# Supplementary material for: Identifying and Targeting Prediction of the PI3K-AKT Signaling Pathway in Drug-Induced Thrombocytopenia in Infected Patients Receiving Linezolid Therapy: A Network Pharmacology-Based Analysis
Source: Hindawi journal article supplement (doi:10.1155/2022/2282351), 2022-10-15
Supplement: f1 [file 2282351.f1.zip]

| ONTOLOGY | ID         | GeneRatio | BgRatio   | pvalue   | p.adjust | qvalue   | Count |
|----------|------------|-----------|-----------|----------|----------|----------|-------|
| BP       | GO:0014065 | 17/80     | 154/18866 | 8.40E-20 | 2.71E-16 | 1.34E-16 | 17    |
| BP       | GO:0048015 | 17/80     | 192/18866 | 3.81E-18 | 5.33E-15 | 2.64E-15 | 17    |
| BP       | GO:0048017 | 17/80     | 196/18866 | 5.43E-18 | 5.33E-15 | 2.64E-15 | 17    |
| BP       | GO:0018209 | 20/80     | 333/18866 | 6.60E-18 | 5.33E-15 | 2.64E-15 | 20    |
| BP       | GO:0018105 | 19/80     | 310/18866 | 3.39E-17 | 2.19E-14 | 1.08E-14 | 19    |
| BP       | GO:0032496 | 19/80     | 334/18866 | 1.35E-16 | 7.27E-14 | 3.60E-14 | 19    |
| BP       | GO:0014066 | 14/80     | 127/18866 | 1.95E-16 | 9.00E-14 | 4.46E-14 | 14    |
| BP       | GO:0071902 | 19/80     | 345/18866 | 2.46E-16 | 9.92E-14 | 4.91E-14 | 19    |
| BP       | GO:0002237 | 19/80     | 356/18866 | 4.38E-16 | 1.57E-13 | 7.78E-14 | 19    |
| BP       | GO:0042110 | 21/80     | 483/18866 | 6.09E-16 | 1.97E-13 | 9.73E-14 | 21    |
| BP       | GO:0043406 | 17/80     | 264/18866 | 8.33E-16 | 2.45E-13 | 1.21E-13 | 17    |
| BP       | GO:0014068 | 12/80     | 88/18866  | 2.27E-15 | 6.11E-13 | 3.02E-13 | 12    |
| BP       | GO:0006979 | 20/80     | 458/18866 | 3.09E-15 | 7.68E-13 | 3.80E-13 | 20    |
| BP       | GO:0043405 | 18/80     | 342/18866 | 3.67E-15 | 8.46E-13 | 4.19E-13 | 18    |
| BP       | GO:0050727 | 19/80     | 425/18866 | 1.11E-14 | 2.38E-12 | 1.18E-12 | 19    |
| BP       | GO:0046777 | 15/80     | 237/18866 | 6.32E-14 | 1.22E-11 | 6.05E-12 | 15    |
| BP       | GO:0072593 | 16/80     | 288/18866 | 6.43E-14 | 1.22E-11 | 6.05E-12 | 16    |
| BP       | GO:0060326 | 16/80     | 311/18866 | 2.11E-13 | 3.78E-11 | 1.87E-11 | 16    |
| BP       | GO:0022407 | 18/80     | 439/18866 | 2.67E-13 | 4.54E-11 | 2.25E-11 | 18    |
| BP       | GO:1903037 | 16/80     | 329/18866 | 5.00E-13 | 8.07E-11 | 4.00E-11 | 16    |
| BP       | GO:0000302 | 14/80     | 235/18866 | 1.07E-12 | 1.64E-10 | 8.14E-11 | 14    |
| BP       | GO:0033002 | 14/80     | 244/18866 | 1.78E-12 | 2.62E-10 | 1.30E-10 | 14    |
| BP       | GO:0062197 | 16/80     | 360/18866 | 1.97E-12 | 2.77E-10 | 1.37E-10 | 16    |
| BP       | GO:0045785 | 17/80     | 428/18866 | 2.23E-12 | 3.00E-10 | 1.49E-10 | 17    |
| BP       | GO:0007159 | 16/80     | 364/18866 | 2.33E-12 | 3.01E-10 | 1.49E-10 | 16    |
| BP       | GO:2000377 | 13/80     | 200/18866 | 2.44E-12 | 3.03E-10 | 1.50E-10 | 13    |
| BP       | GO:0034599 | 15/80     | 310/18866 | 3.11E-12 | 3.72E-10 | 1.84E-10 | 15    |
| BP       | GO:0018108 | 16/80     | 374/18866 | 3.52E-12 | 3.98E-10 | 1.97E-10 | 16    |
| BP       | GO:0070661 | 15/80     | 313/18866 | 3.57E-12 | 3.98E-10 | 1.97E-10 | 15    |
| BP       | GO:0018212 | 16/80     | 377/18866 | 3.97E-12 | 4.27E-10 | 2.11E-10 | 16    |
| BP       | GO:0007568 | 15/80     | 319/18866 | 4.69E-12 | 4.88E-10 | 2.42E-10 | 15    |
| BP       | GO:0032147 | 15/80     | 331/18866 | 7.94E-12 | 8.01E-10 | 3.96E-10 | 15    |
| BP       | GO:0043491 | 14/80     | 278/18866 | 1.04E-11 | 1.02E-09 | 5.03E-10 | 14    |
| BP       | GO:0022409 | 14/80     | 279/18866 | 1.09E-11 | 1.03E-09 | 5.12E-10 | 14    |
| BP       | GO:0030595 | 13/80     | 232/18866 | 1.60E-11 | 1.47E-09 | 7.30E-10 | 13    |
| BP       | GO:1903039 | 13/80     | 235/18866 | 1.88E-11 | 1.68E-09 | 8.34E-10 | 13    |
| BP       | GO:1901214 | 14/80     | 321/18866 | 7.06E-11 | 6.16E-09 | 3.05E-09 | 14    |
| BP       | GO:0042493 | 15/80     | 397/18866 | 1.03E-10 | 8.77E-09 | 4.34E-09 | 15    |
| BP       | GO:0034614 | 11/80     | 170/18866 | 1.41E-10 | 1.16E-08 | 5.76E-09 | 11    |
| BP       | GO:0046651 | 13/80     | 283/18866 | 1.90E-10 | 1.53E-08 | 7.59E-09 | 13    |
| BP       | GO:0010506 | 14/80     | 347/18866 | 1.97E-10 | 1.55E-08 | 7.67E-09 | 14    |
| BP       | GO:0032943 | 13/80     | 286/18866 | 2.16E-10 | 1.66E-08 | 8.24E-09 | 13    |
| BP       | GO:0051897 | 11/80     | 178/18866 | 2.30E-10 | 1.71E-08 | 8.49E-09 | 11    |
| BP       | GO:0050867 | 15/80     | 421/18866 | 2.34E-10 | 1.71E-08 | 8.49E-09 | 15    |
| BP       | GO:0051222 | 14/80     | 354/18866 | 2.56E-10 | 1.83E-08 | 9.08E-09 | 14    |
| BP       | GO:0046686 | 8/80      | 64/18866  | 2.67E-10 | 1.87E-08 | 9.27E-09 | 8     |
| BP       | GO:0070997 | 14/80     | 360/18866 | 3.19E-10 | 2.19E-08 | 1.08E-08 | 14    |
| BP       | GO:0030098 | 14/80     | 368/18866 | 4.25E-10 | 2.85E-08 | 1.41E-08 | 14    |
| BP       | GO:1904951 | 14/80     | 370/18866 | 4.56E-10 | 3.00E-08 | 1.49E-08 | 14    |
| BP       | GO:0071216 | 12/80     | 246/18866 | 5.08E-10 | 3.28E-08 | 1.62E-08 | 12    |
| BP       | GO:0001819 | 15/80     | 447/18866 | 5.35E-10 | 3.39E-08 | 1.68E-08 | 15    |
| BP       | GO:0050673 | 15/80     | 453/18866 | 6.43E-10 | 3.99E-08 | 1.97E-08 | 15    |
| BP       | GO:0030217 | 12/80     | 253/18866 | 7.01E-10 | 4.19E-08 | 2.07E-08 | 12    |
| BP       | GO:0051896 | 12/80     | 253/18866 | 7.01E-10 | 4.19E-08 | 2.07E-08 | 12    |
| BP       | GO:1903426 | 9/80      | 107/18866 | 7.16E-10 | 4.20E-08 | 2.08E-08 | 9     |
| BP       | GO:0031349 | 14/80     | 385/18866 | 7.64E-10 | 4.40E-08 | 2.18E-08 | 14    |
| BP       | GO:0048872 | 12/80     | 256/18866 | 8.01E-10 | 4.54E-08 | 2.25E-08 | 12    |

|    |            |       |           |          |          |          |    |
|----|------------|-------|-----------|----------|----------|----------|----|
| BP | GO:0031100 | 8/80  | 75/18866  | 9.80E-10 | 5.45E-08 | 2.70E-08 | 8  |
| BP | GO:0071222 | 11/80 | 208/18866 | 1.21E-09 | 6.62E-08 | 3.28E-08 | 11 |
| BP | GO:0050729 | 10/80 | 158/18866 | 1.27E-09 | 6.83E-08 | 3.38E-08 | 10 |
| BP | GO:0050863 | 13/80 | 332/18866 | 1.34E-09 | 7.10E-08 | 3.51E-08 | 13 |
| BP | GO:0002696 | 14/80 | 406/18866 | 1.52E-09 | 7.90E-08 | 3.91E-08 | 14 |
| BP | GO:0018107 | 9/80  | 117/18866 | 1.59E-09 | 8.17E-08 | 4.04E-08 | 9  |
| BP | GO:0007596 | 13/80 | 343/18866 | 1.99E-09 | 1.00E-07 | 4.97E-08 | 13 |
| BP | GO:0036092 | 5/80  | 14/18866  | 2.35E-09 | 1.16E-07 | 5.73E-08 | 5  |
| BP | GO:0007599 | 13/80 | 348/18866 | 2.37E-09 | 1.16E-07 | 5.73E-08 | 13 |
| BP | GO:0071219 | 11/80 | 222/18866 | 2.40E-09 | 1.16E-07 | 5.73E-08 | 11 |
| BP | GO:0050817 | 13/80 | 349/18866 | 2.45E-09 | 1.16E-07 | 5.75E-08 | 13 |
| BP | GO:0032731 | 7/80  | 53/18866  | 2.48E-09 | 1.16E-07 | 5.75E-08 | 7  |
| BP | GO:0018210 | 9/80  | 126/18866 | 3.08E-09 | 1.42E-07 | 7.03E-08 | 9  |
| BP | GO:1903409 | 9/80  | 128/18866 | 3.54E-09 | 1.61E-07 | 7.97E-08 | 9  |
| BP | GO:0051052 | 13/80 | 365/18866 | 4.21E-09 | 1.89E-07 | 9.34E-08 | 13 |
| BP | GO:0046427 | 8/80  | 90/18866  | 4.28E-09 | 1.89E-07 | 9.36E-08 | 8  |
| BP | GO:0010038 | 13/80 | 366/18866 | 4.35E-09 | 1.90E-07 | 9.39E-08 | 13 |
| BP | GO:0045862 | 13/80 | 370/18866 | 4.96E-09 | 2.13E-07 | 1.06E-07 | 13 |
| BP | GO:0051770 | 5/80  | 16/18866  | 5.09E-09 | 2.16E-07 | 1.07E-07 | 5  |
| BP | GO:0009314 | 14/80 | 447/18866 | 5.20E-09 | 2.18E-07 | 1.08E-07 | 14 |
| BP | GO:1904894 | 8/80  | 93/18866  | 5.56E-09 | 2.30E-07 | 1.14E-07 | 8  |
| BP | GO:0032732 | 7/80  | 60/18866  | 6.08E-09 | 2.48E-07 | 1.23E-07 | 7  |
| BP | GO:0017038 | 10/80 | 200/18866 | 1.24E-08 | 4.99E-07 | 2.47E-07 | 10 |
| BP | GO:0006606 | 9/80  | 150/18866 | 1.43E-08 | 5.70E-07 | 2.82E-07 | 9  |
| BP | GO:0046632 | 8/80  | 106/18866 | 1.58E-08 | 6.13E-07 | 3.03E-07 | 8  |
| BP | GO:2000379 | 8/80  | 106/18866 | 1.58E-08 | 6.13E-07 | 3.03E-07 | 8  |
| BP | GO:0016572 | 6/80  | 40/18866  | 1.64E-08 | 6.32E-07 | 3.13E-07 | 6  |
| BP | GO:0051767 | 5/80  | 20/18866  | 1.78E-08 | 6.68E-07 | 3.31E-07 | 5  |
| BP | GO:0051769 | 5/80  | 20/18866  | 1.78E-08 | 6.68E-07 | 3.31E-07 | 5  |
| BP | GO:0002262 | 9/80  | 154/18866 | 1.80E-08 | 6.68E-07 | 3.31E-07 | 9  |
| BP | GO:0071887 | 8/80  | 108/18866 | 1.83E-08 | 6.70E-07 | 3.32E-07 | 8  |
| BP | GO:0030258 | 11/80 | 271/18866 | 1.91E-08 | 6.94E-07 | 3.44E-07 | 11 |
| BP | GO:0014823 | 7/80  | 71/18866  | 2.02E-08 | 7.15E-07 | 3.54E-07 | 7  |
| BP | GO:0042531 | 7/80  | 71/18866  | 2.02E-08 | 7.15E-07 | 3.54E-07 | 7  |
| BP | GO:1901215 | 10/80 | 212/18866 | 2.15E-08 | 7.56E-07 | 3.74E-07 | 10 |
| BP | GO:0032652 | 8/80  | 111/18866 | 2.27E-08 | 7.87E-07 | 3.90E-07 | 8  |
| BP | GO:0050870 | 10/80 | 214/18866 | 2.36E-08 | 8.09E-07 | 4.00E-07 | 10 |
| BP | GO:0015980 | 11/80 | 278/18866 | 2.49E-08 | 8.45E-07 | 4.18E-07 | 11 |
| BP | GO:0055093 | 5/80  | 22/18866  | 3.01E-08 | 1.01E-06 | 5.00E-07 | 5  |
| BP | GO:0007259 | 9/80  | 164/18866 | 3.11E-08 | 1.04E-06 | 5.12E-07 | 9  |
| BP | GO:0051251 | 12/80 | 357/18866 | 3.33E-08 | 1.09E-06 | 5.38E-07 | 12 |
| BP | GO:0097529 | 10/80 | 222/18866 | 3.34E-08 | 1.09E-06 | 5.38E-07 | 10 |
| BP | GO:0051100 | 9/80  | 169/18866 | 4.03E-08 | 1.30E-06 | 6.45E-07 | 9  |
| BP | GO:0048732 | 13/80 | 443/18866 | 4.18E-08 | 1.34E-06 | 6.61E-07 | 13 |
| BP | GO:0051170 | 9/80  | 171/18866 | 4.47E-08 | 1.40E-06 | 6.93E-07 | 9  |
| BP | GO:0032612 | 8/80  | 121/18866 | 4.47E-08 | 1.40E-06 | 6.93E-07 | 8  |
| BP | GO:1900182 | 7/80  | 80/18866  | 4.67E-08 | 1.44E-06 | 7.15E-07 | 7  |
| BP | GO:0050714 | 9/80  | 172/18866 | 4.70E-08 | 1.44E-06 | 7.15E-07 | 9  |
| BP | GO:0048660 | 9/80  | 173/18866 | 4.94E-08 | 1.50E-06 | 7.44E-07 | 9  |
| BP | GO:0097696 | 9/80  | 174/18866 | 5.19E-08 | 1.57E-06 | 7.75E-07 | 9  |
| BP | GO:0048659 | 9/80  | 175/18866 | 5.45E-08 | 1.63E-06 | 8.07E-07 | 9  |
| BP | GO:0009306 | 13/80 | 462/18866 | 6.82E-08 | 2.02E-06 | 1.00E-06 | 13 |
| BP | GO:0035592 | 13/80 | 463/18866 | 6.99E-08 | 2.05E-06 | 1.02E-06 | 13 |
| BP | GO:0010507 | 7/80  | 85/18866  | 7.14E-08 | 2.08E-06 | 1.03E-06 | 7  |
| BP | GO:0042509 | 7/80  | 86/18866  | 7.74E-08 | 2.23E-06 | 1.10E-06 | 7  |
| BP | GO:0071692 | 13/80 | 470/18866 | 8.32E-08 | 2.38E-06 | 1.18E-06 | 13 |
| BP | GO:0001936 | 9/80  | 184/18866 | 8.39E-08 | 2.38E-06 | 1.18E-06 | 9  |
| BP | GO:0031331 | 12/80 | 390/18866 | 8.74E-08 | 2.45E-06 | 1.21E-06 | 12 |

|    |            |       |           |          |          |          |    |
|----|------------|-------|-----------|----------|----------|----------|----|
| BP | GO:0045333 | 9/80  | 187/18866 | 9.64E-08 | 2.68E-06 | 1.33E-06 | 9  |
| BP | GO:0007260 | 7/80  | 89/18866  | 9.83E-08 | 2.71E-06 | 1.34E-06 | 7  |
| BP | GO:0050678 | 12/80 | 395/18866 | 1.00E-07 | 2.74E-06 | 1.35E-06 | 12 |
| BP | GO:0009416 | 11/80 | 319/18866 | 1.01E-07 | 2.74E-06 | 1.35E-06 | 11 |
| BP | GO:0009895 | 11/80 | 323/18866 | 1.14E-07 | 3.08E-06 | 1.52E-06 | 11 |
| BP | GO:0032655 | 6/80  | 55/18866  | 1.18E-07 | 3.15E-06 | 1.56E-06 | 6  |
| BP | GO:0071496 | 11/80 | 326/18866 | 1.26E-07 | 3.31E-06 | 1.64E-06 | 11 |
| BP | GO:0002793 | 9/80  | 193/18866 | 1.26E-07 | 3.31E-06 | 1.64E-06 | 9  |
| BP | GO:0036296 | 5/80  | 29/18866  | 1.32E-07 | 3.42E-06 | 1.69E-06 | 5  |
| BP | GO:2000108 | 5/80  | 29/18866  | 1.32E-07 | 3.42E-06 | 1.69E-06 | 5  |
| BP | GO:0042098 | 9/80  | 195/18866 | 1.38E-07 | 3.50E-06 | 1.73E-06 | 9  |
| BP | GO:0050731 | 9/80  | 195/18866 | 1.38E-07 | 3.50E-06 | 1.73E-06 | 9  |
| BP | GO:0009411 | 8/80  | 140/18866 | 1.39E-07 | 3.51E-06 | 1.74E-06 | 8  |
| BP | GO:0032615 | 6/80  | 57/18866  | 1.47E-07 | 3.67E-06 | 1.82E-06 | 6  |
| BP | GO:0008202 | 11/80 | 332/18866 | 1.51E-07 | 3.75E-06 | 1.85E-06 | 11 |
| BP | GO:0046425 | 8/80  | 142/18866 | 1.55E-07 | 3.82E-06 | 1.89E-06 | 8  |
| BP | GO:0050730 | 10/80 | 263/18866 | 1.63E-07 | 3.98E-06 | 1.97E-06 | 10 |
| BP | GO:0001935 | 9/80  | 199/18866 | 1.64E-07 | 3.98E-06 | 1.97E-06 | 9  |
| BP | GO:0051054 | 9/80  | 200/18866 | 1.71E-07 | 4.12E-06 | 2.04E-06 | 9  |
| BP | GO:0031330 | 10/80 | 265/18866 | 1.75E-07 | 4.19E-06 | 2.07E-06 | 10 |
| BP | GO:0032651 | 7/80  | 97/18866  | 1.78E-07 | 4.20E-06 | 2.08E-06 | 7  |
| BP | GO:0031099 | 9/80  | 201/18866 | 1.78E-07 | 4.20E-06 | 2.08E-06 | 9  |
| BP | GO:0042542 | 8/80  | 146/18866 | 1.92E-07 | 4.46E-06 | 2.21E-06 | 8  |
| BP | GO:0046631 | 8/80  | 146/18866 | 1.92E-07 | 4.46E-06 | 2.21E-06 | 8  |
| BP | GO:0042116 | 7/80  | 101/18866 | 2.36E-07 | 5.43E-06 | 2.69E-06 | 7  |
| BP | GO:0045927 | 10/80 | 274/18866 | 2.39E-07 | 5.46E-06 | 2.70E-06 | 10 |
| BP | GO:0002294 | 6/80  | 62/18866  | 2.44E-07 | 5.56E-06 | 2.75E-06 | 6  |
| BP | GO:0009612 | 9/80  | 209/18866 | 2.48E-07 | 5.58E-06 | 2.76E-06 | 9  |
| BP | GO:1904892 | 8/80  | 151/18866 | 2.49E-07 | 5.58E-06 | 2.76E-06 | 8  |
| BP | GO:0034504 | 10/80 | 277/18866 | 2.64E-07 | 5.83E-06 | 2.89E-06 | 10 |
| BP | GO:0002287 | 6/80  | 63/18866  | 2.69E-07 | 5.83E-06 | 2.89E-06 | 6  |
| BP | GO:0002293 | 6/80  | 63/18866  | 2.69E-07 | 5.83E-06 | 2.89E-06 | 6  |
| BP | GO:0046622 | 6/80  | 63/18866  | 2.69E-07 | 5.83E-06 | 2.89E-06 | 6  |
| BP | GO:0048661 | 7/80  | 103/18866 | 2.70E-07 | 5.83E-06 | 2.89E-06 | 7  |
| BP | GO:0050708 | 11/80 | 352/18866 | 2.71E-07 | 5.83E-06 | 2.89E-06 | 11 |
| BP | GO:0000187 | 8/80  | 156/18866 | 3.20E-07 | 6.83E-06 | 3.38E-06 | 8  |
| BP | GO:0032091 | 7/80  | 106/18866 | 3.28E-07 | 6.93E-06 | 3.43E-06 | 7  |
| BP | GO:0032611 | 7/80  | 106/18866 | 3.28E-07 | 6.93E-06 | 3.43E-06 | 7  |
| BP | GO:0032735 | 5/80  | 35/18866  | 3.55E-07 | 7.44E-06 | 3.68E-06 | 5  |
| BP | GO:0032675 | 8/80  | 159/18866 | 3.70E-07 | 7.70E-06 | 3.81E-06 | 8  |
| BP | GO:0043434 | 12/80 | 447/18866 | 3.79E-07 | 7.84E-06 | 3.88E-06 | 12 |
| BP | GO:0033138 | 7/80  | 109/18866 | 3.97E-07 | 8.17E-06 | 4.04E-06 | 7  |
| BP | GO:0051098 | 11/80 | 367/18866 | 4.10E-07 | 8.38E-06 | 4.15E-06 | 11 |
| BP | GO:0009896 | 12/80 | 454/18866 | 4.47E-07 | 9.02E-06 | 4.46E-06 | 12 |
| BP | GO:0050804 | 12/80 | 454/18866 | 4.47E-07 | 9.02E-06 | 4.46E-06 | 12 |
| BP | GO:0002526 | 7/80  | 111/18866 | 4.50E-07 | 9.02E-06 | 4.46E-06 | 7  |
| BP | GO:0051090 | 12/80 | 455/18866 | 4.57E-07 | 9.06E-06 | 4.48E-06 | 12 |
| BP | GO:0099177 | 12/80 | 455/18866 | 4.57E-07 | 9.06E-06 | 4.48E-06 | 12 |
| BP | GO:0031960 | 8/80  | 164/18866 | 4.68E-07 | 9.22E-06 | 4.56E-06 | 8  |
| BP | GO:0034250 | 8/80  | 167/18866 | 5.38E-07 | 1.05E-05 | 5.21E-06 | 8  |
| BP | GO:0002292 | 6/80  | 71/18866  | 5.53E-07 | 1.07E-05 | 5.32E-06 | 6  |
| BP | GO:0010001 | 9/80  | 230/18866 | 5.57E-07 | 1.08E-05 | 5.33E-06 | 9  |
| BP | GO:0002791 | 11/80 | 381/18866 | 5.94E-07 | 1.14E-05 | 5.65E-06 | 11 |
| BP | GO:0032635 | 8/80  | 170/18866 | 6.15E-07 | 1.18E-05 | 5.82E-06 | 8  |
| BP | GO:1904019 | 7/80  | 117/18866 | 6.44E-07 | 1.22E-05 | 6.05E-06 | 7  |
| BP | GO:0042063 | 10/80 | 307/18866 | 6.77E-07 | 1.28E-05 | 6.33E-06 | 10 |
| BP | GO:0042307 | 5/80  | 40/18866  | 7.08E-07 | 1.33E-05 | 6.57E-06 | 5  |
| BP | GO:0046034 | 10/80 | 311/18866 | 7.62E-07 | 1.42E-05 | 7.03E-06 | 10 |

|    |            |       |           |          |          |          |    |
|----|------------|-------|-----------|----------|----------|----------|----|
| BP | GO:0070663 | 9/80  | 240/18866 | 7.94E-07 | 1.47E-05 | 7.29E-06 | 9  |
| BP | GO:0016241 | 8/80  | 176/18866 | 8.00E-07 | 1.48E-05 | 7.31E-06 | 8  |
| BP | GO:1903532 | 10/80 | 313/18866 | 8.07E-07 | 1.48E-05 | 7.33E-06 | 10 |
| BP | GO:0070482 | 11/80 | 396/18866 | 8.68E-07 | 1.58E-05 | 7.83E-06 | 11 |
| BP | GO:1904591 | 5/80  | 42/18866  | 9.09E-07 | 1.65E-05 | 8.16E-06 | 5  |
| BP | GO:0043367 | 6/80  | 78/18866  | 9.68E-07 | 1.75E-05 | 8.64E-06 | 6  |
| BP | GO:0034612 | 10/80 | 320/18866 | 9.87E-07 | 1.77E-05 | 8.76E-06 | 10 |
| BP | GO:0045124 | 5/80  | 43/18866  | 1.02E-06 | 1.83E-05 | 9.05E-06 | 5  |
| BP | GO:0071621 | 7/80  | 127/18866 | 1.12E-06 | 1.98E-05 | 9.79E-06 | 7  |
| BP | GO:1900180 | 7/80  | 127/18866 | 1.12E-06 | 1.98E-05 | 9.79E-06 | 7  |
| BP | GO:2000045 | 8/80  | 185/18866 | 1.17E-06 | 2.05E-05 | 1.01E-05 | 8  |
| BP | GO:0042113 | 10/80 | 328/18866 | 1.23E-06 | 2.15E-05 | 1.07E-05 | 10 |
| BP | GO:0002285 | 8/80  | 187/18866 | 1.26E-06 | 2.19E-05 | 1.09E-05 | 8  |
| BP | GO:0071214 | 10/80 | 331/18866 | 1.34E-06 | 2.30E-05 | 1.14E-05 | 10 |
| BP | GO:0104004 | 10/80 | 331/18866 | 1.34E-06 | 2.30E-05 | 1.14E-05 | 10 |
| BP | GO:0010508 | 7/80  | 131/18866 | 1.38E-06 | 2.36E-05 | 1.17E-05 | 7  |
| BP | GO:0014855 | 6/80  | 83/18866  | 1.40E-06 | 2.38E-05 | 1.18E-05 | 6  |
| BP | GO:0010863 | 5/80  | 46/18866  | 1.44E-06 | 2.44E-05 | 1.21E-05 | 5  |
| BP | GO:1903829 | 10/80 | 338/18866 | 1.62E-06 | 2.72E-05 | 1.35E-05 | 10 |
| BP | GO:0051047 | 10/80 | 340/18866 | 1.70E-06 | 2.85E-05 | 1.41E-05 | 10 |
| BP | GO:0001776 | 6/80  | 86/18866  | 1.72E-06 | 2.86E-05 | 1.41E-05 | 6  |
| BP | GO:2000106 | 6/80  | 86/18866  | 1.72E-06 | 2.86E-05 | 1.41E-05 | 6  |
| BP | GO:0045930 | 10/80 | 341/18866 | 1.75E-06 | 2.88E-05 | 1.43E-05 | 10 |
| BP | GO:0045727 | 7/80  | 136/18866 | 1.78E-06 | 2.91E-05 | 1.44E-05 | 7  |
| BP | GO:0055023 | 5/80  | 48/18866  | 1.79E-06 | 2.91E-05 | 1.44E-05 | 5  |
| BP | GO:1900274 | 5/80  | 48/18866  | 1.79E-06 | 2.91E-05 | 1.44E-05 | 5  |
| BP | GO:0032755 | 6/80  | 88/18866  | 1.97E-06 | 3.19E-05 | 1.58E-05 | 6  |
| BP | GO:0045058 | 5/80  | 49/18866  | 1.99E-06 | 3.19E-05 | 1.58E-05 | 5  |
| BP | GO:0048545 | 10/80 | 346/18866 | 1.99E-06 | 3.19E-05 | 1.58E-05 | 10 |
| BP | GO:0051900 | 4/80  | 22/18866  | 2.07E-06 | 3.29E-05 | 1.63E-05 | 4  |
| BP | GO:0046850 | 5/80  | 50/18866  | 2.20E-06 | 3.47E-05 | 1.72E-05 | 5  |
| BP | GO:1903580 | 5/80  | 50/18866  | 2.20E-06 | 3.47E-05 | 1.72E-05 | 5  |
| BP | GO:0006260 | 9/80  | 273/18866 | 2.31E-06 | 3.61E-05 | 1.79E-05 | 9  |
| BP | GO:0048638 | 10/80 | 353/18866 | 2.39E-06 | 3.72E-05 | 1.84E-05 | 10 |
| BP | GO:0000002 | 4/80  | 23/18866  | 2.50E-06 | 3.86E-05 | 1.91E-05 | 4  |
| BP | GO:1904996 | 4/80  | 23/18866  | 2.50E-06 | 3.86E-05 | 1.91E-05 | 4  |
| BP | GO:1900407 | 6/80  | 92/18866  | 2.56E-06 | 3.94E-05 | 1.95E-05 | 6  |
| BP | GO:1902806 | 8/80  | 206/18866 | 2.61E-06 | 3.99E-05 | 1.97E-05 | 8  |
| BP | GO:0000186 | 5/80  | 52/18866  | 2.69E-06 | 4.07E-05 | 2.01E-05 | 5  |
| BP | GO:0060421 | 5/80  | 52/18866  | 2.69E-06 | 4.07E-05 | 2.01E-05 | 5  |
| BP | GO:0033135 | 7/80  | 145/18866 | 2.72E-06 | 4.10E-05 | 2.03E-05 | 7  |
| BP | GO:0002532 | 6/80  | 93/18866  | 2.73E-06 | 4.10E-05 | 2.03E-05 | 6  |
| BP | GO:0051384 | 7/80  | 147/18866 | 2.98E-06 | 4.42E-05 | 2.19E-05 | 7  |
| BP | GO:0042738 | 4/80  | 24/18866  | 2.99E-06 | 4.42E-05 | 2.19E-05 | 4  |
| BP | GO:0051882 | 4/80  | 24/18866  | 2.99E-06 | 4.42E-05 | 2.19E-05 | 4  |
| BP | GO:0032868 | 9/80  | 283/18866 | 3.10E-06 | 4.56E-05 | 2.26E-05 | 9  |
| BP | GO:0050679 | 8/80  | 211/18866 | 3.12E-06 | 4.57E-05 | 2.26E-05 | 8  |
| BP | GO:0097530 | 7/80  | 150/18866 | 3.41E-06 | 4.98E-05 | 2.47E-05 | 7  |
| BP | GO:0035710 | 6/80  | 97/18866  | 3.49E-06 | 5.03E-05 | 2.49E-05 | 6  |
| BP | GO:0036473 | 6/80  | 97/18866  | 3.49E-06 | 5.03E-05 | 2.49E-05 | 6  |
| BP | GO:0042775 | 6/80  | 97/18866  | 3.49E-06 | 5.03E-05 | 2.49E-05 | 6  |
| BP | GO:0042773 | 6/80  | 98/18866  | 3.71E-06 | 5.32E-05 | 2.63E-05 | 6  |
| BP | GO:0050670 | 8/80  | 219/18866 | 4.10E-06 | 5.86E-05 | 2.90E-05 | 8  |
| BP | GO:0042737 | 4/80  | 26/18866  | 4.17E-06 | 5.94E-05 | 2.94E-05 | 4  |
| BP | GO:0046854 | 5/80  | 57/18866  | 4.26E-06 | 6.03E-05 | 2.98E-05 | 5  |
| BP | GO:0032944 | 8/80  | 221/18866 | 4.39E-06 | 6.16E-05 | 3.05E-05 | 8  |
| BP | GO:0071241 | 8/80  | 221/18866 | 4.39E-06 | 6.16E-05 | 3.05E-05 | 8  |
| BP | GO:1902882 | 6/80  | 101/18866 | 4.42E-06 | 6.18E-05 | 3.06E-05 | 6  |

|    |            |       |           |          |          |          |    |
|----|------------|-------|-----------|----------|----------|----------|----|
| BP | GO:0060249 | 11/80 | 469/18866 | 4.45E-06 | 6.20E-05 | 3.07E-05 | 11 |
| BP | GO:0019722 | 8/80  | 222/18866 | 4.54E-06 | 6.29E-05 | 3.11E-05 | 8  |
| BP | GO:0071356 | 9/80  | 297/18866 | 4.59E-06 | 6.33E-05 | 3.13E-05 | 9  |
| BP | GO:0030168 | 7/80  | 158/18866 | 4.81E-06 | 6.60E-05 | 3.27E-05 | 7  |
| BP | GO:0031667 | 11/80 | 473/18866 | 4.83E-06 | 6.60E-05 | 3.27E-05 | 11 |
| BP | GO:0072539 | 4/80  | 27/18866  | 4.88E-06 | 6.65E-05 | 3.29E-05 | 4  |
| BP | GO:0042306 | 5/80  | 59/18866  | 5.06E-06 | 6.86E-05 | 3.39E-05 | 5  |
| BP | GO:0032653 | 5/80  | 60/18866  | 5.50E-06 | 7.33E-05 | 3.63E-05 | 5  |
| BP | GO:0042093 | 5/80  | 60/18866  | 5.50E-06 | 7.33E-05 | 3.63E-05 | 5  |
| BP | GO:0061900 | 5/80  | 60/18866  | 5.50E-06 | 7.33E-05 | 3.63E-05 | 5  |
| BP | GO:1903428 | 5/80  | 60/18866  | 5.50E-06 | 7.33E-05 | 3.63E-05 | 5  |
| BP | GO:0043467 | 7/80  | 162/18866 | 5.68E-06 | 7.48E-05 | 3.70E-05 | 7  |
| BP | GO:0002360 | 4/80  | 28/18866  | 5.68E-06 | 7.48E-05 | 3.70E-05 | 4  |
| BP | GO:0032800 | 4/80  | 28/18866  | 5.68E-06 | 7.48E-05 | 3.70E-05 | 4  |
| BP | GO:0050920 | 8/80  | 229/18866 | 5.70E-06 | 7.48E-05 | 3.70E-05 | 8  |
| BP | GO:0019233 | 6/80  | 106/18866 | 5.85E-06 | 7.65E-05 | 3.79E-05 | 6  |
| BP | GO:0045576 | 5/80  | 61/18866  | 5.97E-06 | 7.77E-05 | 3.84E-05 | 5  |
| BP | GO:0010518 | 5/80  | 62/18866  | 6.47E-06 | 8.32E-05 | 4.12E-05 | 5  |
| BP | GO:0055025 | 5/80  | 62/18866  | 6.47E-06 | 8.32E-05 | 4.12E-05 | 5  |
| BP | GO:1904589 | 5/80  | 62/18866  | 6.47E-06 | 8.32E-05 | 4.12E-05 | 5  |
| BP | GO:0045787 | 10/80 | 396/18866 | 6.60E-06 | 8.45E-05 | 4.18E-05 | 10 |
| BP | GO:0097305 | 8/80  | 234/18866 | 6.68E-06 | 8.52E-05 | 4.22E-05 | 8  |
| BP | GO:0002286 | 6/80  | 109/18866 | 6.88E-06 | 8.74E-05 | 4.33E-05 | 6  |
| BP | GO:0042129 | 7/80  | 167/18866 | 6.93E-06 | 8.77E-05 | 4.34E-05 | 7  |
| BP | GO:0032613 | 5/80  | 63/18866  | 7.00E-06 | 8.83E-05 | 4.37E-05 | 5  |
| BP | GO:0046879 | 9/80  | 314/18866 | 7.19E-06 | 9.02E-05 | 4.46E-05 | 9  |
| BP | GO:0045931 | 7/80  | 168/18866 | 7.21E-06 | 9.02E-05 | 4.46E-05 | 7  |
| BP | GO:0009141 | 6/80  | 110/18866 | 7.25E-06 | 9.03E-05 | 4.47E-05 | 6  |
| BP | GO:0045453 | 5/80  | 64/18866  | 7.57E-06 | 9.40E-05 | 4.65E-05 | 5  |
| BP | GO:0001938 | 6/80  | 113/18866 | 8.47E-06 | 0.000105 | 5.18E-05 | 6  |
| BP | GO:0045348 | 3/80  | 10/18866  | 8.62E-06 | 0.000106 | 5.23E-05 | 3  |
| BP | GO:0051901 | 3/80  | 10/18866  | 8.62E-06 | 0.000106 | 5.23E-05 | 3  |
| BP | GO:0072538 | 4/80  | 31/18866  | 8.64E-06 | 0.000106 | 5.23E-05 | 4  |
| BP | GO:0046824 | 5/80  | 66/18866  | 8.82E-06 | 0.000107 | 5.32E-05 | 5  |
| BP | GO:0009914 | 9/80  | 323/18866 | 9.02E-06 | 0.000109 | 5.42E-05 | 9  |
| BP | GO:0042593 | 8/80  | 245/18866 | 9.34E-06 | 0.000113 | 5.59E-05 | 8  |
| BP | GO:0045123 | 5/80  | 67/18866  | 9.50E-06 | 0.000114 | 5.66E-05 | 5  |
| BP | GO:0033500 | 8/80  | 246/18866 | 9.63E-06 | 0.000116 | 5.72E-05 | 8  |
| BP | GO:0010634 | 7/80  | 176/18866 | 9.77E-06 | 0.000116 | 5.76E-05 | 7  |
| BP | GO:0022904 | 6/80  | 116/18866 | 9.84E-06 | 0.000116 | 5.76E-05 | 6  |
| BP | GO:0046620 | 6/80  | 116/18866 | 9.84E-06 | 0.000116 | 5.76E-05 | 6  |
| BP | GO:0097421 | 4/80  | 32/18866  | 9.85E-06 | 0.000116 | 5.76E-05 | 4  |
| BP | GO:0045428 | 5/80  | 68/18866  | 1.02E-05 | 0.00012  | 5.96E-05 | 5  |
| BP | GO:0033028 | 4/80  | 33/18866  | 1.12E-05 | 0.000131 | 6.49E-05 | 4  |
| BP | GO:1901796 | 7/80  | 180/18866 | 1.13E-05 | 0.000132 | 6.55E-05 | 7  |
| BP | GO:0002534 | 5/80  | 70/18866  | 1.18E-05 | 0.000137 | 6.79E-05 | 5  |
| BP | GO:0035747 | 3/80  | 11/18866  | 1.18E-05 | 0.000137 | 6.79E-05 | 3  |
| BP | GO:0090316 | 7/80  | 182/18866 | 1.22E-05 | 0.000141 | 6.96E-05 | 7  |
| BP | GO:0030218 | 6/80  | 121/18866 | 1.25E-05 | 0.000144 | 7.12E-05 | 6  |
| BP | GO:0016242 | 4/80  | 34/18866  | 1.26E-05 | 0.000144 | 7.12E-05 | 4  |
| BP | GO:0042759 | 4/80  | 34/18866  | 1.26E-05 | 0.000144 | 7.12E-05 | 4  |
| BP | GO:0050715 | 4/80  | 34/18866  | 1.26E-05 | 0.000144 | 7.12E-05 | 4  |
| BP | GO:0022900 | 7/80  | 184/18866 | 1.31E-05 | 0.000148 | 7.34E-05 | 7  |
| BP | GO:0030072 | 8/80  | 257/18866 | 1.32E-05 | 0.00015  | 7.41E-05 | 8  |
| BP | GO:0046834 | 5/80  | 72/18866  | 1.35E-05 | 0.000152 | 7.53E-05 | 5  |
| BP | GO:0050663 | 5/80  | 72/18866  | 1.35E-05 | 0.000152 | 7.53E-05 | 5  |
| BP | GO:0019216 | 10/80 | 431/18866 | 1.38E-05 | 0.000154 | 7.62E-05 | 10 |
| BP | GO:0030099 | 10/80 | 431/18866 | 1.38E-05 | 0.000154 | 7.62E-05 | 10 |

|    |            |      |           |          |          |          |   |
|----|------------|------|-----------|----------|----------|----------|---|
| BP | GO:0010517 | 5/80 | 73/18866  | 1.45E-05 | 0.000159 | 7.88E-05 | 5 |
| BP | GO:0070227 | 5/80 | 73/18866  | 1.45E-05 | 0.000159 | 7.88E-05 | 5 |
| BP | GO:0072401 | 5/80 | 73/18866  | 1.45E-05 | 0.000159 | 7.88E-05 | 5 |
| BP | GO:0072422 | 5/80 | 73/18866  | 1.45E-05 | 0.000159 | 7.88E-05 | 5 |
| BP | GO:0048639 | 7/80 | 187/18866 | 1.45E-05 | 0.000159 | 7.88E-05 | 7 |
| BP | GO:1903578 | 6/80 | 125/18866 | 1.51E-05 | 0.000165 | 8.18E-05 | 6 |
| BP | GO:0051881 | 5/80 | 74/18866  | 1.55E-05 | 0.000168 | 8.33E-05 | 5 |
| BP | GO:0072395 | 5/80 | 74/18866  | 1.55E-05 | 0.000168 | 8.33E-05 | 5 |
| BP | GO:1904181 | 3/80 | 12/18866  | 1.57E-05 | 0.00017  | 8.43E-05 | 3 |
| BP | GO:2000134 | 6/80 | 126/18866 | 1.58E-05 | 0.000171 | 8.44E-05 | 6 |
| BP | GO:0043368 | 4/80 | 36/18866  | 1.59E-05 | 0.000171 | 8.48E-05 | 4 |
| BP | GO:0033157 | 8/80 | 264/18866 | 1.61E-05 | 0.000172 | 8.52E-05 | 8 |
| BP | GO:0035924 | 5/80 | 75/18866  | 1.65E-05 | 0.000177 | 8.75E-05 | 5 |
| BP | GO:0046883 | 8/80 | 267/18866 | 1.74E-05 | 0.000185 | 9.16E-05 | 8 |
| BP | GO:0072331 | 8/80 | 267/18866 | 1.74E-05 | 0.000185 | 9.16E-05 | 8 |
| BP | GO:0060193 | 5/80 | 76/18866  | 1.76E-05 | 0.000187 | 9.24E-05 | 5 |
| BP | GO:1904994 | 4/80 | 37/18866  | 1.78E-05 | 0.000188 | 9.29E-05 | 4 |
| BP | GO:0034101 | 6/80 | 129/18866 | 1.81E-05 | 0.00019  | 9.40E-05 | 6 |
| BP | GO:0006913 | 9/80 | 354/18866 | 1.87E-05 | 0.000195 | 9.67E-05 | 9 |
| BP | GO:0150076 | 5/80 | 77/18866  | 1.88E-05 | 0.000195 | 9.67E-05 | 5 |
| BP | GO:1903201 | 5/80 | 77/18866  | 1.88E-05 | 0.000195 | 9.67E-05 | 5 |
| BP | GO:0051091 | 8/80 | 270/18866 | 1.89E-05 | 0.000195 | 9.67E-05 | 8 |
| BP | GO:1901988 | 8/80 | 270/18866 | 1.89E-05 | 0.000195 | 9.67E-05 | 8 |
| BP | GO:0032733 | 4/80 | 38/18866  | 1.98E-05 | 0.000203 | 0.000101 | 4 |
| BP | GO:0060045 | 4/80 | 38/18866  | 1.98E-05 | 0.000203 | 0.000101 | 4 |
| BP | GO:0071276 | 4/80 | 38/18866  | 1.98E-05 | 0.000203 | 0.000101 | 4 |
| BP | GO:0051169 | 9/80 | 357/18866 | 2.00E-05 | 0.000204 | 0.000101 | 9 |
| BP | GO:0006264 | 3/80 | 13/18866  | 2.04E-05 | 0.000207 | 0.000103 | 3 |
| BP | GO:1902807 | 6/80 | 132/18866 | 2.06E-05 | 0.000209 | 0.000103 | 6 |
| BP | GO:0001666 | 9/80 | 359/18866 | 2.09E-05 | 0.000211 | 0.000104 | 9 |
| BP | GO:0010948 | 9/80 | 359/18866 | 2.09E-05 | 0.000211 | 0.000104 | 9 |
| BP | GO:0006809 | 5/80 | 79/18866  | 2.13E-05 | 0.000214 | 0.000106 | 5 |
| BP | GO:0071260 | 5/80 | 79/18866  | 2.13E-05 | 0.000214 | 0.000106 | 5 |
| BP | GO:0042770 | 6/80 | 133/18866 | 2.15E-05 | 0.000215 | 0.000106 | 6 |
| BP | GO:0042092 | 4/80 | 39/18866  | 2.20E-05 | 0.000219 | 0.000109 | 4 |
| BP | GO:1901654 | 7/80 | 200/18866 | 2.24E-05 | 0.000222 | 0.00011  | 7 |
| BP | GO:0055021 | 5/80 | 80/18866  | 2.26E-05 | 0.000224 | 0.000111 | 5 |
| BP | GO:0010952 | 7/80 | 201/18866 | 2.31E-05 | 0.000228 | 0.000113 | 7 |
| BP | GO:0010631 | 9/80 | 365/18866 | 2.38E-05 | 0.000234 | 0.000116 | 9 |
| BP | GO:0045740 | 4/80 | 40/18866  | 2.44E-05 | 0.000239 | 0.000118 | 4 |
| BP | GO:0090132 | 9/80 | 368/18866 | 2.54E-05 | 0.000247 | 0.000122 | 9 |
| BP | GO:0030183 | 6/80 | 137/18866 | 2.54E-05 | 0.000247 | 0.000122 | 6 |
| BP | GO:1903708 | 7/80 | 204/18866 | 2.54E-05 | 0.000247 | 0.000122 | 7 |
| BP | GO:0051709 | 3/80 | 14/18866  | 2.58E-05 | 0.00025  | 0.000124 | 3 |
| BP | GO:0038083 | 4/80 | 41/18866  | 2.69E-05 | 0.00026  | 0.000129 | 4 |
| BP | GO:0036293 | 9/80 | 371/18866 | 2.71E-05 | 0.00026  | 0.000129 | 9 |
| BP | GO:0048708 | 5/80 | 83/18866  | 2.71E-05 | 0.00026  | 0.000129 | 5 |
| BP | GO:0046209 | 5/80 | 84/18866  | 2.87E-05 | 0.000275 | 0.000136 | 5 |
| BP | GO:0090130 | 9/80 | 374/18866 | 2.88E-05 | 0.000275 | 0.000136 | 9 |
| BP | GO:0000082 | 8/80 | 287/18866 | 2.92E-05 | 0.000278 | 0.000138 | 8 |
| BP | GO:0001889 | 6/80 | 141/18866 | 2.99E-05 | 0.000284 | 0.00014  | 6 |
| BP | GO:0045844 | 5/80 | 85/18866  | 3.04E-05 | 0.000287 | 0.000142 | 5 |
| BP | GO:0048636 | 5/80 | 85/18866  | 3.04E-05 | 0.000287 | 0.000142 | 5 |
| BP | GO:0043393 | 7/80 | 211/18866 | 3.15E-05 | 0.000297 | 0.000147 | 7 |
| BP | GO:1901863 | 5/80 | 86/18866  | 3.22E-05 | 0.0003   | 0.000148 | 5 |
| BP | GO:0045346 | 3/80 | 15/18866  | 3.22E-05 | 0.0003   | 0.000148 | 3 |
| BP | GO:0045779 | 3/80 | 15/18866  | 3.22E-05 | 0.0003   | 0.000148 | 3 |
| BP | GO:2001028 | 3/80 | 15/18866  | 3.22E-05 | 0.0003   | 0.000148 | 3 |

|    |            |       |           |          |          |          |    |
|----|------------|-------|-----------|----------|----------|----------|----|
| BP | GO:0045598 | 6/80  | 143/18866 | 3.24E-05 | 0.0003   | 0.000149 | 6  |
| BP | GO:0002685 | 7/80  | 212/18866 | 3.25E-05 | 0.000301 | 0.000149 | 7  |
| BP | GO:0030073 | 7/80  | 213/18866 | 3.35E-05 | 0.000308 | 0.000152 | 7  |
| BP | GO:0090276 | 7/80  | 213/18866 | 3.35E-05 | 0.000308 | 0.000152 | 7  |
| BP | GO:0050921 | 6/80  | 144/18866 | 3.36E-05 | 0.000308 | 0.000152 | 6  |
| BP | GO:0061008 | 6/80  | 144/18866 | 3.36E-05 | 0.000308 | 0.000152 | 6  |
| BP | GO:0006909 | 9/80  | 382/18866 | 3.40E-05 | 0.000308 | 0.000152 | 9  |
| BP | GO:0009144 | 5/80  | 87/18866  | 3.40E-05 | 0.000308 | 0.000152 | 5  |
| BP | GO:0060420 | 5/80  | 87/18866  | 3.40E-05 | 0.000308 | 0.000152 | 5  |
| BP | GO:2001057 | 5/80  | 87/18866  | 3.40E-05 | 0.000308 | 0.000152 | 5  |
| BP | GO:0038127 | 6/80  | 145/18866 | 3.50E-05 | 0.000315 | 0.000156 | 6  |
| BP | GO:0043281 | 7/80  | 215/18866 | 3.55E-05 | 0.00032  | 0.000158 | 7  |
| BP | GO:0006066 | 9/80  | 385/18866 | 3.61E-05 | 0.000324 | 0.00016  | 9  |
| BP | GO:1901987 | 10/80 | 486/18866 | 3.85E-05 | 0.000344 | 0.00017  | 10 |
| BP | GO:0007623 | 7/80  | 218/18866 | 3.88E-05 | 0.000346 | 0.000171 | 7  |
| BP | GO:0045429 | 4/80  | 45/18866  | 3.91E-05 | 0.000346 | 0.000171 | 4  |
| BP | GO:0001780 | 3/80  | 16/18866  | 3.95E-05 | 0.000346 | 0.000171 | 3  |
| BP | GO:0002295 | 3/80  | 16/18866  | 3.95E-05 | 0.000346 | 0.000171 | 3  |
| BP | GO:0002523 | 3/80  | 16/18866  | 3.95E-05 | 0.000346 | 0.000171 | 3  |
| BP | GO:0002830 | 3/80  | 16/18866  | 3.95E-05 | 0.000346 | 0.000171 | 3  |
| BP | GO:0006206 | 3/80  | 16/18866  | 3.95E-05 | 0.000346 | 0.000171 | 3  |
| BP | GO:0045342 | 3/80  | 16/18866  | 3.95E-05 | 0.000346 | 0.000171 | 3  |
| BP | GO:0000075 | 7/80  | 219/18866 | 4.00E-05 | 0.000349 | 0.000173 | 7  |
| BP | GO:0006119 | 6/80  | 149/18866 | 4.08E-05 | 0.000355 | 0.000176 | 6  |
| BP | GO:0090068 | 8/80  | 302/18866 | 4.19E-05 | 0.000364 | 0.00018  | 8  |
| BP | GO:0034103 | 5/80  | 91/18866  | 4.22E-05 | 0.000364 | 0.00018  | 5  |
| BP | GO:0046849 | 5/80  | 91/18866  | 4.22E-05 | 0.000364 | 0.00018  | 5  |
| BP | GO:0070665 | 6/80  | 150/18866 | 4.23E-05 | 0.000364 | 0.00018  | 6  |
| BP | GO:0017144 | 4/80  | 46/18866  | 4.27E-05 | 0.000366 | 0.000181 | 4  |
| BP | GO:1904407 | 4/80  | 46/18866  | 4.27E-05 | 0.000366 | 0.000181 | 4  |
| BP | GO:0032388 | 7/80  | 222/18866 | 4.36E-05 | 0.000372 | 0.000184 | 7  |
| BP | GO:0000077 | 6/80  | 151/18866 | 4.39E-05 | 0.000373 | 0.000185 | 6  |
| BP | GO:0006261 | 6/80  | 151/18866 | 4.39E-05 | 0.000373 | 0.000185 | 6  |
| BP | GO:0006631 | 9/80  | 396/18866 | 4.50E-05 | 0.000381 | 0.000189 | 9  |
| BP | GO:0043303 | 4/80  | 47/18866  | 4.65E-05 | 0.000391 | 0.000194 | 4  |
| BP | GO:0046638 | 4/80  | 47/18866  | 4.65E-05 | 0.000391 | 0.000194 | 4  |
| BP | GO:0070849 | 4/80  | 47/18866  | 4.65E-05 | 0.000391 | 0.000194 | 4  |
| BP | GO:0032677 | 5/80  | 93/18866  | 4.69E-05 | 0.000393 | 0.000195 | 5  |
| BP | GO:0045834 | 6/80  | 153/18866 | 4.73E-05 | 0.000395 | 0.000196 | 6  |
| BP | GO:0046851 | 3/80  | 17/18866  | 4.78E-05 | 0.000399 | 0.000197 | 3  |
| BP | GO:1904035 | 5/80  | 94/18866  | 4.94E-05 | 0.000411 | 0.000203 | 5  |
| BP | GO:0016236 | 8/80  | 310/18866 | 5.04E-05 | 0.000417 | 0.000207 | 8  |
| BP | GO:0044843 | 8/80  | 310/18866 | 5.04E-05 | 0.000417 | 0.000207 | 8  |
| BP | GO:0002279 | 4/80  | 48/18866  | 5.06E-05 | 0.000418 | 0.000207 | 4  |
| BP | GO:0002448 | 4/80  | 49/18866  | 5.49E-05 | 0.00045  | 0.000223 | 4  |
| BP | GO:0002673 | 4/80  | 49/18866  | 5.49E-05 | 0.00045  | 0.000223 | 4  |
| BP | GO:0003254 | 4/80  | 49/18866  | 5.49E-05 | 0.00045  | 0.000223 | 4  |
| BP | GO:0070230 | 3/80  | 18/18866  | 5.72E-05 | 0.000468 | 0.000231 | 3  |
| BP | GO:0071674 | 5/80  | 97/18866  | 5.74E-05 | 0.000468 | 0.000232 | 5  |
| BP | GO:0001774 | 4/80  | 50/18866  | 5.95E-05 | 0.000477 | 0.000236 | 4  |
| BP | GO:0002269 | 4/80  | 50/18866  | 5.95E-05 | 0.000477 | 0.000236 | 4  |
| BP | GO:0002711 | 4/80  | 50/18866  | 5.95E-05 | 0.000477 | 0.000236 | 4  |
| BP | GO:0045981 | 4/80  | 50/18866  | 5.95E-05 | 0.000477 | 0.000236 | 4  |
| BP | GO:0101023 | 4/80  | 50/18866  | 5.95E-05 | 0.000477 | 0.000236 | 4  |
| BP | GO:1900544 | 4/80  | 50/18866  | 5.95E-05 | 0.000477 | 0.000236 | 4  |
| BP | GO:1905562 | 4/80  | 50/18866  | 5.95E-05 | 0.000477 | 0.000236 | 4  |
| BP | GO:0048010 | 5/80  | 98/18866  | 6.03E-05 | 0.000482 | 0.000238 | 5  |
| BP | GO:0001503 | 9/80  | 412/18866 | 6.10E-05 | 0.000486 | 0.000241 | 9  |

|    |            |      |           |          |          |          |   |
|----|------------|------|-----------|----------|----------|----------|---|
| BP | GO:2001233 | 9/80 | 413/18866 | 6.22E-05 | 0.000494 | 0.000245 | 9 |
| BP | GO:0031570 | 6/80 | 161/18866 | 6.28E-05 | 0.000498 | 0.000246 | 6 |
| BP | GO:1902652 | 6/80 | 162/18866 | 6.50E-05 | 0.000514 | 0.000254 | 6 |
| BP | GO:0070301 | 5/80 | 100/18866 | 6.64E-05 | 0.000524 | 0.000259 | 5 |
| BP | GO:0009267 | 6/80 | 163/18866 | 6.72E-05 | 0.000529 | 0.000262 | 6 |
| BP | GO:0043373 | 3/80 | 19/18866  | 6.77E-05 | 0.000531 | 0.000263 | 3 |
| BP | GO:0070989 | 3/80 | 19/18866  | 6.77E-05 | 0.000531 | 0.000263 | 3 |
| BP | GO:2000116 | 7/80 | 239/18866 | 6.94E-05 | 0.000541 | 0.000268 | 7 |
| BP | GO:0032637 | 5/80 | 101/18866 | 6.96E-05 | 0.000541 | 0.000268 | 5 |
| BP | GO:0060191 | 5/80 | 101/18866 | 6.96E-05 | 0.000541 | 0.000268 | 5 |
| BP | GO:0055024 | 5/80 | 102/18866 | 7.30E-05 | 0.000566 | 0.00028  | 5 |
| BP | GO:0061756 | 4/80 | 53/18866  | 7.50E-05 | 0.00058  | 0.000287 | 4 |
| BP | GO:0030593 | 5/80 | 103/18866 | 7.64E-05 | 0.00059  | 0.000292 | 5 |
| BP | GO:0071375 | 8/80 | 330/18866 | 7.81E-05 | 0.000602 | 0.000298 | 8 |
| BP | GO:0002320 | 3/80 | 20/18866  | 7.95E-05 | 0.000609 | 0.000302 | 3 |
| BP | GO:2001169 | 3/80 | 20/18866  | 7.95E-05 | 0.000609 | 0.000302 | 3 |
| BP | GO:0002367 | 5/80 | 104/18866 | 8.00E-05 | 0.000611 | 0.000302 | 5 |
| BP | GO:0043279 | 5/80 | 104/18866 | 8.00E-05 | 0.000611 | 0.000302 | 5 |
| BP | GO:0032757 | 4/80 | 54/18866  | 8.07E-05 | 0.000614 | 0.000304 | 4 |
| BP | GO:0044070 | 5/80 | 105/18866 | 8.37E-05 | 0.000635 | 0.000314 | 5 |
| BP | GO:0045621 | 5/80 | 105/18866 | 8.37E-05 | 0.000635 | 0.000314 | 5 |
| BP | GO:0032102 | 9/80 | 433/18866 | 8.93E-05 | 0.000675 | 0.000334 | 9 |
| BP | GO:0055017 | 5/80 | 107/18866 | 9.16E-05 | 0.000691 | 0.000342 | 5 |
| BP | GO:0009636 | 7/80 | 250/18866 | 9.20E-05 | 0.000691 | 0.000342 | 7 |
| BP | GO:0002363 | 3/80 | 21/18866  | 9.24E-05 | 0.000691 | 0.000342 | 3 |
| BP | GO:0006123 | 3/80 | 21/18866  | 9.24E-05 | 0.000691 | 0.000342 | 3 |
| BP | GO:0019646 | 3/80 | 21/18866  | 9.24E-05 | 0.000691 | 0.000342 | 3 |
| BP | GO:0010332 | 4/80 | 56/18866  | 9.31E-05 | 0.000693 | 0.000343 | 4 |
| BP | GO:0070228 | 4/80 | 56/18866  | 9.31E-05 | 0.000693 | 0.000343 | 4 |
| BP | GO:1901991 | 7/80 | 251/18866 | 9.43E-05 | 0.0007   | 0.000347 | 7 |
| BP | GO:0031668 | 7/80 | 253/18866 | 9.91E-05 | 0.000734 | 0.000363 | 7 |
| BP | GO:0042743 | 4/80 | 57/18866  | 9.98E-05 | 0.000734 | 0.000363 | 4 |
| BP | GO:0072431 | 4/80 | 57/18866  | 9.98E-05 | 0.000734 | 0.000363 | 4 |
| BP | GO:1902400 | 4/80 | 57/18866  | 9.98E-05 | 0.000734 | 0.000363 | 4 |
| BP | GO:0016042 | 8/80 | 343/18866 | 0.000102 | 0.00075  | 0.000371 | 8 |
| BP | GO:0006925 | 3/80 | 22/18866  | 0.000107 | 0.00077  | 0.000381 | 3 |
| BP | GO:0034104 | 3/80 | 22/18866  | 0.000107 | 0.00077  | 0.000381 | 3 |
| BP | GO:0042359 | 3/80 | 22/18866  | 0.000107 | 0.00077  | 0.000381 | 3 |
| BP | GO:0043369 | 3/80 | 22/18866  | 0.000107 | 0.00077  | 0.000381 | 3 |
| BP | GO:0019369 | 4/80 | 58/18866  | 0.000107 | 0.00077  | 0.000381 | 4 |
| BP | GO:0035306 | 4/80 | 58/18866  | 0.000107 | 0.00077  | 0.000381 | 4 |
| BP | GO:1900408 | 4/80 | 58/18866  | 0.000107 | 0.00077  | 0.000381 | 4 |
| BP | GO:1903202 | 4/80 | 58/18866  | 0.000107 | 0.00077  | 0.000381 | 4 |
| BP | GO:1901342 | 9/80 | 444/18866 | 0.000108 | 0.000776 | 0.000384 | 9 |
| BP | GO:0042742 | 8/80 | 348/18866 | 0.000113 | 0.000805 | 0.000399 | 8 |
| BP | GO:0046822 | 5/80 | 112/18866 | 0.000114 | 0.000805 | 0.000399 | 5 |
| BP | GO:0031663 | 4/80 | 59/18866  | 0.000114 | 0.000805 | 0.000399 | 4 |
| BP | GO:0043030 | 4/80 | 59/18866  | 0.000114 | 0.000805 | 0.000399 | 4 |
| BP | GO:0050707 | 4/80 | 59/18866  | 0.000114 | 0.000805 | 0.000399 | 4 |
| BP | GO:0060043 | 4/80 | 59/18866  | 0.000114 | 0.000805 | 0.000399 | 4 |
| BP | GO:0072413 | 4/80 | 59/18866  | 0.000114 | 0.000805 | 0.000399 | 4 |
| BP | GO:1902402 | 4/80 | 59/18866  | 0.000114 | 0.000805 | 0.000399 | 4 |
| BP | GO:1902403 | 4/80 | 59/18866  | 0.000114 | 0.000805 | 0.000399 | 4 |
| BP | GO:1901990 | 9/80 | 448/18866 | 0.000116 | 0.000813 | 0.000402 | 9 |
| BP | GO:0001676 | 5/80 | 113/18866 | 0.000119 | 0.000832 | 0.000412 | 5 |
| BP | GO:0006417 | 9/80 | 450/18866 | 0.00012  | 0.000833 | 0.000413 | 9 |
| BP | GO:0010950 | 6/80 | 181/18866 | 0.00012  | 0.000833 | 0.000413 | 6 |
| BP | GO:0045619 | 6/80 | 181/18866 | 0.00012  | 0.000833 | 0.000413 | 6 |



|    |            |      |           |          |          |          |   |
|----|------------|------|-----------|----------|----------|----------|---|
| BP | GO:0050796 | 6/80 | 181/18866 | 0.00012  | 0.000833 | 0.000413 | 6 |
| BP | GO:0050994 | 4/80 | 60/18866  | 0.000122 | 0.000842 | 0.000417 | 4 |
| BP | GO:1902883 | 4/80 | 60/18866  | 0.000122 | 0.000842 | 0.000417 | 4 |
| BP | GO:1901032 | 3/80 | 23/18866  | 0.000122 | 0.000842 | 0.000417 | 3 |
| BP | GO:1903206 | 3/80 | 23/18866  | 0.000122 | 0.000842 | 0.000417 | 3 |
| BP | GO:1903798 | 3/80 | 23/18866  | 0.000122 | 0.000842 | 0.000417 | 3 |
| BP | GO:0001959 | 6/80 | 183/18866 | 0.000127 | 0.000872 | 0.000432 | 6 |
| BP | GO:1903034 | 6/80 | 183/18866 | 0.000127 | 0.000872 | 0.000432 | 6 |
| BP | GO:0060419 | 5/80 | 115/18866 | 0.000129 | 0.000881 | 0.000436 | 5 |
| BP | GO:0006644 | 9/80 | 455/18866 | 0.00013  | 0.000886 | 0.000439 | 9 |
| BP | GO:0019932 | 9/80 | 456/18866 | 0.000132 | 0.000897 | 0.000444 | 9 |
| BP | GO:0062012 | 9/80 | 456/18866 | 0.000132 | 0.000897 | 0.000444 | 9 |
| BP | GO:0009165 | 7/80 | 266/18866 | 0.000135 | 0.000917 | 0.000454 | 7 |
| BP | GO:0032386 | 8/80 | 358/18866 | 0.000137 | 0.000929 | 0.00046  | 8 |
| BP | GO:1903429 | 3/80 | 24/18866  | 0.000139 | 0.000937 | 0.000464 | 3 |
| BP | GO:2000637 | 3/80 | 24/18866  | 0.000139 | 0.000937 | 0.000464 | 3 |
| BP | GO:0051341 | 5/80 | 117/18866 | 0.00014  | 0.000937 | 0.000464 | 5 |
| BP | GO:0072676 | 5/80 | 117/18866 | 0.00014  | 0.000937 | 0.000464 | 5 |
| BP | GO:0001818 | 8/80 | 360/18866 | 0.000143 | 0.000955 | 0.000473 | 8 |
| BP | GO:1901293 | 7/80 | 269/18866 | 0.000145 | 0.000966 | 0.000478 | 7 |
| BP | GO:0006661 | 5/80 | 118/18866 | 0.000145 | 0.000966 | 0.000478 | 5 |
| BP | GO:0006805 | 5/80 | 118/18866 | 0.000145 | 0.000966 | 0.000478 | 5 |
| BP | GO:0007569 | 5/80 | 118/18866 | 0.000145 | 0.000966 | 0.000478 | 5 |
| BP | GO:0031571 | 4/80 | 63/18866  | 0.000148 | 0.000977 | 0.000483 | 4 |
| BP | GO:0046635 | 4/80 | 63/18866  | 0.000148 | 0.000977 | 0.000483 | 4 |
| BP | GO:0052547 | 9/80 | 466/18866 | 0.000155 | 0.001026 | 0.000508 | 9 |
| BP | GO:0044783 | 4/80 | 64/18866  | 0.000157 | 0.001027 | 0.000509 | 4 |
| BP | GO:0044819 | 4/80 | 64/18866  | 0.000157 | 0.001027 | 0.000509 | 4 |
| BP | GO:0046637 | 4/80 | 64/18866  | 0.000157 | 0.001027 | 0.000509 | 4 |
| BP | GO:0032647 | 3/80 | 25/18866  | 0.000158 | 0.001027 | 0.000509 | 3 |
| BP | GO:0060148 | 3/80 | 25/18866  | 0.000158 | 0.001027 | 0.000509 | 3 |
| BP | GO:0070920 | 3/80 | 25/18866  | 0.000158 | 0.001027 | 0.000509 | 3 |
| BP | GO:2001026 | 3/80 | 25/18866  | 0.000158 | 0.001027 | 0.000509 | 3 |
| BP | GO:0010821 | 6/80 | 191/18866 | 0.000161 | 0.001041 | 0.000515 | 6 |
| BP | GO:0035265 | 6/80 | 191/18866 | 0.000161 | 0.001041 | 0.000515 | 6 |
| BP | GO:1900542 | 5/80 | 121/18866 | 0.000164 | 0.001058 | 0.000524 | 5 |
| BP | GO:0031640 | 4/80 | 65/18866  | 0.000167 | 0.001076 | 0.000533 | 4 |
| BP | GO:0006690 | 5/80 | 122/18866 | 0.00017  | 0.001089 | 0.000539 | 5 |
| BP | GO:0042752 | 5/80 | 122/18866 | 0.00017  | 0.001089 | 0.000539 | 5 |
| BP | GO:1990266 | 5/80 | 122/18866 | 0.00017  | 0.001089 | 0.000539 | 5 |
| BP | GO:0071248 | 6/80 | 193/18866 | 0.00017  | 0.001089 | 0.000539 | 6 |
| BP | GO:0002460 | 8/80 | 370/18866 | 0.000172 | 0.001099 | 0.000544 | 8 |
| BP | GO:0006140 | 5/80 | 123/18866 | 0.000177 | 0.001124 | 0.000557 | 5 |
| BP | GO:0071466 | 5/80 | 123/18866 | 0.000177 | 0.001124 | 0.000557 | 5 |
| BP | GO:0032768 | 4/80 | 66/18866  | 0.000177 | 0.001124 | 0.000557 | 4 |
| BP | GO:0006721 | 5/80 | 124/18866 | 0.000183 | 0.001163 | 0.000576 | 5 |
| BP | GO:0007565 | 6/80 | 196/18866 | 0.000185 | 0.001165 | 0.000577 | 6 |
| BP | GO:0050728 | 6/80 | 196/18866 | 0.000185 | 0.001165 | 0.000577 | 6 |
| BP | GO:0060759 | 6/80 | 196/18866 | 0.000185 | 0.001165 | 0.000577 | 6 |
| BP | GO:0007040 | 4/80 | 67/18866  | 0.000188 | 0.001173 | 0.000581 | 4 |
| BP | GO:0072678 | 4/80 | 67/18866  | 0.000188 | 0.001173 | 0.000581 | 4 |
| BP | GO:0080171 | 4/80 | 67/18866  | 0.000188 | 0.001173 | 0.000581 | 4 |
| BP | GO:1900015 | 4/80 | 67/18866  | 0.000188 | 0.001173 | 0.000581 | 4 |
| BP | GO:0032479 | 5/80 | 125/18866 | 0.00019  | 0.001189 | 0.000589 | 5 |
| BP | GO:0043112 | 6/80 | 198/18866 | 0.000195 | 0.001217 | 0.000602 | 6 |
| BP | GO:0001667 | 9/80 | 481/18866 | 0.000197 | 0.001224 | 0.000606 | 9 |
| BP | GO:0032607 | 3/80 | 27/18866  | 0.0002   | 0.001236 | 0.000612 | 3 |
| BP | GO:0048143 | 3/80 | 27/18866  | 0.0002   | 0.001236 | 0.000612 | 3 |

|    |            |      |           |          |          |          |   |
|----|------------|------|-----------|----------|----------|----------|---|
| BP | GO:0032606 | 5/80 | 127/18866 | 0.000205 | 0.001266 | 0.000627 | 5 |
| BP | GO:1905477 | 5/80 | 127/18866 | 0.000205 | 0.001266 | 0.000627 | 5 |
| BP | GO:0060038 | 4/80 | 69/18866  | 0.00021  | 0.001295 | 0.000641 | 4 |
| BP | GO:2000191 | 3/80 | 28/18866  | 0.000223 | 0.00137  | 0.000678 | 3 |
| BP | GO:0009410 | 5/80 | 130/18866 | 0.000229 | 0.001403 | 0.000694 | 5 |
| BP | GO:0097193 | 7/80 | 290/18866 | 0.00023  | 0.001405 | 0.000696 | 7 |
| BP | GO:1902105 | 7/80 | 290/18866 | 0.00023  | 0.001405 | 0.000696 | 7 |
| BP | GO:0042594 | 6/80 | 206/18866 | 0.000242 | 0.001476 | 0.000731 | 6 |
| BP | GO:0051604 | 7/80 | 293/18866 | 0.000245 | 0.001489 | 0.000737 | 7 |
| BP | GO:0006282 | 5/80 | 132/18866 | 0.000245 | 0.001489 | 0.000737 | 5 |
| BP | GO:0010595 | 5/80 | 132/18866 | 0.000245 | 0.001489 | 0.000737 | 5 |
| BP | GO:0033032 | 3/80 | 29/18866  | 0.000248 | 0.001498 | 0.000741 | 3 |
| BP | GO:0043032 | 3/80 | 29/18866  | 0.000248 | 0.001498 | 0.000741 | 3 |
| BP | GO:1903706 | 9/80 | 498/18866 | 0.000255 | 0.001536 | 0.00076  | 9 |
| BP | GO:0002709 | 4/80 | 73/18866  | 0.000261 | 0.001573 | 0.000779 | 4 |
| BP | GO:0043280 | 5/80 | 134/18866 | 0.000263 | 0.001582 | 0.000783 | 5 |
| BP | GO:0002573 | 6/80 | 210/18866 | 0.000268 | 0.001606 | 0.000795 | 6 |
| BP | GO:0006109 | 6/80 | 210/18866 | 0.000268 | 0.001606 | 0.000795 | 6 |
| BP | GO:0043457 | 3/80 | 30/18866  | 0.000274 | 0.001637 | 0.00081  | 3 |
| BP | GO:1903205 | 3/80 | 30/18866  | 0.000274 | 0.001637 | 0.00081  | 3 |
| BP | GO:0002703 | 6/80 | 211/18866 | 0.000275 | 0.001637 | 0.00081  | 6 |
| BP | GO:0032481 | 4/80 | 74/18866  | 0.000275 | 0.001637 | 0.00081  | 4 |
| BP | GO:1901653 | 8/80 | 398/18866 | 0.000282 | 0.001669 | 0.000826 | 8 |
| BP | GO:0050671 | 5/80 | 136/18866 | 0.000282 | 0.001669 | 0.000826 | 5 |
| BP | GO:0010632 | 7/80 | 301/18866 | 0.000288 | 0.001704 | 0.000843 | 7 |
| BP | GO:0032418 | 4/80 | 75/18866  | 0.00029  | 0.001704 | 0.000844 | 4 |
| BP | GO:0043627 | 4/80 | 75/18866  | 0.00029  | 0.001704 | 0.000844 | 4 |
| BP | GO:0050805 | 4/80 | 75/18866  | 0.00029  | 0.001704 | 0.000844 | 4 |
| BP | GO:0032946 | 5/80 | 137/18866 | 0.000292 | 0.001711 | 0.000847 | 5 |
| BP | GO:0043523 | 6/80 | 214/18866 | 0.000297 | 0.001739 | 0.000861 | 6 |
| BP | GO:0002705 | 5/80 | 138/18866 | 0.000302 | 0.001763 | 0.000873 | 5 |
| BP | GO:0002675 | 3/80 | 31/18866  | 0.000303 | 0.001765 | 0.000874 | 3 |
| BP | GO:0002828 | 3/80 | 31/18866  | 0.000303 | 0.001765 | 0.000874 | 3 |
| BP | GO:0045765 | 8/80 | 403/18866 | 0.000306 | 0.001782 | 0.000882 | 8 |
| BP | GO:0048511 | 7/80 | 305/18866 | 0.000312 | 0.001812 | 0.000897 | 7 |
| BP | GO:0002440 | 7/80 | 306/18866 | 0.000318 | 0.001845 | 0.000913 | 7 |
| BP | GO:1902749 | 6/80 | 217/18866 | 0.00032  | 0.00185  | 0.000916 | 6 |
| BP | GO:0032355 | 5/80 | 141/18866 | 0.000333 | 0.001914 | 0.000948 | 5 |
| BP | GO:0008210 | 3/80 | 32/18866  | 0.000333 | 0.001914 | 0.000948 | 3 |
| BP | GO:0035767 | 3/80 | 32/18866  | 0.000333 | 0.001914 | 0.000948 | 3 |
| BP | GO:0038128 | 3/80 | 32/18866  | 0.000333 | 0.001914 | 0.000948 | 3 |
| BP | GO:0042310 | 4/80 | 78/18866  | 0.000337 | 0.001932 | 0.000956 | 4 |
| BP | GO:0002687 | 5/80 | 142/18866 | 0.000344 | 0.001969 | 0.000975 | 5 |
| BP | GO:0031669 | 6/80 | 221/18866 | 0.000352 | 0.002014 | 0.000997 | 6 |
| BP | GO:0009205 | 4/80 | 79/18866  | 0.000354 | 0.002014 | 0.000997 | 4 |
| BP | GO:0043536 | 4/80 | 79/18866  | 0.000354 | 0.002014 | 0.000997 | 4 |
| BP | GO:0043552 | 3/80 | 33/18866  | 0.000365 | 0.002077 | 0.001028 | 3 |
| BP | GO:0006720 | 5/80 | 144/18866 | 0.000367 | 0.002077 | 0.001028 | 5 |
| BP | GO:0010212 | 5/80 | 144/18866 | 0.000367 | 0.002077 | 0.001028 | 5 |
| BP | GO:0002699 | 6/80 | 223/18866 | 0.00037  | 0.002087 | 0.001033 | 6 |
| BP | GO:0016485 | 6/80 | 223/18866 | 0.00037  | 0.002087 | 0.001033 | 6 |
| BP | GO:0010833 | 4/80 | 81/18866  | 0.000389 | 0.002193 | 0.001085 | 4 |
| BP | GO:0032869 | 6/80 | 226/18866 | 0.000397 | 0.00222  | 0.001099 | 6 |
| BP | GO:0044706 | 6/80 | 226/18866 | 0.000397 | 0.00222  | 0.001099 | 6 |
| BP | GO:0010922 | 3/80 | 34/18866  | 0.0004   | 0.00222  | 0.001099 | 3 |
| BP | GO:0036474 | 3/80 | 34/18866  | 0.0004   | 0.00222  | 0.001099 | 3 |
| BP | GO:0043276 | 3/80 | 34/18866  | 0.0004   | 0.00222  | 0.001099 | 3 |
| BP | GO:0045648 | 3/80 | 34/18866  | 0.0004   | 0.00222  | 0.001099 | 3 |

|    |            |      |           |          |          |          |   |
|----|------------|------|-----------|----------|----------|----------|---|
| BP | GO:0045907 | 3/80 | 34/18866  | 0.0004   | 0.00222  | 0.001099 | 3 |
| BP | GO:0070102 | 3/80 | 34/18866  | 0.0004   | 0.00222  | 0.001099 | 3 |
| BP | GO:0031644 | 5/80 | 148/18866 | 0.000416 | 0.002307 | 0.001142 | 5 |
| BP | GO:0031145 | 4/80 | 83/18866  | 0.000427 | 0.002365 | 0.001171 | 4 |
| BP | GO:0043524 | 5/80 | 149/18866 | 0.000429 | 0.002371 | 0.001174 | 5 |
| BP | GO:0046474 | 6/80 | 230/18866 | 0.000436 | 0.002396 | 0.001186 | 6 |
| BP | GO:0097191 | 6/80 | 230/18866 | 0.000436 | 0.002396 | 0.001186 | 6 |
| BP | GO:0009112 | 3/80 | 35/18866  | 0.000436 | 0.002396 | 0.001186 | 3 |
| BP | GO:0045580 | 5/80 | 150/18866 | 0.000442 | 0.002428 | 0.001202 | 5 |
| BP | GO:0061041 | 5/80 | 151/18866 | 0.000456 | 0.002492 | 0.001234 | 5 |
| BP | GO:2001056 | 5/80 | 151/18866 | 0.000456 | 0.002492 | 0.001234 | 5 |
| BP | GO:0050851 | 7/80 | 325/18866 | 0.000457 | 0.002492 | 0.001234 | 7 |
| BP | GO:0070371 | 7/80 | 325/18866 | 0.000457 | 0.002492 | 0.001234 | 7 |
| BP | GO:0009266 | 6/80 | 233/18866 | 0.000467 | 0.002537 | 0.001256 | 6 |
| BP | GO:0009199 | 4/80 | 85/18866  | 0.000468 | 0.002537 | 0.001256 | 4 |
| BP | GO:2000779 | 4/80 | 85/18866  | 0.000468 | 0.002537 | 0.001256 | 4 |
| BP | GO:0007050 | 6/80 | 234/18866 | 0.000477 | 0.002585 | 0.00128  | 6 |
| BP | GO:0002822 | 5/80 | 153/18866 | 0.000484 | 0.00261  | 0.001292 | 5 |
| BP | GO:0008203 | 5/80 | 153/18866 | 0.000484 | 0.00261  | 0.001292 | 5 |
| BP | GO:0016202 | 5/80 | 153/18866 | 0.000484 | 0.00261  | 0.001292 | 5 |
| BP | GO:0045444 | 6/80 | 235/18866 | 0.000488 | 0.002622 | 0.001298 | 6 |
| BP | GO:1904018 | 6/80 | 235/18866 | 0.000488 | 0.002622 | 0.001298 | 6 |
| BP | GO:0097756 | 4/80 | 86/18866  | 0.000489 | 0.002622 | 0.001298 | 4 |
| BP | GO:0002706 | 5/80 | 154/18866 | 0.000499 | 0.002666 | 0.00132  | 5 |
| BP | GO:0062013 | 5/80 | 154/18866 | 0.000499 | 0.002666 | 0.00132  | 5 |
| BP | GO:0052548 | 8/80 | 434/18866 | 0.000501 | 0.002675 | 0.001324 | 8 |
| BP | GO:0009060 | 4/80 | 87/18866  | 0.000511 | 0.002717 | 0.001345 | 4 |
| BP | GO:0032436 | 4/80 | 87/18866  | 0.000511 | 0.002717 | 0.001345 | 4 |
| BP | GO:0090218 | 3/80 | 37/18866  | 0.000514 | 0.00273  | 0.001351 | 3 |
| BP | GO:0001890 | 5/80 | 156/18866 | 0.000529 | 0.0028   | 0.001386 | 5 |
| BP | GO:1901861 | 5/80 | 156/18866 | 0.000529 | 0.0028   | 0.001386 | 5 |
| BP | GO:0048634 | 5/80 | 157/18866 | 0.000545 | 0.002877 | 0.001424 | 5 |
| BP | GO:0001892 | 4/80 | 89/18866  | 0.000557 | 0.002936 | 0.001453 | 4 |
| BP | GO:0038093 | 6/80 | 241/18866 | 0.000558 | 0.002936 | 0.001453 | 6 |
| BP | GO:1902107 | 5/80 | 159/18866 | 0.000577 | 0.003033 | 0.001501 | 5 |
| BP | GO:0060416 | 3/80 | 39/18866  | 0.000601 | 0.003155 | 0.001562 | 3 |
| BP | GO:0033273 | 4/80 | 91/18866  | 0.000606 | 0.003168 | 0.001568 | 4 |
| BP | GO:0051899 | 4/80 | 91/18866  | 0.000606 | 0.003168 | 0.001568 | 4 |
| BP | GO:0051402 | 6/80 | 245/18866 | 0.000608 | 0.003175 | 0.001572 | 6 |
| BP | GO:0000723 | 5/80 | 161/18866 | 0.000611 | 0.003184 | 0.001576 | 5 |
| BP | GO:0045582 | 4/80 | 92/18866  | 0.000631 | 0.003286 | 0.001626 | 4 |
| BP | GO:1903427 | 3/80 | 40/18866  | 0.000648 | 0.003368 | 0.001667 | 3 |
| BP | GO:1901992 | 4/80 | 94/18866  | 0.000684 | 0.003552 | 0.001758 | 4 |
| BP | GO:0033574 | 3/80 | 41/18866  | 0.000697 | 0.003605 | 0.001784 | 3 |
| BP | GO:0071548 | 3/80 | 41/18866  | 0.000697 | 0.003605 | 0.001784 | 3 |
| BP | GO:0007093 | 5/80 | 166/18866 | 0.000701 | 0.00361  | 0.001787 | 5 |
| BP | GO:0009408 | 5/80 | 166/18866 | 0.000701 | 0.00361  | 0.001787 | 5 |
| BP | GO:2001242 | 5/80 | 166/18866 | 0.000701 | 0.00361  | 0.001787 | 5 |
| BP | GO:0097194 | 4/80 | 95/18866  | 0.000712 | 0.003661 | 0.001812 | 4 |
| BP | GO:0002819 | 5/80 | 168/18866 | 0.00074  | 0.003798 | 0.00188  | 5 |
| BP | GO:0006509 | 3/80 | 42/18866  | 0.000748 | 0.003809 | 0.001886 | 3 |
| BP | GO:0048246 | 3/80 | 42/18866  | 0.000748 | 0.003809 | 0.001886 | 3 |
| BP | GO:0051602 | 3/80 | 42/18866  | 0.000748 | 0.003809 | 0.001886 | 3 |
| BP | GO:1900371 | 3/80 | 42/18866  | 0.000748 | 0.003809 | 0.001886 | 3 |
| BP | GO:1904037 | 3/80 | 42/18866  | 0.000748 | 0.003809 | 0.001886 | 3 |
| BP | GO:0016125 | 5/80 | 169/18866 | 0.00076  | 0.003858 | 0.00191  | 5 |
| BP | GO:0038095 | 5/80 | 169/18866 | 0.00076  | 0.003858 | 0.00191  | 5 |
| BP | GO:0046634 | 4/80 | 97/18866  | 0.00077  | 0.003903 | 0.001932 | 4 |

|    |            |      |           |          |          |          |   |
|----|------------|------|-----------|----------|----------|----------|---|
| BP | GO:0002676 | 2/80 | 10/18866  | 0.000782 | 0.003936 | 0.001949 | 2 |
| BP | GO:0014041 | 2/80 | 10/18866  | 0.000782 | 0.003936 | 0.001949 | 2 |
| BP | GO:0045792 | 2/80 | 10/18866  | 0.000782 | 0.003936 | 0.001949 | 2 |
| BP | GO:1903431 | 2/80 | 10/18866  | 0.000782 | 0.003936 | 0.001949 | 2 |
| BP | GO:2001243 | 4/80 | 98/18866  | 0.0008   | 0.003988 | 0.001974 | 4 |
| BP | GO:0007584 | 5/80 | 171/18866 | 0.000801 | 0.003988 | 0.001974 | 5 |
| BP | GO:0030307 | 5/80 | 171/18866 | 0.000801 | 0.003988 | 0.001974 | 5 |
| BP | GO:0008631 | 3/80 | 43/18866  | 0.000802 | 0.003988 | 0.001974 | 3 |
| BP | GO:0030808 | 3/80 | 43/18866  | 0.000802 | 0.003988 | 0.001974 | 3 |
| BP | GO:0046688 | 3/80 | 43/18866  | 0.000802 | 0.003988 | 0.001974 | 3 |
| BP | GO:0071364 | 3/80 | 43/18866  | 0.000802 | 0.003988 | 0.001974 | 3 |
| BP | GO:1901031 | 3/80 | 43/18866  | 0.000802 | 0.003988 | 0.001974 | 3 |
| BP | GO:0016570 | 8/80 | 468/18866 | 0.000821 | 0.004075 | 0.002017 | 8 |
| BP | GO:0002244 | 5/80 | 172/18866 | 0.000823 | 0.00408  | 0.00202  | 5 |
| BP | GO:0050830 | 4/80 | 99/18866  | 0.000831 | 0.004116 | 0.002038 | 4 |
| BP | GO:0002697 | 8/80 | 470/18866 | 0.000843 | 0.00417  | 0.002064 | 8 |
| BP | GO:0001894 | 6/80 | 261/18866 | 0.000846 | 0.004173 | 0.002066 | 6 |
| BP | GO:0035307 | 3/80 | 44/18866  | 0.000858 | 0.004222 | 0.00209  | 3 |
| BP | GO:0060612 | 3/80 | 44/18866  | 0.000858 | 0.004222 | 0.00209  | 3 |
| BP | GO:0050848 | 4/80 | 100/18866 | 0.000863 | 0.004241 | 0.0021   | 4 |
| BP | GO:0032200 | 5/80 | 174/18866 | 0.000867 | 0.004245 | 0.002101 | 5 |
| BP | GO:0051099 | 5/80 | 174/18866 | 0.000867 | 0.004245 | 0.002101 | 5 |
| BP | GO:1901568 | 5/80 | 175/18866 | 0.000889 | 0.004349 | 0.002153 | 5 |
| BP | GO:0042102 | 4/80 | 101/18866 | 0.000896 | 0.004362 | 0.002159 | 4 |
| BP | GO:0044773 | 4/80 | 101/18866 | 0.000896 | 0.004362 | 0.002159 | 4 |
| BP | GO:0045639 | 4/80 | 101/18866 | 0.000896 | 0.004362 | 0.002159 | 4 |
| BP | GO:0006775 | 3/80 | 45/18866  | 0.000916 | 0.004435 | 0.002195 | 3 |
| BP | GO:0014002 | 3/80 | 45/18866  | 0.000916 | 0.004435 | 0.002195 | 3 |
| BP | GO:0034198 | 3/80 | 45/18866  | 0.000916 | 0.004435 | 0.002195 | 3 |
| BP | GO:0090311 | 3/80 | 45/18866  | 0.000916 | 0.004435 | 0.002195 | 3 |
| BP | GO:2000060 | 4/80 | 102/18866 | 0.00093  | 0.004492 | 0.002224 | 4 |
| BP | GO:0002328 | 2/80 | 11/18866  | 0.000953 | 0.004556 | 0.002255 | 2 |
| BP | GO:0051712 | 2/80 | 11/18866  | 0.000953 | 0.004556 | 0.002255 | 2 |
| BP | GO:0070106 | 2/80 | 11/18866  | 0.000953 | 0.004556 | 0.002255 | 2 |
| BP | GO:0070673 | 2/80 | 11/18866  | 0.000953 | 0.004556 | 0.002255 | 2 |
| BP | GO:0070757 | 2/80 | 11/18866  | 0.000953 | 0.004556 | 0.002255 | 2 |
| BP | GO:1903800 | 2/80 | 11/18866  | 0.000953 | 0.004556 | 0.002255 | 2 |
| BP | GO:2000551 | 2/80 | 11/18866  | 0.000953 | 0.004556 | 0.002255 | 2 |
| BP | GO:0048771 | 5/80 | 178/18866 | 0.000959 | 0.004582 | 0.002268 | 5 |
| BP | GO:0031641 | 3/80 | 46/18866  | 0.000977 | 0.004641 | 0.002297 | 3 |
| BP | GO:0048538 | 3/80 | 46/18866  | 0.000977 | 0.004641 | 0.002297 | 3 |
| BP | GO:0002429 | 8/80 | 481/18866 | 0.000979 | 0.004641 | 0.002297 | 8 |
| BP | GO:0002757 | 8/80 | 481/18866 | 0.000979 | 0.004641 | 0.002297 | 8 |
| BP | GO:0016569 | 8/80 | 481/18866 | 0.000979 | 0.004641 | 0.002297 | 8 |
| BP | GO:0048469 | 5/80 | 179/18866 | 0.000984 | 0.004657 | 0.002305 | 5 |
| BP | GO:0031348 | 6/80 | 269/18866 | 0.000988 | 0.004671 | 0.002312 | 6 |
| BP | GO:0002456 | 4/80 | 104/18866 | 0.000999 | 0.004717 | 0.002335 | 4 |
| BP | GO:0045017 | 6/80 | 270/18866 | 0.001007 | 0.004748 | 0.00235  | 6 |
| BP | GO:0042326 | 8/80 | 484/18866 | 0.001019 | 0.004795 | 0.002374 | 8 |
| BP | GO:0008654 | 6/80 | 271/18866 | 0.001027 | 0.004825 | 0.002388 | 6 |
| BP | GO:0002824 | 4/80 | 105/18866 | 0.001036 | 0.004855 | 0.002403 | 4 |
| BP | GO:0006953 | 3/80 | 47/18866  | 0.001041 | 0.004855 | 0.002403 | 3 |
| BP | GO:0010569 | 3/80 | 47/18866  | 0.001041 | 0.004855 | 0.002403 | 3 |
| BP | GO:0014075 | 3/80 | 47/18866  | 0.001041 | 0.004855 | 0.002403 | 3 |
| BP | GO:0035722 | 3/80 | 47/18866  | 0.001041 | 0.004855 | 0.002403 | 3 |
| BP | GO:0043312 | 8/80 | 487/18866 | 0.00106  | 0.004938 | 0.002444 | 8 |
| BP | GO:0044839 | 6/80 | 273/18866 | 0.001066 | 0.004961 | 0.002456 | 6 |
| BP | GO:0002708 | 4/80 | 106/18866 | 0.001073 | 0.004976 | 0.002463 | 4 |

|    |            |      |           |          |          |          |   |
|----|------------|------|-----------|----------|----------|----------|---|
| BP | GO:0071156 | 4/80 | 106/18866 | 0.001073 | 0.004976 | 0.002463 | 4 |
| BP | GO:0002283 | 8/80 | 490/18866 | 0.001103 | 0.005107 | 0.002528 | 8 |
| BP | GO:0042220 | 3/80 | 48/18866  | 0.001107 | 0.005111 | 0.00253  | 3 |
| BP | GO:1990928 | 3/80 | 48/18866  | 0.001107 | 0.005111 | 0.00253  | 3 |
| BP | GO:0000018 | 4/80 | 107/18866 | 0.001111 | 0.005123 | 0.002536 | 4 |
| BP | GO:0046488 | 5/80 | 185/18866 | 0.00114  | 0.005191 | 0.00257  | 5 |
| BP | GO:0002551 | 2/80 | 12/18866  | 0.00114  | 0.005191 | 0.00257  | 2 |
| BP | GO:0032494 | 2/80 | 12/18866  | 0.00114  | 0.005191 | 0.00257  | 2 |
| BP | GO:0032621 | 2/80 | 12/18866  | 0.00114  | 0.005191 | 0.00257  | 2 |
| BP | GO:0035404 | 2/80 | 12/18866  | 0.00114  | 0.005191 | 0.00257  | 2 |
| BP | GO:0042368 | 2/80 | 12/18866  | 0.00114  | 0.005191 | 0.00257  | 2 |
| BP | GO:0072540 | 2/80 | 12/18866  | 0.00114  | 0.005191 | 0.00257  | 2 |
| BP | GO:0150065 | 2/80 | 12/18866  | 0.00114  | 0.005191 | 0.00257  | 2 |
| BP | GO:2000105 | 2/80 | 12/18866  | 0.00114  | 0.005191 | 0.00257  | 2 |
| BP | GO:0008593 | 4/80 | 108/18866 | 0.00115  | 0.005214 | 0.002581 | 4 |
| BP | GO:0044774 | 4/80 | 108/18866 | 0.00115  | 0.005214 | 0.002581 | 4 |
| BP | GO:1902750 | 4/80 | 108/18866 | 0.00115  | 0.005214 | 0.002581 | 4 |
| BP | GO:0045165 | 6/80 | 278/18866 | 0.001171 | 0.005299 | 0.002623 | 6 |
| BP | GO:0035196 | 3/80 | 49/18866  | 0.001175 | 0.005299 | 0.002623 | 3 |
| BP | GO:0060711 | 3/80 | 49/18866  | 0.001175 | 0.005299 | 0.002623 | 3 |
| BP | GO:0071349 | 3/80 | 49/18866  | 0.001175 | 0.005299 | 0.002623 | 3 |
| BP | GO:0071478 | 5/80 | 188/18866 | 0.001224 | 0.005511 | 0.002728 | 5 |
| BP | GO:0002821 | 4/80 | 110/18866 | 0.001231 | 0.005519 | 0.002732 | 4 |
| BP | GO:1901800 | 4/80 | 110/18866 | 0.001231 | 0.005519 | 0.002732 | 4 |
| BP | GO:1901989 | 4/80 | 110/18866 | 0.001231 | 0.005519 | 0.002732 | 4 |
| BP | GO:0045646 | 3/80 | 50/18866  | 0.001247 | 0.005566 | 0.002755 | 3 |
| BP | GO:0070671 | 3/80 | 50/18866  | 0.001247 | 0.005566 | 0.002755 | 3 |
| BP | GO:1903727 | 3/80 | 50/18866  | 0.001247 | 0.005566 | 0.002755 | 3 |
| BP | GO:0034440 | 4/80 | 111/18866 | 0.001273 | 0.005675 | 0.002809 | 4 |
| BP | GO:0022408 | 5/80 | 191/18866 | 0.001313 | 0.005839 | 0.002891 | 5 |
| BP | GO:0006275 | 4/80 | 112/18866 | 0.001316 | 0.005839 | 0.002891 | 4 |
| BP | GO:0038084 | 3/80 | 51/18866  | 0.001321 | 0.005839 | 0.002891 | 3 |
| BP | GO:0048146 | 3/80 | 51/18866  | 0.001321 | 0.005839 | 0.002891 | 3 |
| BP | GO:0048255 | 3/80 | 51/18866  | 0.001321 | 0.005839 | 0.002891 | 3 |
| BP | GO:0071354 | 3/80 | 51/18866  | 0.001321 | 0.005839 | 0.002891 | 3 |
| BP | GO:0002679 | 2/80 | 13/18866  | 0.001344 | 0.005885 | 0.002913 | 2 |
| BP | GO:0010623 | 2/80 | 13/18866  | 0.001344 | 0.005885 | 0.002913 | 2 |
| BP | GO:0010870 | 2/80 | 13/18866  | 0.001344 | 0.005885 | 0.002913 | 2 |
| BP | GO:0014842 | 2/80 | 13/18866  | 0.001344 | 0.005885 | 0.002913 | 2 |
| BP | GO:0031053 | 2/80 | 13/18866  | 0.001344 | 0.005885 | 0.002913 | 2 |
| BP | GO:0097531 | 2/80 | 13/18866  | 0.001344 | 0.005885 | 0.002913 | 2 |
| BP | GO:1903236 | 2/80 | 13/18866  | 0.001344 | 0.005885 | 0.002913 | 2 |
| BP | GO:0043542 | 6/80 | 286/18866 | 0.001353 | 0.005912 | 0.002926 | 6 |
| BP | GO:0051403 | 6/80 | 286/18866 | 0.001353 | 0.005912 | 0.002926 | 6 |
| BP | GO:0050999 | 3/80 | 52/18866  | 0.001397 | 0.006095 | 0.003017 | 3 |
| BP | GO:1905475 | 5/80 | 195/18866 | 0.001439 | 0.006268 | 0.003103 | 5 |
| BP | GO:0002040 | 5/80 | 196/18866 | 0.001472 | 0.006395 | 0.003166 | 5 |
| BP | GO:0042176 | 7/80 | 397/18866 | 0.001472 | 0.006395 | 0.003166 | 7 |
| BP | GO:0006754 | 3/80 | 54/18866  | 0.001559 | 0.006675 | 0.003304 | 3 |
| BP | GO:0031050 | 3/80 | 54/18866  | 0.001559 | 0.006675 | 0.003304 | 3 |
| BP | GO:0070918 | 3/80 | 54/18866  | 0.001559 | 0.006675 | 0.003304 | 3 |
| BP | GO:0007100 | 2/80 | 14/18866  | 0.001563 | 0.006675 | 0.003304 | 2 |
| BP | GO:0014841 | 2/80 | 14/18866  | 0.001563 | 0.006675 | 0.003304 | 2 |
| BP | GO:0014854 | 2/80 | 14/18866  | 0.001563 | 0.006675 | 0.003304 | 2 |
| BP | GO:0014857 | 2/80 | 14/18866  | 0.001563 | 0.006675 | 0.003304 | 2 |
| BP | GO:0032042 | 2/80 | 14/18866  | 0.001563 | 0.006675 | 0.003304 | 2 |
| BP | GO:0046512 | 2/80 | 14/18866  | 0.001563 | 0.006675 | 0.003304 | 2 |
| BP | GO:0046520 | 2/80 | 14/18866  | 0.001563 | 0.006675 | 0.003304 | 2 |

|    |            |      |           |          |          |          |   |
|----|------------|------|-----------|----------|----------|----------|---|
| BP | GO:0060397 | 2/80 | 14/18866  | 0.001563 | 0.006675 | 0.003304 | 2 |
| BP | GO:0072672 | 2/80 | 14/18866  | 0.001563 | 0.006675 | 0.003304 | 2 |
| BP | GO:1903799 | 2/80 | 14/18866  | 0.001563 | 0.006675 | 0.003304 | 2 |
| BP | GO:0033559 | 4/80 | 118/18866 | 0.001595 | 0.006801 | 0.003367 | 4 |
| BP | GO:0010389 | 5/80 | 200/18866 | 0.001609 | 0.00685  | 0.003391 | 5 |
| BP | GO:0016233 | 3/80 | 55/18866  | 0.001643 | 0.006974 | 0.003452 | 3 |
| BP | GO:0070741 | 3/80 | 55/18866  | 0.001643 | 0.006974 | 0.003452 | 3 |
| BP | GO:0001763 | 5/80 | 201/18866 | 0.001644 | 0.006974 | 0.003452 | 5 |
| BP | GO:0006310 | 6/80 | 299/18866 | 0.001696 | 0.007184 | 0.003556 | 6 |
| BP | GO:0031098 | 6/80 | 300/18866 | 0.001725 | 0.007297 | 0.003612 | 6 |
| BP | GO:0006977 | 3/80 | 56/18866  | 0.001731 | 0.007305 | 0.003616 | 3 |
| BP | GO:0016447 | 3/80 | 56/18866  | 0.001731 | 0.007305 | 0.003616 | 3 |
| BP | GO:0002831 | 7/80 | 409/18866 | 0.001744 | 0.007349 | 0.003638 | 7 |
| BP | GO:0120254 | 4/80 | 121/18866 | 0.001749 | 0.00736  | 0.003643 | 4 |
| BP | GO:0002281 | 2/80 | 15/18866  | 0.001799 | 0.00745  | 0.003688 | 2 |
| BP | GO:0014856 | 2/80 | 15/18866  | 0.001799 | 0.00745  | 0.003688 | 2 |
| BP | GO:0020027 | 2/80 | 15/18866  | 0.001799 | 0.00745  | 0.003688 | 2 |
| BP | GO:0035745 | 2/80 | 15/18866  | 0.001799 | 0.00745  | 0.003688 | 2 |
| BP | GO:0042362 | 2/80 | 15/18866  | 0.001799 | 0.00745  | 0.003688 | 2 |
| BP | GO:0048308 | 2/80 | 15/18866  | 0.001799 | 0.00745  | 0.003688 | 2 |
| BP | GO:0048313 | 2/80 | 15/18866  | 0.001799 | 0.00745  | 0.003688 | 2 |
| BP | GO:0051299 | 2/80 | 15/18866  | 0.001799 | 0.00745  | 0.003688 | 2 |
| BP | GO:0060391 | 2/80 | 15/18866  | 0.001799 | 0.00745  | 0.003688 | 2 |
| BP | GO:1903960 | 2/80 | 15/18866  | 0.001799 | 0.00745  | 0.003688 | 2 |
| BP | GO:2000402 | 2/80 | 15/18866  | 0.001799 | 0.00745  | 0.003688 | 2 |
| BP | GO:2001171 | 2/80 | 15/18866  | 0.001799 | 0.00745  | 0.003688 | 2 |
| BP | GO:0021782 | 4/80 | 122/18866 | 0.001802 | 0.00745  | 0.003688 | 4 |
| BP | GO:0045471 | 4/80 | 122/18866 | 0.001802 | 0.00745  | 0.003688 | 4 |
| BP | GO:1905517 | 3/80 | 57/18866  | 0.001822 | 0.007521 | 0.003723 | 3 |
| BP | GO:0050852 | 5/80 | 206/18866 | 0.001831 | 0.007549 | 0.003737 | 5 |
| BP | GO:0007173 | 4/80 | 123/18866 | 0.001857 | 0.007646 | 0.003785 | 4 |
| BP | GO:0034284 | 5/80 | 207/18866 | 0.00187  | 0.007681 | 0.003802 | 5 |
| BP | GO:0046890 | 5/80 | 207/18866 | 0.00187  | 0.007681 | 0.003802 | 5 |
| BP | GO:0070372 | 6/80 | 306/18866 | 0.001906 | 0.007787 | 0.003855 | 6 |
| BP | GO:0045766 | 5/80 | 208/18866 | 0.00191  | 0.007787 | 0.003855 | 5 |
| BP | GO:0002688 | 4/80 | 124/18866 | 0.001913 | 0.007787 | 0.003855 | 4 |
| BP | GO:0031929 | 4/80 | 124/18866 | 0.001913 | 0.007787 | 0.003855 | 4 |
| BP | GO:0051101 | 4/80 | 124/18866 | 0.001913 | 0.007787 | 0.003855 | 4 |
| BP | GO:0043489 | 3/80 | 58/18866  | 0.001915 | 0.007787 | 0.003855 | 3 |
| BP | GO:0043551 | 3/80 | 58/18866  | 0.001915 | 0.007787 | 0.003855 | 3 |
| BP | GO:1902373 | 3/80 | 58/18866  | 0.001915 | 0.007787 | 0.003855 | 3 |
| BP | GO:0045088 | 6/80 | 307/18866 | 0.001937 | 0.007866 | 0.003894 | 6 |
| BP | GO:0007098 | 4/80 | 125/18866 | 0.00197  | 0.007968 | 0.003944 | 4 |
| BP | GO:0008637 | 4/80 | 125/18866 | 0.00197  | 0.007968 | 0.003944 | 4 |
| BP | GO:0035270 | 4/80 | 125/18866 | 0.00197  | 0.007968 | 0.003944 | 4 |
| BP | GO:0034764 | 5/80 | 210/18866 | 0.001992 | 0.008046 | 0.003983 | 5 |
| BP | GO:0046456 | 3/80 | 59/18866  | 0.002012 | 0.008108 | 0.004014 | 3 |
| BP | GO:0048008 | 3/80 | 59/18866  | 0.002012 | 0.008108 | 0.004014 | 3 |
| BP | GO:0070555 | 5/80 | 211/18866 | 0.002033 | 0.008184 | 0.004051 | 5 |
| BP | GO:0006268 | 2/80 | 16/18866  | 0.00205  | 0.008201 | 0.00406  | 2 |
| BP | GO:0009263 | 2/80 | 16/18866  | 0.00205  | 0.008201 | 0.00406  | 2 |
| BP | GO:1900451 | 2/80 | 16/18866  | 0.00205  | 0.008201 | 0.00406  | 2 |
| BP | GO:1902969 | 2/80 | 16/18866  | 0.00205  | 0.008201 | 0.00406  | 2 |
| BP | GO:1905050 | 2/80 | 16/18866  | 0.00205  | 0.008201 | 0.00406  | 2 |
| BP | GO:0030278 | 5/80 | 212/18866 | 0.002076 | 0.008292 | 0.004105 | 5 |
| BP | GO:1903052 | 4/80 | 127/18866 | 0.002087 | 0.008328 | 0.004122 | 4 |
| BP | GO:0019229 | 3/80 | 60/18866  | 0.002111 | 0.008404 | 0.00416  | 3 |
| BP | GO:0043388 | 3/80 | 60/18866  | 0.002111 | 0.008404 | 0.00416  | 3 |

|    |            |      |           |          |          |          |   |
|----|------------|------|-----------|----------|----------|----------|---|
| BP | GO:0043161 | 7/80 | 424/18866 | 0.002137 | 0.008497 | 0.004206 | 7 |
| BP | GO:0006006 | 5/80 | 214/18866 | 0.002162 | 0.008584 | 0.004249 | 5 |
| BP | GO:0002576 | 4/80 | 129/18866 | 0.002209 | 0.008726 | 0.004319 | 4 |
| BP | GO:1901657 | 4/80 | 129/18866 | 0.002209 | 0.008726 | 0.004319 | 4 |
| BP | GO:0031343 | 3/80 | 61/18866  | 0.002214 | 0.008726 | 0.004319 | 3 |
| BP | GO:0033619 | 3/80 | 61/18866  | 0.002214 | 0.008726 | 0.004319 | 3 |
| BP | GO:1903078 | 3/80 | 61/18866  | 0.002214 | 0.008726 | 0.004319 | 3 |
| BP | GO:1904356 | 3/80 | 61/18866  | 0.002214 | 0.008726 | 0.004319 | 3 |
| BP | GO:0050665 | 2/80 | 17/18866  | 0.002317 | 0.009097 | 0.004503 | 2 |
| BP | GO:0051969 | 2/80 | 17/18866  | 0.002317 | 0.009097 | 0.004503 | 2 |
| BP | GO:1904355 | 2/80 | 17/18866  | 0.002317 | 0.009097 | 0.004503 | 2 |
| BP | GO:0070527 | 3/80 | 62/18866  | 0.002319 | 0.009097 | 0.004503 | 3 |
| BP | GO:0019218 | 4/80 | 131/18866 | 0.002336 | 0.00913  | 0.00452  | 4 |
| BP | GO:0032434 | 4/80 | 131/18866 | 0.002336 | 0.00913  | 0.00452  | 4 |
| BP | GO:0046887 | 4/80 | 131/18866 | 0.002336 | 0.00913  | 0.00452  | 4 |
| BP | GO:0051656 | 7/80 | 432/18866 | 0.002374 | 0.009265 | 0.004586 | 7 |
| BP | GO:0046486 | 7/80 | 434/18866 | 0.002436 | 0.009496 | 0.0047   | 7 |
| BP | GO:0071333 | 4/80 | 134/18866 | 0.002536 | 0.009853 | 0.004878 | 4 |
| BP | GO:0042130 | 3/80 | 64/18866  | 0.00254  | 0.009853 | 0.004878 | 3 |
| BP | GO:0046173 | 3/80 | 64/18866  | 0.00254  | 0.009853 | 0.004878 | 3 |
| BP | GO:0060135 | 3/80 | 64/18866  | 0.00254  | 0.009853 | 0.004878 | 3 |
| BP | GO:0009200 | 2/80 | 18/18866  | 0.0026   | 0.010026 | 0.004963 | 2 |
| BP | GO:0033194 | 2/80 | 18/18866  | 0.0026   | 0.010026 | 0.004963 | 2 |
| BP | GO:0034501 | 2/80 | 18/18866  | 0.0026   | 0.010026 | 0.004963 | 2 |
| BP | GO:0035994 | 2/80 | 18/18866  | 0.0026   | 0.010026 | 0.004963 | 2 |
| BP | GO:0150078 | 2/80 | 18/18866  | 0.0026   | 0.010026 | 0.004963 | 2 |
| BP | GO:0050853 | 4/80 | 135/18866 | 0.002605 | 0.010035 | 0.004968 | 4 |
| BP | GO:0006687 | 3/80 | 65/18866  | 0.002654 | 0.010189 | 0.005044 | 3 |
| BP | GO:0009206 | 3/80 | 65/18866  | 0.002654 | 0.010189 | 0.005044 | 3 |
| BP | GO:0048247 | 3/80 | 65/18866  | 0.002654 | 0.010189 | 0.005044 | 3 |
| BP | GO:0031023 | 4/80 | 136/18866 | 0.002676 | 0.010245 | 0.005072 | 4 |
| BP | GO:0071331 | 4/80 | 136/18866 | 0.002676 | 0.010245 | 0.005072 | 4 |
| BP | GO:0045732 | 5/80 | 225/18866 | 0.002686 | 0.010272 | 0.005085 | 5 |
| BP | GO:0006163 | 7/80 | 442/18866 | 0.002697 | 0.010302 | 0.005099 | 7 |
| BP | GO:0042391 | 7/80 | 443/18866 | 0.002731 | 0.01042  | 0.005158 | 7 |
| BP | GO:2001020 | 5/80 | 226/18866 | 0.002737 | 0.010433 | 0.005164 | 5 |
| BP | GO:0042552 | 4/80 | 137/18866 | 0.002747 | 0.010433 | 0.005165 | 4 |
| BP | GO:0071326 | 4/80 | 137/18866 | 0.002747 | 0.010433 | 0.005165 | 4 |
| BP | GO:1903038 | 4/80 | 137/18866 | 0.002747 | 0.010433 | 0.005165 | 4 |
| BP | GO:0001933 | 7/80 | 444/18866 | 0.002765 | 0.010455 | 0.005175 | 7 |
| BP | GO:0002562 | 3/80 | 66/18866  | 0.002772 | 0.010455 | 0.005175 | 3 |
| BP | GO:0009145 | 3/80 | 66/18866  | 0.002772 | 0.010455 | 0.005175 | 3 |
| BP | GO:0016444 | 3/80 | 66/18866  | 0.002772 | 0.010455 | 0.005175 | 3 |
| BP | GO:0016445 | 3/80 | 66/18866  | 0.002772 | 0.010455 | 0.005175 | 3 |
| BP | GO:2000378 | 3/80 | 66/18866  | 0.002772 | 0.010455 | 0.005175 | 3 |
| BP | GO:0002548 | 3/80 | 67/18866  | 0.002894 | 0.010727 | 0.00531  | 3 |
| BP | GO:0032890 | 3/80 | 67/18866  | 0.002894 | 0.010727 | 0.00531  | 3 |
| BP | GO:0043550 | 3/80 | 67/18866  | 0.002894 | 0.010727 | 0.00531  | 3 |
| BP | GO:0046513 | 3/80 | 67/18866  | 0.002894 | 0.010727 | 0.00531  | 3 |
| BP | GO:1903672 | 3/80 | 67/18866  | 0.002894 | 0.010727 | 0.00531  | 3 |
| BP | GO:0002433 | 4/80 | 139/18866 | 0.002895 | 0.010727 | 0.00531  | 4 |
| BP | GO:0007272 | 4/80 | 139/18866 | 0.002895 | 0.010727 | 0.00531  | 4 |
| BP | GO:0008366 | 4/80 | 139/18866 | 0.002895 | 0.010727 | 0.00531  | 4 |
| BP | GO:0038096 | 4/80 | 139/18866 | 0.002895 | 0.010727 | 0.00531  | 4 |
| BP | GO:0006670 | 2/80 | 19/18866  | 0.002898 | 0.010727 | 0.00531  | 2 |
| BP | GO:0010759 | 2/80 | 19/18866  | 0.002898 | 0.010727 | 0.00531  | 2 |
| BP | GO:0032930 | 2/80 | 19/18866  | 0.002898 | 0.010727 | 0.00531  | 2 |
| BP | GO:0033189 | 2/80 | 19/18866  | 0.002898 | 0.010727 | 0.00531  | 2 |

|    |            |      |           |          |          |          |   |
|----|------------|------|-----------|----------|----------|----------|---|
| BP | GO:0045780 | 2/80 | 19/18866  | 0.002898 | 0.010727 | 0.00531  | 2 |
| BP | GO:0046852 | 2/80 | 19/18866  | 0.002898 | 0.010727 | 0.00531  | 2 |
| BP | GO:0060252 | 2/80 | 19/18866  | 0.002898 | 0.010727 | 0.00531  | 2 |
| BP | GO:0043254 | 7/80 | 449/18866 | 0.002942 | 0.010879 | 0.005385 | 7 |
| BP | GO:0060968 | 4/80 | 140/18866 | 0.00297  | 0.010958 | 0.005424 | 4 |
| BP | GO:0072655 | 4/80 | 140/18866 | 0.00297  | 0.010958 | 0.005424 | 4 |
| BP | GO:0048738 | 5/80 | 231/18866 | 0.003007 | 0.011033 | 0.005461 | 5 |
| BP | GO:0048568 | 7/80 | 451/18866 | 0.003016 | 0.011033 | 0.005461 | 7 |
| BP | GO:0002637 | 3/80 | 68/18866  | 0.003018 | 0.011033 | 0.005461 | 3 |
| BP | GO:0032642 | 3/80 | 68/18866  | 0.003018 | 0.011033 | 0.005461 | 3 |
| BP | GO:0040014 | 3/80 | 68/18866  | 0.003018 | 0.011033 | 0.005461 | 3 |
| BP | GO:0072577 | 3/80 | 68/18866  | 0.003018 | 0.011033 | 0.005461 | 3 |
| BP | GO:1902369 | 3/80 | 68/18866  | 0.003018 | 0.011033 | 0.005461 | 3 |
| BP | GO:1904377 | 3/80 | 68/18866  | 0.003018 | 0.011033 | 0.005461 | 3 |
| BP | GO:0009743 | 5/80 | 233/18866 | 0.00312  | 0.011375 | 0.005631 | 5 |
| BP | GO:2001234 | 5/80 | 233/18866 | 0.00312  | 0.011375 | 0.005631 | 5 |
| BP | GO:0030879 | 4/80 | 142/18866 | 0.003126 | 0.011375 | 0.005631 | 4 |
| BP | GO:0038094 | 4/80 | 142/18866 | 0.003126 | 0.011375 | 0.005631 | 4 |
| BP | GO:0008286 | 4/80 | 143/18866 | 0.003205 | 0.011542 | 0.005713 | 4 |
| BP | GO:0035296 | 4/80 | 143/18866 | 0.003205 | 0.011542 | 0.005713 | 4 |
| BP | GO:0097746 | 4/80 | 143/18866 | 0.003205 | 0.011542 | 0.005713 | 4 |
| BP | GO:0002544 | 2/80 | 20/18866  | 0.003211 | 0.011542 | 0.005713 | 2 |
| BP | GO:0002726 | 2/80 | 20/18866  | 0.003211 | 0.011542 | 0.005713 | 2 |
| BP | GO:0002902 | 2/80 | 20/18866  | 0.003211 | 0.011542 | 0.005713 | 2 |
| BP | GO:0019373 | 2/80 | 20/18866  | 0.003211 | 0.011542 | 0.005713 | 2 |
| BP | GO:0031998 | 2/80 | 20/18866  | 0.003211 | 0.011542 | 0.005713 | 2 |
| BP | GO:0032303 | 2/80 | 20/18866  | 0.003211 | 0.011542 | 0.005713 | 2 |
| BP | GO:0032727 | 2/80 | 20/18866  | 0.003211 | 0.011542 | 0.005713 | 2 |
| BP | GO:0060965 | 2/80 | 20/18866  | 0.003211 | 0.011542 | 0.005713 | 2 |
| BP | GO:0071695 | 5/80 | 235/18866 | 0.003237 | 0.011621 | 0.005753 | 5 |
| BP | GO:0002218 | 4/80 | 144/18866 | 0.003286 | 0.011748 | 0.005816 | 4 |
| BP | GO:0002700 | 4/80 | 144/18866 | 0.003286 | 0.011748 | 0.005816 | 4 |
| BP | GO:0035150 | 4/80 | 144/18866 | 0.003286 | 0.011748 | 0.005816 | 4 |
| BP | GO:0070585 | 4/80 | 144/18866 | 0.003286 | 0.011748 | 0.005816 | 4 |
| BP | GO:0044242 | 5/80 | 236/18866 | 0.003296 | 0.011769 | 0.005826 | 5 |
| BP | GO:0006650 | 6/80 | 343/18866 | 0.00336  | 0.011983 | 0.005932 | 6 |
| BP | GO:0002431 | 4/80 | 145/18866 | 0.003369 | 0.01199  | 0.005935 | 4 |
| BP | GO:0071322 | 4/80 | 145/18866 | 0.003369 | 0.01199  | 0.005935 | 4 |
| BP | GO:0009201 | 3/80 | 71/18866  | 0.003411 | 0.012099 | 0.005989 | 3 |
| BP | GO:0045739 | 3/80 | 71/18866  | 0.003411 | 0.012099 | 0.005989 | 3 |
| BP | GO:0061180 | 3/80 | 71/18866  | 0.003411 | 0.012099 | 0.005989 | 3 |
| BP | GO:0010594 | 5/80 | 238/18866 | 0.003417 | 0.012107 | 0.005993 | 5 |
| BP | GO:0002683 | 7/80 | 463/18866 | 0.003485 | 0.012284 | 0.006081 | 7 |
| BP | GO:0007265 | 6/80 | 346/18866 | 0.003506 | 0.012284 | 0.006081 | 6 |
| BP | GO:0002693 | 2/80 | 21/18866  | 0.003539 | 0.012284 | 0.006081 | 2 |
| BP | GO:0009110 | 2/80 | 21/18866  | 0.003539 | 0.012284 | 0.006081 | 2 |
| BP | GO:0010310 | 2/80 | 21/18866  | 0.003539 | 0.012284 | 0.006081 | 2 |
| BP | GO:0016540 | 2/80 | 21/18866  | 0.003539 | 0.012284 | 0.006081 | 2 |
| BP | GO:0019370 | 2/80 | 21/18866  | 0.003539 | 0.012284 | 0.006081 | 2 |
| BP | GO:0030878 | 2/80 | 21/18866  | 0.003539 | 0.012284 | 0.006081 | 2 |
| BP | GO:0032516 | 2/80 | 21/18866  | 0.003539 | 0.012284 | 0.006081 | 2 |
| BP | GO:0045943 | 2/80 | 21/18866  | 0.003539 | 0.012284 | 0.006081 | 2 |
| BP | GO:0046514 | 2/80 | 21/18866  | 0.003539 | 0.012284 | 0.006081 | 2 |
| BP | GO:0046519 | 2/80 | 21/18866  | 0.003539 | 0.012284 | 0.006081 | 2 |
| BP | GO:0046641 | 2/80 | 21/18866  | 0.003539 | 0.012284 | 0.006081 | 2 |
| BP | GO:0060716 | 2/80 | 21/18866  | 0.003539 | 0.012284 | 0.006081 | 2 |
| BP | GO:0061042 | 2/80 | 21/18866  | 0.003539 | 0.012284 | 0.006081 | 2 |
| BP | GO:0090312 | 2/80 | 21/18866  | 0.003539 | 0.012284 | 0.006081 | 2 |



|    |            |      |           |          |          |          |   |
|----|------------|------|-----------|----------|----------|----------|---|
| BP | GO:1900543 | 2/80 | 21/18866  | 0.003539 | 0.012284 | 0.006081 | 2 |
| BP | GO:1903978 | 2/80 | 21/18866  | 0.003539 | 0.012284 | 0.006081 | 2 |
| BP | GO:2000269 | 2/80 | 21/18866  | 0.003539 | 0.012284 | 0.006081 | 2 |
| BP | GO:0070988 | 3/80 | 72/18866  | 0.003548 | 0.012303 | 0.00609  | 3 |
| BP | GO:0010675 | 4/80 | 148/18866 | 0.003625 | 0.012541 | 0.006208 | 4 |
| BP | GO:1903670 | 4/80 | 148/18866 | 0.003625 | 0.012541 | 0.006208 | 4 |
| BP | GO:0003012 | 7/80 | 467/18866 | 0.003653 | 0.012625 | 0.00625  | 7 |
| BP | GO:0051966 | 3/80 | 73/18866  | 0.003689 | 0.012736 | 0.006305 | 3 |
| BP | GO:1903364 | 4/80 | 149/18866 | 0.003713 | 0.012805 | 0.006339 | 4 |
| BP | GO:0035264 | 4/80 | 150/18866 | 0.003803 | 0.0131   | 0.006485 | 4 |
| BP | GO:0072521 | 7/80 | 472/18866 | 0.003872 | 0.013304 | 0.006585 | 7 |
| BP | GO:0032928 | 2/80 | 22/18866  | 0.003882 | 0.013304 | 0.006585 | 2 |
| BP | GO:0034312 | 2/80 | 22/18866  | 0.003882 | 0.013304 | 0.006585 | 2 |
| BP | GO:0045980 | 2/80 | 22/18866  | 0.003882 | 0.013304 | 0.006585 | 2 |
| BP | GO:0071459 | 2/80 | 22/18866  | 0.003882 | 0.013304 | 0.006585 | 2 |
| BP | GO:0072330 | 5/80 | 246/18866 | 0.003932 | 0.01346  | 0.006663 | 5 |
| BP | GO:0032602 | 3/80 | 75/18866  | 0.003981 | 0.013584 | 0.006724 | 3 |
| BP | GO:0035019 | 3/80 | 75/18866  | 0.003981 | 0.013584 | 0.006724 | 3 |
| BP | GO:0045685 | 3/80 | 75/18866  | 0.003981 | 0.013584 | 0.006724 | 3 |
| BP | GO:0033044 | 6/80 | 356/18866 | 0.004028 | 0.013731 | 0.006797 | 6 |
| BP | GO:0048285 | 7/80 | 476/18866 | 0.004054 | 0.013805 | 0.006834 | 7 |
| BP | GO:0001678 | 4/80 | 153/18866 | 0.00408  | 0.013879 | 0.00687  | 4 |
| BP | GO:0033077 | 3/80 | 76/18866  | 0.004132 | 0.014026 | 0.006943 | 3 |
| BP | GO:1903524 | 3/80 | 76/18866  | 0.004132 | 0.014026 | 0.006943 | 3 |
| BP | GO:0010288 | 2/80 | 23/18866  | 0.00424  | 0.014243 | 0.007051 | 2 |
| BP | GO:0031281 | 2/80 | 23/18866  | 0.00424  | 0.014243 | 0.007051 | 2 |
| BP | GO:0031639 | 2/80 | 23/18866  | 0.00424  | 0.014243 | 0.007051 | 2 |
| BP | GO:0035162 | 2/80 | 23/18866  | 0.00424  | 0.014243 | 0.007051 | 2 |
| BP | GO:0035743 | 2/80 | 23/18866  | 0.00424  | 0.014243 | 0.007051 | 2 |
| BP | GO:0043586 | 2/80 | 23/18866  | 0.00424  | 0.014243 | 0.007051 | 2 |
| BP | GO:0051043 | 2/80 | 23/18866  | 0.00424  | 0.014243 | 0.007051 | 2 |
| BP | GO:0060149 | 2/80 | 23/18866  | 0.00424  | 0.014243 | 0.007051 | 2 |
| BP | GO:0060967 | 2/80 | 23/18866  | 0.00424  | 0.014243 | 0.007051 | 2 |
| BP | GO:1900017 | 2/80 | 23/18866  | 0.00424  | 0.014243 | 0.007051 | 2 |
| BP | GO:0002833 | 5/80 | 251/18866 | 0.004281 | 0.014354 | 0.007105 | 5 |
| BP | GO:0002200 | 3/80 | 77/18866  | 0.004287 | 0.014354 | 0.007105 | 3 |
| BP | GO:0007422 | 3/80 | 77/18866  | 0.004287 | 0.014354 | 0.007105 | 3 |
| BP | GO:0006936 | 6/80 | 362/18866 | 0.004368 | 0.014612 | 0.007233 | 6 |
| BP | GO:0010498 | 7/80 | 483/18866 | 0.004389 | 0.014666 | 0.00726  | 7 |
| BP | GO:0061045 | 3/80 | 78/18866  | 0.004445 | 0.014837 | 0.007344 | 3 |
| BP | GO:0000086 | 5/80 | 254/18866 | 0.004501 | 0.014994 | 0.007422 | 5 |
| BP | GO:0019318 | 5/80 | 254/18866 | 0.004501 | 0.014994 | 0.007422 | 5 |
| BP | GO:0035051 | 4/80 | 158/18866 | 0.004573 | 0.015211 | 0.00753  | 4 |
| BP | GO:0031016 | 3/80 | 79/18866  | 0.004606 | 0.015211 | 0.00753  | 3 |
| BP | GO:0050672 | 3/80 | 79/18866  | 0.004606 | 0.015211 | 0.00753  | 3 |
| BP | GO:0010869 | 2/80 | 24/18866  | 0.004613 | 0.015211 | 0.00753  | 2 |
| BP | GO:0032753 | 2/80 | 24/18866  | 0.004613 | 0.015211 | 0.00753  | 2 |
| BP | GO:0044346 | 2/80 | 24/18866  | 0.004613 | 0.015211 | 0.00753  | 2 |
| BP | GO:0045821 | 2/80 | 24/18866  | 0.004613 | 0.015211 | 0.00753  | 2 |
| BP | GO:0050995 | 2/80 | 24/18866  | 0.004613 | 0.015211 | 0.00753  | 2 |
| BP | GO:0060396 | 2/80 | 24/18866  | 0.004613 | 0.015211 | 0.00753  | 2 |
| BP | GO:0090335 | 2/80 | 24/18866  | 0.004613 | 0.015211 | 0.00753  | 2 |
| BP | GO:0046394 | 6/80 | 367/18866 | 0.004668 | 0.015371 | 0.007609 | 6 |
| BP | GO:1902600 | 4/80 | 159/18866 | 0.004676 | 0.015371 | 0.007609 | 4 |
| BP | GO:2000058 | 4/80 | 159/18866 | 0.004676 | 0.015371 | 0.007609 | 4 |
| BP | GO:0034765 | 7/80 | 489/18866 | 0.004692 | 0.015407 | 0.007627 | 7 |
| BP | GO:0031334 | 5/80 | 257/18866 | 0.004729 | 0.015498 | 0.007672 | 5 |
| BP | GO:0016053 | 6/80 | 368/18866 | 0.004729 | 0.015498 | 0.007672 | 6 |

|    |            |      |           |          |          |          |   |
|----|------------|------|-----------|----------|----------|----------|---|
| BP | GO:0002312 | 3/80 | 80/18866  | 0.004771 | 0.015557 | 0.007701 | 3 |
| BP | GO:0006110 | 3/80 | 80/18866  | 0.004771 | 0.015557 | 0.007701 | 3 |
| BP | GO:0032204 | 3/80 | 80/18866  | 0.004771 | 0.015557 | 0.007701 | 3 |
| BP | GO:0032945 | 3/80 | 80/18866  | 0.004771 | 0.015557 | 0.007701 | 3 |
| BP | GO:0048678 | 3/80 | 80/18866  | 0.004771 | 0.015557 | 0.007701 | 3 |
| BP | GO:0001937 | 3/80 | 81/18866  | 0.00494  | 0.016057 | 0.007949 | 3 |
| BP | GO:0034644 | 3/80 | 81/18866  | 0.00494  | 0.016057 | 0.007949 | 3 |
| BP | GO:0071158 | 3/80 | 81/18866  | 0.00494  | 0.016057 | 0.007949 | 3 |
| BP | GO:0002092 | 2/80 | 25/18866  | 0.005001 | 0.016126 | 0.007982 | 2 |
| BP | GO:0014829 | 2/80 | 25/18866  | 0.005001 | 0.016126 | 0.007982 | 2 |
| BP | GO:0060259 | 2/80 | 25/18866  | 0.005001 | 0.016126 | 0.007982 | 2 |
| BP | GO:0060330 | 2/80 | 25/18866  | 0.005001 | 0.016126 | 0.007982 | 2 |
| BP | GO:0060334 | 2/80 | 25/18866  | 0.005001 | 0.016126 | 0.007982 | 2 |
| BP | GO:0071378 | 2/80 | 25/18866  | 0.005001 | 0.016126 | 0.007982 | 2 |
| BP | GO:1905564 | 2/80 | 25/18866  | 0.005001 | 0.016126 | 0.007982 | 2 |
| BP | GO:2000679 | 2/80 | 25/18866  | 0.005001 | 0.016126 | 0.007982 | 2 |
| BP | GO:0006665 | 4/80 | 163/18866 | 0.005104 | 0.016418 | 0.008127 | 4 |
| BP | GO:0009142 | 3/80 | 82/18866  | 0.005112 | 0.016418 | 0.008127 | 3 |
| BP | GO:0022617 | 3/80 | 82/18866  | 0.005112 | 0.016418 | 0.008127 | 3 |
| BP | GO:0030193 | 3/80 | 82/18866  | 0.005112 | 0.016418 | 0.008127 | 3 |
| BP | GO:0061448 | 5/80 | 262/18866 | 0.005127 | 0.01645  | 0.008143 | 5 |
| BP | GO:0045637 | 5/80 | 263/18866 | 0.005209 | 0.016684 | 0.008259 | 5 |
| BP | GO:0043535 | 4/80 | 164/18866 | 0.005215 | 0.016684 | 0.008259 | 4 |
| BP | GO:0046165 | 4/80 | 164/18866 | 0.005215 | 0.016684 | 0.008259 | 4 |
| BP | GO:0002718 | 3/80 | 83/18866  | 0.005287 | 0.016865 | 0.008348 | 3 |
| BP | GO:0048145 | 3/80 | 83/18866  | 0.005287 | 0.016865 | 0.008348 | 3 |
| BP | GO:1900046 | 3/80 | 83/18866  | 0.005287 | 0.016865 | 0.008348 | 3 |
| BP | GO:0006959 | 6/80 | 377/18866 | 0.005311 | 0.016924 | 0.008377 | 6 |
| BP | GO:0001783 | 2/80 | 26/18866  | 0.005402 | 0.017064 | 0.008447 | 2 |
| BP | GO:0030810 | 2/80 | 26/18866  | 0.005402 | 0.017064 | 0.008447 | 2 |
| BP | GO:0042730 | 2/80 | 26/18866  | 0.005402 | 0.017064 | 0.008447 | 2 |
| BP | GO:0060390 | 2/80 | 26/18866  | 0.005402 | 0.017064 | 0.008447 | 2 |
| BP | GO:0097066 | 2/80 | 26/18866  | 0.005402 | 0.017064 | 0.008447 | 2 |
| BP | GO:1900373 | 2/80 | 26/18866  | 0.005402 | 0.017064 | 0.008447 | 2 |
| BP | GO:1903649 | 2/80 | 26/18866  | 0.005402 | 0.017064 | 0.008447 | 2 |
| BP | GO:1904353 | 2/80 | 26/18866  | 0.005402 | 0.017064 | 0.008447 | 2 |
| BP | GO:1905523 | 2/80 | 26/18866  | 0.005402 | 0.017064 | 0.008447 | 2 |
| BP | GO:0045913 | 3/80 | 84/18866  | 0.005467 | 0.017233 | 0.00853  | 3 |
| BP | GO:0048144 | 3/80 | 84/18866  | 0.005467 | 0.017233 | 0.00853  | 3 |
| BP | GO:0006970 | 3/80 | 85/18866  | 0.00565  | 0.017774 | 0.008799 | 3 |
| BP | GO:0072527 | 3/80 | 85/18866  | 0.00565  | 0.017774 | 0.008799 | 3 |
| BP | GO:0009651 | 2/80 | 27/18866  | 0.005819 | 0.018218 | 0.009018 | 2 |
| BP | GO:0010971 | 2/80 | 27/18866  | 0.005819 | 0.018218 | 0.009018 | 2 |
| BP | GO:0090140 | 2/80 | 27/18866  | 0.005819 | 0.018218 | 0.009018 | 2 |
| BP | GO:1902175 | 2/80 | 27/18866  | 0.005819 | 0.018218 | 0.009018 | 2 |
| BP | GO:1903203 | 2/80 | 27/18866  | 0.005819 | 0.018218 | 0.009018 | 2 |
| BP | GO:0006919 | 3/80 | 86/18866  | 0.005836 | 0.018219 | 0.009019 | 3 |
| BP | GO:0034109 | 3/80 | 86/18866  | 0.005836 | 0.018219 | 0.009019 | 3 |
| BP | GO:0070664 | 3/80 | 86/18866  | 0.005836 | 0.018219 | 0.009019 | 3 |
| BP | GO:0051781 | 3/80 | 87/18866  | 0.006026 | 0.018795 | 0.009304 | 3 |
| BP | GO:0051302 | 4/80 | 171/18866 | 0.006038 | 0.018795 | 0.009304 | 4 |
| BP | GO:1905952 | 4/80 | 171/18866 | 0.006038 | 0.018795 | 0.009304 | 4 |
| BP | GO:0001906 | 4/80 | 172/18866 | 0.006162 | 0.019163 | 0.009486 | 4 |
| BP | GO:0046889 | 3/80 | 88/18866  | 0.00622  | 0.019193 | 0.009501 | 3 |
| BP | GO:0050818 | 3/80 | 88/18866  | 0.00622  | 0.019193 | 0.009501 | 3 |
| BP | GO:0090559 | 3/80 | 88/18866  | 0.00622  | 0.019193 | 0.009501 | 3 |
| BP | GO:1903312 | 3/80 | 88/18866  | 0.00622  | 0.019193 | 0.009501 | 3 |
| BP | GO:0006972 | 2/80 | 28/18866  | 0.006249 | 0.019193 | 0.009501 | 2 |

|    |            |      |           |          |          |          |   |
|----|------------|------|-----------|----------|----------|----------|---|
| BP | GO:0010818 | 2/80 | 28/18866  | 0.006249 | 0.019193 | 0.009501 | 2 |
| BP | GO:0031645 | 2/80 | 28/18866  | 0.006249 | 0.019193 | 0.009501 | 2 |
| BP | GO:0033561 | 2/80 | 28/18866  | 0.006249 | 0.019193 | 0.009501 | 2 |
| BP | GO:0034311 | 2/80 | 28/18866  | 0.006249 | 0.019193 | 0.009501 | 2 |
| BP | GO:0072376 | 2/80 | 28/18866  | 0.006249 | 0.019193 | 0.009501 | 2 |
| BP | GO:0072378 | 2/80 | 28/18866  | 0.006249 | 0.019193 | 0.009501 | 2 |
| BP | GO:1903579 | 2/80 | 28/18866  | 0.006249 | 0.019193 | 0.009501 | 2 |
| BP | GO:1905563 | 2/80 | 28/18866  | 0.006249 | 0.019193 | 0.009501 | 2 |
| BP | GO:0006633 | 4/80 | 173/18866 | 0.006288 | 0.019294 | 0.009551 | 4 |
| BP | GO:0001659 | 4/80 | 174/18866 | 0.006415 | 0.019648 | 0.009726 | 4 |
| BP | GO:0007033 | 4/80 | 174/18866 | 0.006415 | 0.019648 | 0.009726 | 4 |
| BP | GO:0043470 | 3/80 | 90/18866  | 0.006619 | 0.020233 | 0.010015 | 3 |
| BP | GO:0070542 | 3/80 | 90/18866  | 0.006619 | 0.020233 | 0.010015 | 3 |
| BP | GO:0031063 | 2/80 | 29/18866  | 0.006694 | 0.020384 | 0.01009  | 2 |
| BP | GO:0036336 | 2/80 | 29/18866  | 0.006694 | 0.020384 | 0.01009  | 2 |
| BP | GO:0045822 | 2/80 | 29/18866  | 0.006694 | 0.020384 | 0.01009  | 2 |
| BP | GO:0050901 | 2/80 | 29/18866  | 0.006694 | 0.020384 | 0.01009  | 2 |
| BP | GO:0010959 | 6/80 | 396/18866 | 0.00671  | 0.020414 | 0.010105 | 6 |
| BP | GO:0097306 | 3/80 | 91/18866  | 0.006824 | 0.020742 | 0.010267 | 3 |
| BP | GO:0031341 | 3/80 | 92/18866  | 0.007033 | 0.021356 | 0.010571 | 3 |
| BP | GO:0001822 | 5/80 | 283/18866 | 0.007059 | 0.021415 | 0.010601 | 5 |
| BP | GO:0009150 | 6/80 | 401/18866 | 0.007119 | 0.021517 | 0.010651 | 6 |
| BP | GO:0005979 | 2/80 | 30/18866  | 0.007152 | 0.021517 | 0.010651 | 2 |
| BP | GO:0010758 | 2/80 | 30/18866  | 0.007152 | 0.021517 | 0.010651 | 2 |
| BP | GO:0010962 | 2/80 | 30/18866  | 0.007152 | 0.021517 | 0.010651 | 2 |
| BP | GO:0036475 | 2/80 | 30/18866  | 0.007152 | 0.021517 | 0.010651 | 2 |
| BP | GO:0043372 | 2/80 | 30/18866  | 0.007152 | 0.021517 | 0.010651 | 2 |
| BP | GO:0044030 | 2/80 | 30/18866  | 0.007152 | 0.021517 | 0.010651 | 2 |
| BP | GO:0060055 | 2/80 | 30/18866  | 0.007152 | 0.021517 | 0.010651 | 2 |
| BP | GO:1902751 | 2/80 | 30/18866  | 0.007152 | 0.021517 | 0.010651 | 2 |
| BP | GO:0007411 | 5/80 | 284/18866 | 0.007162 | 0.021525 | 0.010655 | 5 |
| BP | GO:0032088 | 3/80 | 93/18866  | 0.007245 | 0.021736 | 0.010759 | 3 |
| BP | GO:1903035 | 3/80 | 93/18866  | 0.007245 | 0.021736 | 0.010759 | 3 |
| BP | GO:0097485 | 5/80 | 285/18866 | 0.007266 | 0.021778 | 0.01078  | 5 |
| BP | GO:0008361 | 4/80 | 181/18866 | 0.007357 | 0.022029 | 0.010905 | 4 |
| BP | GO:0034308 | 3/80 | 94/18866  | 0.007461 | 0.022301 | 0.011039 | 3 |
| BP | GO:0045778 | 3/80 | 94/18866  | 0.007461 | 0.022301 | 0.011039 | 3 |
| BP | GO:0021700 | 5/80 | 287/18866 | 0.007477 | 0.022329 | 0.011053 | 5 |
| BP | GO:0071346 | 4/80 | 182/18866 | 0.007498 | 0.02237  | 0.011073 | 4 |
| BP | GO:0006356 | 2/80 | 31/18866  | 0.007625 | 0.022642 | 0.011208 | 2 |
| BP | GO:0032770 | 2/80 | 31/18866  | 0.007625 | 0.022642 | 0.011208 | 2 |
| BP | GO:0045737 | 2/80 | 31/18866  | 0.007625 | 0.022642 | 0.011208 | 2 |
| BP | GO:0070229 | 2/80 | 31/18866  | 0.007625 | 0.022642 | 0.011208 | 2 |
| BP | GO:1903792 | 2/80 | 31/18866  | 0.007625 | 0.022642 | 0.011208 | 2 |
| BP | GO:1903725 | 3/80 | 95/18866  | 0.007682 | 0.02279  | 0.011282 | 3 |
| BP | GO:0002695 | 4/80 | 184/18866 | 0.007787 | 0.023081 | 0.011425 | 4 |
| BP | GO:0002690 | 3/80 | 96/18866  | 0.007905 | 0.023369 | 0.011568 | 3 |
| BP | GO:0010972 | 3/80 | 96/18866  | 0.007905 | 0.023369 | 0.011568 | 3 |
| BP | GO:0035249 | 3/80 | 96/18866  | 0.007905 | 0.023369 | 0.011568 | 3 |
| BP | GO:0072001 | 5/80 | 292/18866 | 0.008025 | 0.0237   | 0.011732 | 5 |
| BP | GO:0043488 | 4/80 | 186/18866 | 0.008082 | 0.023738 | 0.01175  | 4 |
| BP | GO:0002724 | 2/80 | 32/18866  | 0.008111 | 0.023738 | 0.01175  | 2 |
| BP | GO:0032673 | 2/80 | 32/18866  | 0.008111 | 0.023738 | 0.01175  | 2 |
| BP | GO:0046320 | 2/80 | 32/18866  | 0.008111 | 0.023738 | 0.01175  | 2 |
| BP | GO:0051968 | 2/80 | 32/18866  | 0.008111 | 0.023738 | 0.01175  | 2 |
| BP | GO:1903959 | 2/80 | 32/18866  | 0.008111 | 0.023738 | 0.01175  | 2 |
| BP | GO:0006476 | 3/80 | 97/18866  | 0.008133 | 0.023738 | 0.01175  | 3 |
| BP | GO:0042100 | 3/80 | 97/18866  | 0.008133 | 0.023738 | 0.01175  | 3 |

|    |            |      |           |          |          |          |   |
|----|------------|------|-----------|----------|----------|----------|---|
| BP | GO:0050764 | 3/80 | 97/18866  | 0.008133 | 0.023738 | 0.01175  | 3 |
| BP | GO:0120162 | 3/80 | 97/18866  | 0.008133 | 0.023738 | 0.01175  | 3 |
| BP | GO:1901184 | 3/80 | 97/18866  | 0.008133 | 0.023738 | 0.01175  | 3 |
| BP | GO:1901216 | 3/80 | 97/18866  | 0.008133 | 0.023738 | 0.01175  | 3 |
| BP | GO:1901655 | 3/80 | 97/18866  | 0.008133 | 0.023738 | 0.01175  | 3 |
| BP | GO:0061138 | 4/80 | 187/18866 | 0.008233 | 0.024007 | 0.011884 | 4 |
| BP | GO:0030316 | 3/80 | 98/18866  | 0.008365 | 0.024352 | 0.012055 | 3 |
| BP | GO:0050768 | 5/80 | 295/18866 | 0.008366 | 0.024352 | 0.012055 | 5 |
| BP | GO:0009259 | 6/80 | 416/18866 | 0.008454 | 0.024564 | 0.012159 | 6 |
| BP | GO:0010639 | 6/80 | 416/18866 | 0.008454 | 0.024564 | 0.012159 | 6 |
| BP | GO:0005996 | 5/80 | 296/18866 | 0.008482 | 0.024602 | 0.012178 | 5 |
| BP | GO:0031647 | 5/80 | 296/18866 | 0.008482 | 0.024602 | 0.012178 | 5 |
| BP | GO:0043534 | 4/80 | 189/18866 | 0.008539 | 0.024744 | 0.012249 | 4 |
| BP | GO:0090277 | 3/80 | 99/18866  | 0.0086   | 0.024816 | 0.012284 | 3 |
| BP | GO:0002691 | 2/80 | 33/18866  | 0.00861  | 0.024816 | 0.012284 | 2 |
| BP | GO:0030149 | 2/80 | 33/18866  | 0.00861  | 0.024816 | 0.012284 | 2 |
| BP | GO:0042755 | 2/80 | 33/18866  | 0.00861  | 0.024816 | 0.012284 | 2 |
| BP | GO:0046640 | 2/80 | 33/18866  | 0.00861  | 0.024816 | 0.012284 | 2 |
| BP | GO:1905048 | 2/80 | 33/18866  | 0.00861  | 0.024816 | 0.012284 | 2 |
| BP | GO:0003018 | 4/80 | 190/18866 | 0.008695 | 0.025039 | 0.012395 | 4 |
| BP | GO:0006672 | 3/80 | 100/18866 | 0.008839 | 0.025408 | 0.012577 | 3 |
| BP | GO:0045807 | 3/80 | 100/18866 | 0.008839 | 0.025408 | 0.012577 | 3 |
| BP | GO:0007162 | 5/80 | 301/18866 | 0.00908  | 0.02604  | 0.01289  | 5 |
| BP | GO:0015908 | 3/80 | 101/18866 | 0.009083 | 0.02604  | 0.01289  | 3 |
| BP | GO:0007202 | 2/80 | 34/18866  | 0.009124 | 0.02604  | 0.01289  | 2 |
| BP | GO:0032148 | 2/80 | 34/18866  | 0.009124 | 0.02604  | 0.01289  | 2 |
| BP | GO:0032212 | 2/80 | 34/18866  | 0.009124 | 0.02604  | 0.01289  | 2 |
| BP | GO:0033198 | 2/80 | 34/18866  | 0.009124 | 0.02604  | 0.01289  | 2 |
| BP | GO:0043094 | 2/80 | 34/18866  | 0.009124 | 0.02604  | 0.01289  | 2 |
| BP | GO:0055094 | 2/80 | 34/18866  | 0.009124 | 0.02604  | 0.01289  | 2 |
| BP | GO:0061136 | 4/80 | 193/18866 | 0.009175 | 0.026163 | 0.012951 | 4 |
| BP | GO:1903522 | 5/80 | 303/18866 | 0.009326 | 0.026534 | 0.013135 | 5 |
| BP | GO:0000079 | 3/80 | 102/18866 | 0.00933  | 0.026534 | 0.013135 | 3 |
| BP | GO:1903076 | 3/80 | 102/18866 | 0.00933  | 0.026534 | 0.013135 | 3 |
| BP | GO:0046578 | 4/80 | 194/18866 | 0.009338 | 0.026535 | 0.013135 | 4 |
| BP | GO:0007219 | 4/80 | 195/18866 | 0.009504 | 0.026934 | 0.013333 | 4 |
| BP | GO:0043487 | 4/80 | 195/18866 | 0.009504 | 0.026934 | 0.013333 | 4 |
| BP | GO:0050864 | 4/80 | 195/18866 | 0.009504 | 0.026934 | 0.013333 | 4 |
| BP | GO:0019693 | 6/80 | 427/18866 | 0.009542 | 0.026994 | 0.013362 | 6 |
| BP | GO:0002042 | 3/80 | 103/18866 | 0.009581 | 0.026994 | 0.013362 | 3 |
| BP | GO:0034766 | 3/80 | 103/18866 | 0.009581 | 0.026994 | 0.013362 | 3 |
| BP | GO:0060079 | 3/80 | 103/18866 | 0.009581 | 0.026994 | 0.013362 | 3 |
| BP | GO:1901570 | 3/80 | 103/18866 | 0.009581 | 0.026994 | 0.013362 | 3 |
| BP | GO:0006471 | 2/80 | 35/18866  | 0.00965  | 0.026994 | 0.013362 | 2 |
| BP | GO:0006691 | 2/80 | 35/18866  | 0.00965  | 0.026994 | 0.013362 | 2 |
| BP | GO:0007435 | 2/80 | 35/18866  | 0.00965  | 0.026994 | 0.013362 | 2 |
| BP | GO:0009262 | 2/80 | 35/18866  | 0.00965  | 0.026994 | 0.013362 | 2 |
| BP | GO:0032633 | 2/80 | 35/18866  | 0.00965  | 0.026994 | 0.013362 | 2 |
| BP | GO:0060251 | 2/80 | 35/18866  | 0.00965  | 0.026994 | 0.013362 | 2 |
| BP | GO:0060674 | 2/80 | 35/18866  | 0.00965  | 0.026994 | 0.013362 | 2 |
| BP | GO:0071312 | 2/80 | 35/18866  | 0.00965  | 0.026994 | 0.013362 | 2 |
| BP | GO:0097009 | 2/80 | 35/18866  | 0.00965  | 0.026994 | 0.013362 | 2 |
| BP | GO:1904031 | 2/80 | 35/18866  | 0.00965  | 0.026994 | 0.013362 | 2 |
| BP | GO:0009116 | 3/80 | 104/18866 | 0.009836 | 0.027431 | 0.013578 | 3 |
| BP | GO:0120034 | 3/80 | 104/18866 | 0.009836 | 0.027431 | 0.013578 | 3 |
| BP | GO:0006164 | 4/80 | 197/18866 | 0.00984  | 0.027431 | 0.013578 | 4 |
| BP | GO:0009749 | 4/80 | 197/18866 | 0.00984  | 0.027431 | 0.013578 | 4 |
| BP | GO:0048259 | 3/80 | 105/18866 | 0.010094 | 0.028042 | 0.013881 | 3 |

|    |            |      |           |          |          |          |   |
|----|------------|------|-----------|----------|----------|----------|---|
| BP | GO:0062014 | 3/80 | 105/18866 | 0.010094 | 0.028042 | 0.013881 | 3 |
| BP | GO:2001022 | 3/80 | 105/18866 | 0.010094 | 0.028042 | 0.013881 | 3 |
| BP | GO:0001893 | 2/80 | 36/18866  | 0.01019  | 0.028042 | 0.013881 | 2 |
| BP | GO:0002701 | 2/80 | 36/18866  | 0.01019  | 0.028042 | 0.013881 | 2 |
| BP | GO:0031572 | 2/80 | 36/18866  | 0.01019  | 0.028042 | 0.013881 | 2 |
| BP | GO:0034405 | 2/80 | 36/18866  | 0.01019  | 0.028042 | 0.013881 | 2 |
| BP | GO:0042554 | 2/80 | 36/18866  | 0.01019  | 0.028042 | 0.013881 | 2 |
| BP | GO:0046633 | 2/80 | 36/18866  | 0.01019  | 0.028042 | 0.013881 | 2 |
| BP | GO:0051973 | 2/80 | 36/18866  | 0.01019  | 0.028042 | 0.013881 | 2 |
| BP | GO:0070873 | 2/80 | 36/18866  | 0.01019  | 0.028042 | 0.013881 | 2 |
| BP | GO:0071402 | 2/80 | 36/18866  | 0.01019  | 0.028042 | 0.013881 | 2 |
| BP | GO:2000310 | 2/80 | 36/18866  | 0.01019  | 0.028042 | 0.013881 | 2 |
| BP | GO:2000516 | 2/80 | 36/18866  | 0.01019  | 0.028042 | 0.013881 | 2 |
| BP | GO:2000781 | 2/80 | 36/18866  | 0.01019  | 0.028042 | 0.013881 | 2 |
| BP | GO:0019395 | 3/80 | 106/18866 | 0.010357 | 0.028453 | 0.014085 | 3 |
| BP | GO:1904029 | 3/80 | 106/18866 | 0.010357 | 0.028453 | 0.014085 | 3 |
| BP | GO:0030148 | 3/80 | 107/18866 | 0.010624 | 0.029112 | 0.014411 | 3 |
| BP | GO:0030330 | 3/80 | 107/18866 | 0.010624 | 0.029112 | 0.014411 | 3 |
| BP | GO:0035601 | 3/80 | 107/18866 | 0.010624 | 0.029112 | 0.014411 | 3 |
| BP | GO:0009746 | 4/80 | 202/18866 | 0.010716 | 0.02919  | 0.014449 | 4 |
| BP | GO:0034341 | 4/80 | 202/18866 | 0.010716 | 0.02919  | 0.014449 | 4 |
| BP | GO:0032717 | 2/80 | 37/18866  | 0.010743 | 0.02919  | 0.014449 | 2 |
| BP | GO:0045730 | 2/80 | 37/18866  | 0.010743 | 0.02919  | 0.014449 | 2 |
| BP | GO:0060969 | 2/80 | 37/18866  | 0.010743 | 0.02919  | 0.014449 | 2 |
| BP | GO:0090050 | 2/80 | 37/18866  | 0.010743 | 0.02919  | 0.014449 | 2 |
| BP | GO:0090322 | 2/80 | 37/18866  | 0.010743 | 0.02919  | 0.014449 | 2 |
| BP | GO:0098926 | 2/80 | 37/18866  | 0.010743 | 0.02919  | 0.014449 | 2 |
| BP | GO:1904358 | 2/80 | 37/18866  | 0.010743 | 0.02919  | 0.014449 | 2 |
| BP | GO:2000273 | 2/80 | 37/18866  | 0.010743 | 0.02919  | 0.014449 | 2 |
| BP | GO:0032508 | 3/80 | 108/18866 | 0.010894 | 0.029577 | 0.014641 | 3 |
| BP | GO:0006939 | 3/80 | 109/18866 | 0.011169 | 0.030298 | 0.014998 | 3 |
| BP | GO:0048608 | 6/80 | 443/18866 | 0.011299 | 0.030446 | 0.015071 | 6 |
| BP | GO:0006862 | 2/80 | 38/18866  | 0.011309 | 0.030446 | 0.015071 | 2 |
| BP | GO:0032094 | 2/80 | 38/18866  | 0.011309 | 0.030446 | 0.015071 | 2 |
| BP | GO:0032885 | 2/80 | 38/18866  | 0.011309 | 0.030446 | 0.015071 | 2 |
| BP | GO:0043029 | 2/80 | 38/18866  | 0.011309 | 0.030446 | 0.015071 | 2 |
| BP | GO:0046466 | 2/80 | 38/18866  | 0.011309 | 0.030446 | 0.015071 | 2 |
| BP | GO:0051930 | 2/80 | 38/18866  | 0.011309 | 0.030446 | 0.015071 | 2 |
| BP | GO:0071392 | 2/80 | 38/18866  | 0.011309 | 0.030446 | 0.015071 | 2 |
| BP | GO:1903523 | 2/80 | 38/18866  | 0.011309 | 0.030446 | 0.015071 | 2 |
| BP | GO:0006664 | 3/80 | 110/18866 | 0.011448 | 0.030751 | 0.015222 | 3 |
| BP | GO:1904659 | 3/80 | 110/18866 | 0.011448 | 0.030751 | 0.015222 | 3 |
| BP | GO:0071383 | 4/80 | 206/18866 | 0.011451 | 0.030751 | 0.015222 | 4 |
| BP | GO:0051961 | 5/80 | 319/18866 | 0.01147  | 0.030777 | 0.015235 | 5 |
| BP | GO:0050866 | 4/80 | 207/18866 | 0.01164  | 0.031207 | 0.015448 | 4 |
| BP | GO:0051149 | 3/80 | 111/18866 | 0.01173  | 0.031372 | 0.015529 | 3 |
| BP | GO:0098732 | 3/80 | 111/18866 | 0.01173  | 0.031372 | 0.015529 | 3 |
| BP | GO:1903509 | 3/80 | 111/18866 | 0.01173  | 0.031372 | 0.015529 | 3 |
| BP | GO:0061458 | 6/80 | 447/18866 | 0.011771 | 0.031455 | 0.015571 | 6 |
| BP | GO:0061013 | 4/80 | 208/18866 | 0.01183  | 0.031531 | 0.015608 | 4 |
| BP | GO:0072522 | 4/80 | 208/18866 | 0.01183  | 0.031531 | 0.015608 | 4 |
| BP | GO:0007431 | 2/80 | 39/18866  | 0.011887 | 0.031531 | 0.015608 | 2 |
| BP | GO:0010831 | 2/80 | 39/18866  | 0.011887 | 0.031531 | 0.015608 | 2 |
| BP | GO:0014037 | 2/80 | 39/18866  | 0.011887 | 0.031531 | 0.015608 | 2 |
| BP | GO:0032660 | 2/80 | 39/18866  | 0.011887 | 0.031531 | 0.015608 | 2 |
| BP | GO:0046326 | 2/80 | 39/18866  | 0.011887 | 0.031531 | 0.015608 | 2 |
| BP | GO:0051931 | 2/80 | 39/18866  | 0.011887 | 0.031531 | 0.015608 | 2 |
| BP | GO:1901068 | 2/80 | 39/18866  | 0.011887 | 0.031531 | 0.015608 | 2 |

|    |            |      |           |          |          |          |   |
|----|------------|------|-----------|----------|----------|----------|---|
| BP | GO:0007204 | 5/80 | 322/18866 | 0.011906 | 0.031555 | 0.01562  | 5 |
| BP | GO:0099565 | 3/80 | 112/18866 | 0.012017 | 0.031812 | 0.015747 | 3 |
| BP | GO:0035303 | 4/80 | 209/18866 | 0.012023 | 0.031812 | 0.015747 | 4 |
| BP | GO:0051235 | 5/80 | 324/18866 | 0.012203 | 0.032248 | 0.015963 | 5 |
| BP | GO:0002377 | 4/80 | 210/18866 | 0.012218 | 0.032248 | 0.015963 | 4 |
| BP | GO:0030100 | 4/80 | 210/18866 | 0.012218 | 0.032248 | 0.015963 | 4 |
| BP | GO:1903555 | 3/80 | 113/18866 | 0.012308 | 0.032459 | 0.016067 | 3 |
| BP | GO:0031396 | 4/80 | 211/18866 | 0.012415 | 0.032714 | 0.016194 | 4 |
| BP | GO:0010613 | 2/80 | 40/18866  | 0.012479 | 0.03275  | 0.016212 | 2 |
| BP | GO:0010939 | 2/80 | 40/18866  | 0.012479 | 0.03275  | 0.016212 | 2 |
| BP | GO:0030501 | 2/80 | 40/18866  | 0.012479 | 0.03275  | 0.016212 | 2 |
| BP | GO:0045746 | 2/80 | 40/18866  | 0.012479 | 0.03275  | 0.016212 | 2 |
| BP | GO:1902895 | 2/80 | 40/18866  | 0.012479 | 0.03275  | 0.016212 | 2 |
| BP | GO:0008645 | 3/80 | 114/18866 | 0.012602 | 0.03302  | 0.016345 | 3 |
| BP | GO:0016101 | 3/80 | 114/18866 | 0.012602 | 0.03302  | 0.016345 | 3 |
| BP | GO:0006643 | 4/80 | 212/18866 | 0.012614 | 0.033022 | 0.016346 | 4 |
| BP | GO:0006898 | 5/80 | 328/18866 | 0.012813 | 0.033467 | 0.016566 | 5 |
| BP | GO:0007254 | 4/80 | 213/18866 | 0.012814 | 0.033467 | 0.016566 | 4 |
| BP | GO:0045089 | 4/80 | 213/18866 | 0.012814 | 0.033467 | 0.016566 | 4 |
| BP | GO:0006874 | 6/80 | 456/18866 | 0.012886 | 0.033612 | 0.016638 | 6 |
| BP | GO:0006096 | 3/80 | 115/18866 | 0.012901 | 0.033612 | 0.016638 | 3 |
| BP | GO:0031623 | 3/80 | 115/18866 | 0.012901 | 0.033612 | 0.016638 | 3 |
| BP | GO:0014742 | 2/80 | 41/18866  | 0.013083 | 0.033976 | 0.016819 | 2 |
| BP | GO:0051354 | 2/80 | 41/18866  | 0.013083 | 0.033976 | 0.016819 | 2 |
| BP | GO:0070317 | 2/80 | 41/18866  | 0.013083 | 0.033976 | 0.016819 | 2 |
| BP | GO:0072528 | 2/80 | 41/18866  | 0.013083 | 0.033976 | 0.016819 | 2 |
| BP | GO:0001655 | 5/80 | 330/18866 | 0.013125 | 0.034058 | 0.016859 | 5 |
| BP | GO:0006757 | 3/80 | 116/18866 | 0.013204 | 0.034152 | 0.016906 | 3 |
| BP | GO:0015749 | 3/80 | 116/18866 | 0.013204 | 0.034152 | 0.016906 | 3 |
| BP | GO:0032392 | 3/80 | 116/18866 | 0.013204 | 0.034152 | 0.016906 | 3 |
| BP | GO:0060964 | 3/80 | 116/18866 | 0.013204 | 0.034152 | 0.016906 | 3 |
| BP | GO:0070374 | 4/80 | 215/18866 | 0.013222 | 0.034173 | 0.016916 | 4 |
| BP | GO:0000266 | 2/80 | 42/18866  | 0.0137   | 0.035294 | 0.017471 | 2 |
| BP | GO:0098760 | 2/80 | 42/18866  | 0.0137   | 0.035294 | 0.017471 | 2 |
| BP | GO:0098761 | 2/80 | 42/18866  | 0.0137   | 0.035294 | 0.017471 | 2 |
| BP | GO:1901658 | 2/80 | 42/18866  | 0.0137   | 0.035294 | 0.017471 | 2 |
| BP | GO:0034219 | 3/80 | 118/18866 | 0.013821 | 0.03555  | 0.017598 | 3 |
| BP | GO:0050868 | 3/80 | 118/18866 | 0.013821 | 0.03555  | 0.017598 | 3 |
| BP | GO:0010822 | 3/80 | 119/18866 | 0.014136 | 0.036303 | 0.01797  | 3 |
| BP | GO:0071706 | 3/80 | 119/18866 | 0.014136 | 0.036303 | 0.01797  | 3 |
| BP | GO:0002369 | 2/80 | 43/18866  | 0.014329 | 0.036681 | 0.018157 | 2 |
| BP | GO:0010470 | 2/80 | 43/18866  | 0.014329 | 0.036681 | 0.018157 | 2 |
| BP | GO:0050850 | 2/80 | 43/18866  | 0.014329 | 0.036681 | 0.018157 | 2 |
| BP | GO:0150077 | 2/80 | 43/18866  | 0.014329 | 0.036681 | 0.018157 | 2 |
| BP | GO:0060147 | 3/80 | 120/18866 | 0.014455 | 0.036945 | 0.018288 | 3 |
| BP | GO:0060966 | 3/80 | 120/18866 | 0.014455 | 0.036945 | 0.018288 | 3 |
| BP | GO:0055074 | 6/80 | 468/18866 | 0.014485 | 0.036992 | 0.018312 | 6 |
| BP | GO:0010906 | 3/80 | 121/18866 | 0.014778 | 0.037711 | 0.018667 | 3 |
| BP | GO:0017145 | 2/80 | 44/18866  | 0.014971 | 0.038051 | 0.018836 | 2 |
| BP | GO:0032620 | 2/80 | 44/18866  | 0.014971 | 0.038051 | 0.018836 | 2 |
| BP | GO:0032881 | 2/80 | 44/18866  | 0.014971 | 0.038051 | 0.018836 | 2 |
| BP | GO:0033003 | 2/80 | 44/18866  | 0.014971 | 0.038051 | 0.018836 | 2 |
| BP | GO:1905521 | 2/80 | 44/18866  | 0.014971 | 0.038051 | 0.018836 | 2 |
| BP | GO:0010721 | 5/80 | 343/18866 | 0.015282 | 0.038811 | 0.019212 | 5 |
| BP | GO:1903050 | 4/80 | 225/18866 | 0.015386 | 0.039045 | 0.019328 | 4 |
| BP | GO:1904375 | 3/80 | 123/18866 | 0.015437 | 0.039144 | 0.019377 | 3 |
| BP | GO:0010828 | 2/80 | 45/18866  | 0.015624 | 0.039433 | 0.01952  | 2 |
| BP | GO:0031018 | 2/80 | 45/18866  | 0.015624 | 0.039433 | 0.01952  | 2 |

|    |            |      |           |          |          |          |   |
|----|------------|------|-----------|----------|----------|----------|---|
| BP | GO:0032722 | 2/80 | 45/18866  | 0.015624 | 0.039433 | 0.01952  | 2 |
| BP | GO:0034105 | 2/80 | 45/18866  | 0.015624 | 0.039433 | 0.01952  | 2 |
| BP | GO:0035094 | 2/80 | 45/18866  | 0.015624 | 0.039433 | 0.01952  | 2 |
| BP | GO:0070316 | 2/80 | 45/18866  | 0.015624 | 0.039433 | 0.01952  | 2 |
| BP | GO:0022612 | 3/80 | 124/18866 | 0.015772 | 0.039744 | 0.019674 | 3 |
| BP | GO:0046031 | 3/80 | 124/18866 | 0.015772 | 0.039744 | 0.019674 | 3 |
| BP | GO:0034605 | 3/80 | 125/18866 | 0.016111 | 0.040568 | 0.020081 | 3 |
| BP | GO:0005978 | 2/80 | 46/18866  | 0.01629  | 0.040826 | 0.02021  | 2 |
| BP | GO:0009250 | 2/80 | 46/18866  | 0.01629  | 0.040826 | 0.02021  | 2 |
| BP | GO:0032309 | 2/80 | 46/18866  | 0.01629  | 0.040826 | 0.02021  | 2 |
| BP | GO:0032692 | 2/80 | 46/18866  | 0.01629  | 0.040826 | 0.02021  | 2 |
| BP | GO:0045023 | 2/80 | 46/18866  | 0.01629  | 0.040826 | 0.02021  | 2 |
| BP | GO:0051646 | 2/80 | 46/18866  | 0.01629  | 0.040826 | 0.02021  | 2 |
| BP | GO:0048762 | 4/80 | 229/18866 | 0.01631  | 0.040845 | 0.020219 | 4 |
| BP | GO:0009615 | 5/80 | 349/18866 | 0.016352 | 0.040919 | 0.020255 | 5 |
| BP | GO:0001649 | 4/80 | 231/18866 | 0.016785 | 0.04197  | 0.020775 | 4 |
| BP | GO:0008542 | 2/80 | 47/18866  | 0.016968 | 0.042263 | 0.02092  | 2 |
| BP | GO:0030225 | 2/80 | 47/18866  | 0.016968 | 0.042263 | 0.02092  | 2 |
| BP | GO:0032480 | 2/80 | 47/18866  | 0.016968 | 0.042263 | 0.02092  | 2 |
| BP | GO:0042551 | 2/80 | 47/18866  | 0.016968 | 0.042263 | 0.02092  | 2 |
| BP | GO:0042572 | 2/80 | 47/18866  | 0.016968 | 0.042263 | 0.02092  | 2 |
| BP | GO:0050769 | 6/80 | 485/18866 | 0.016982 | 0.042264 | 0.020921 | 6 |
| BP | GO:0014013 | 3/80 | 128/18866 | 0.017154 | 0.042628 | 0.021101 | 3 |
| BP | GO:0034763 | 3/80 | 128/18866 | 0.017154 | 0.042628 | 0.021101 | 3 |
| BP | GO:0071482 | 3/80 | 129/18866 | 0.01751  | 0.043479 | 0.021523 | 3 |
| BP | GO:0009409 | 2/80 | 48/18866  | 0.017657 | 0.043543 | 0.021554 | 2 |
| BP | GO:0033628 | 2/80 | 48/18866  | 0.017657 | 0.043543 | 0.021554 | 2 |
| BP | GO:0043370 | 2/80 | 48/18866  | 0.017657 | 0.043543 | 0.021554 | 2 |
| BP | GO:0051972 | 2/80 | 48/18866  | 0.017657 | 0.043543 | 0.021554 | 2 |
| BP | GO:0060324 | 2/80 | 48/18866  | 0.017657 | 0.043543 | 0.021554 | 2 |
| BP | GO:0070169 | 2/80 | 48/18866  | 0.017657 | 0.043543 | 0.021554 | 2 |
| BP | GO:0110151 | 2/80 | 48/18866  | 0.017657 | 0.043543 | 0.021554 | 2 |
| BP | GO:1904036 | 2/80 | 48/18866  | 0.017657 | 0.043543 | 0.021554 | 2 |
| BP | GO:2001239 | 2/80 | 48/18866  | 0.017657 | 0.043543 | 0.021554 | 2 |
| BP | GO:0001505 | 4/80 | 235/18866 | 0.017761 | 0.043752 | 0.021658 | 4 |
| BP | GO:0016049 | 6/80 | 490/18866 | 0.017769 | 0.043752 | 0.021658 | 6 |
| BP | GO:0051480 | 5/80 | 357/18866 | 0.017857 | 0.043935 | 0.021748 | 5 |
| BP | GO:0072503 | 6/80 | 492/18866 | 0.018091 | 0.044477 | 0.022017 | 6 |
| BP | GO:0006766 | 3/80 | 131/18866 | 0.018234 | 0.044794 | 0.022174 | 3 |
| BP | GO:0032872 | 4/80 | 237/18866 | 0.018262 | 0.044829 | 0.022191 | 4 |
| BP | GO:0002686 | 2/80 | 49/18866  | 0.018359 | 0.044896 | 0.022224 | 2 |
| BP | GO:0031279 | 2/80 | 49/18866  | 0.018359 | 0.044896 | 0.022224 | 2 |
| BP | GO:0070231 | 2/80 | 49/18866  | 0.018359 | 0.044896 | 0.022224 | 2 |
| BP | GO:1900087 | 2/80 | 49/18866  | 0.018359 | 0.044896 | 0.022224 | 2 |
| BP | GO:2000107 | 2/80 | 49/18866  | 0.018359 | 0.044896 | 0.022224 | 2 |
| BP | GO:0019751 | 3/80 | 132/18866 | 0.018602 | 0.045457 | 0.022502 | 3 |
| BP | GO:0006165 | 3/80 | 133/18866 | 0.018975 | 0.046184 | 0.022862 | 3 |
| BP | GO:0032886 | 4/80 | 240/18866 | 0.01903  | 0.046184 | 0.022862 | 4 |
| BP | GO:0070302 | 4/80 | 240/18866 | 0.01903  | 0.046184 | 0.022862 | 4 |
| BP | GO:0001961 | 2/80 | 50/18866  | 0.019072 | 0.046184 | 0.022862 | 2 |
| BP | GO:0007528 | 2/80 | 50/18866  | 0.019072 | 0.046184 | 0.022862 | 2 |
| BP | GO:0010718 | 2/80 | 50/18866  | 0.019072 | 0.046184 | 0.022862 | 2 |
| BP | GO:0014009 | 2/80 | 50/18866  | 0.019072 | 0.046184 | 0.022862 | 2 |
| BP | GO:0030195 | 2/80 | 50/18866  | 0.019072 | 0.046184 | 0.022862 | 2 |
| BP | GO:0050873 | 2/80 | 50/18866  | 0.019072 | 0.046184 | 0.022862 | 2 |
| BP | GO:0071715 | 2/80 | 50/18866  | 0.019072 | 0.046184 | 0.022862 | 2 |
| BP | GO:1901571 | 2/80 | 50/18866  | 0.019072 | 0.046184 | 0.022862 | 2 |
| BP | GO:1904707 | 2/80 | 50/18866  | 0.019072 | 0.046184 | 0.022862 | 2 |

|    |            |       |           |          |          |          |    |
|----|------------|-------|-----------|----------|----------|----------|----|
| BP | GO:0034754 | 3/80  | 134/18866 | 0.019351 | 0.046756 | 0.023144 | 3  |
| BP | GO:0045995 | 3/80  | 134/18866 | 0.019351 | 0.046756 | 0.023144 | 3  |
| BP | GO:0046683 | 3/80  | 134/18866 | 0.019351 | 0.046756 | 0.023144 | 3  |
| BP | GO:1903320 | 4/80  | 242/18866 | 0.019553 | 0.047208 | 0.023368 | 4  |
| BP | GO:0002449 | 5/80  | 366/18866 | 0.019656 | 0.04737  | 0.023449 | 5  |
| BP | GO:0032368 | 3/80  | 135/18866 | 0.019732 | 0.04737  | 0.023449 | 3  |
| BP | GO:0046939 | 3/80  | 135/18866 | 0.019732 | 0.04737  | 0.023449 | 3  |
| BP | GO:0002204 | 2/80  | 51/18866  | 0.019796 | 0.04737  | 0.023449 | 2  |
| BP | GO:0002208 | 2/80  | 51/18866  | 0.019796 | 0.04737  | 0.023449 | 2  |
| BP | GO:0032206 | 2/80  | 51/18866  | 0.019796 | 0.04737  | 0.023449 | 2  |
| BP | GO:0035272 | 2/80  | 51/18866  | 0.019796 | 0.04737  | 0.023449 | 2  |
| BP | GO:0045190 | 2/80  | 51/18866  | 0.019796 | 0.04737  | 0.023449 | 2  |
| BP | GO:0071675 | 2/80  | 51/18866  | 0.019796 | 0.04737  | 0.023449 | 2  |
| BP | GO:1900047 | 2/80  | 51/18866  | 0.019796 | 0.04737  | 0.023449 | 2  |
| BP | GO:1902893 | 2/80  | 51/18866  | 0.019796 | 0.04737  | 0.023449 | 2  |
| BP | GO:1903573 | 2/80  | 51/18866  | 0.019796 | 0.04737  | 0.023449 | 2  |
| BP | GO:0009135 | 3/80  | 136/18866 | 0.020116 | 0.048065 | 0.023793 | 3  |
| BP | GO:0009179 | 3/80  | 136/18866 | 0.020116 | 0.048065 | 0.023793 | 3  |
| BP | GO:0045861 | 5/80  | 369/18866 | 0.020282 | 0.048424 | 0.023971 | 5  |
| BP | GO:0045839 | 2/80  | 52/18866  | 0.020532 | 0.048806 | 0.024159 | 2  |
| BP | GO:0048260 | 2/80  | 52/18866  | 0.020532 | 0.048806 | 0.024159 | 2  |
| BP | GO:0071622 | 2/80  | 52/18866  | 0.020532 | 0.048806 | 0.024159 | 2  |
| BP | GO:0090329 | 2/80  | 52/18866  | 0.020532 | 0.048806 | 0.024159 | 2  |
| BP | GO:1903557 | 2/80  | 52/18866  | 0.020532 | 0.048806 | 0.024159 | 2  |
| BP | GO:2000677 | 2/80  | 52/18866  | 0.020532 | 0.048806 | 0.024159 | 2  |
| BP | GO:0000724 | 3/80  | 138/18866 | 0.020898 | 0.049639 | 0.024572 | 3  |
| CC | GO:0005942 | 5/80  | 29/19559  | 1.11E-07 | 2.45E-05 | 1.49E-05 | 5  |
| CC | GO:0019898 | 10/80 | 306/19559 | 4.75E-07 | 5.25E-05 | 3.20E-05 | 10 |
| CC | GO:0061695 | 9/80  | 253/19559 | 9.17E-07 | 6.75E-05 | 4.12E-05 | 9  |
| CC | GO:0031983 | 9/80  | 328/19559 | 7.66E-06 | 0.000423 | 0.000258 | 9  |
| CC | GO:0070069 | 4/80  | 34/19559  | 1.10E-05 | 0.000484 | 0.000295 | 4  |
| CC | GO:0005743 | 10/80 | 489/19559 | 2.99E-05 | 0.001102 | 0.000672 | 10 |
| CC | GO:0034774 | 8/80  | 322/19559 | 5.12E-05 | 0.001121 | 0.000683 | 8  |
| CC | GO:0060205 | 8/80  | 326/19559 | 5.59E-05 | 0.001121 | 0.000683 | 8  |
| CC | GO:0000781 | 6/80  | 164/19559 | 5.71E-05 | 0.001121 | 0.000683 | 6  |
| CC | GO:0070469 | 5/80  | 101/19559 | 5.88E-05 | 0.001121 | 0.000683 | 5  |
| CC | GO:0045121 | 8/80  | 329/19559 | 5.96E-05 | 0.001121 | 0.000683 | 8  |
| CC | GO:0098857 | 8/80  | 330/19559 | 6.09E-05 | 0.001121 | 0.000683 | 8  |
| CC | GO:0045277 | 3/80  | 20/19559  | 7.14E-05 | 0.001214 | 0.00074  | 3  |
| CC | GO:0098589 | 8/80  | 343/19559 | 7.97E-05 | 0.001258 | 0.000767 | 8  |
| CC | GO:0098687 | 8/80  | 350/19559 | 9.17E-05 | 0.001325 | 0.000808 | 8  |
| CC | GO:0042629 | 3/80  | 22/19559  | 9.59E-05 | 0.001325 | 0.000808 | 3  |
| CC | GO:0101002 | 5/80  | 124/19559 | 0.000155 | 0.001907 | 0.001162 | 5  |
| CC | GO:1904813 | 5/80  | 124/19559 | 0.000155 | 0.001907 | 0.001162 | 5  |
| CC | GO:0005901 | 4/80  | 82/19559  | 0.000356 | 0.004144 | 0.002526 | 4  |
| CC | GO:0098803 | 4/80  | 85/19559  | 0.000409 | 0.004515 | 0.002753 | 4  |
| CC | GO:0005775 | 5/80  | 173/19559 | 0.000719 | 0.00726  | 0.004426 | 5  |
| CC | GO:0000307 | 3/80  | 43/19559  | 0.000723 | 0.00726  | 0.004426 | 3  |
| CC | GO:0000794 | 4/80  | 103/19559 | 0.000844 | 0.008109 | 0.004944 | 4  |
| CC | GO:0098562 | 5/80  | 188/19559 | 0.001044 | 0.009614 | 0.005861 | 5  |
| CC | GO:0009925 | 3/80  | 51/19559  | 0.001191 | 0.010129 | 0.006176 | 3  |
| CC | GO:0044853 | 4/80  | 113/19559 | 0.001192 | 0.010129 | 0.006176 | 4  |
| CC | GO:0005750 | 2/80  | 14/19559  | 0.001456 | 0.011494 | 0.007007 | 2  |
| CC | GO:0045275 | 2/80  | 14/19559  | 0.001456 | 0.011494 | 0.007007 | 2  |
| CC | GO:0031616 | 2/80  | 15/19559  | 0.001676 | 0.012365 | 0.007538 | 2  |
| CC | GO:0000784 | 4/80  | 124/19559 | 0.001678 | 0.012365 | 0.007538 | 4  |
| CC | GO:0061702 | 2/80  | 17/19559  | 0.002159 | 0.014535 | 0.008861 | 2  |
| CC | GO:0072686 | 4/80  | 133/19559 | 0.002168 | 0.014535 | 0.008861 | 4  |



|    |            |       |           |          |          |          |    |
|----|------------|-------|-----------|----------|----------|----------|----|
| CC | GO:0000793 | 5/80  | 222/19559 | 0.00217  | 0.014535 | 0.008861 | 5  |
| CC | GO:0031143 | 2/80  | 18/19559  | 0.002423 | 0.015747 | 0.0096   | 2  |
| CC | GO:0005876 | 3/80  | 66/19559  | 0.002505 | 0.015817 | 0.009643 | 3  |
| CC | GO:0031093 | 3/80  | 67/19559  | 0.002615 | 0.016052 | 0.009786 | 3  |
| CC | GO:0045178 | 3/80  | 69/19559  | 0.002843 | 0.016982 | 0.010353 | 3  |
| CC | GO:0005759 | 7/80  | 473/19559 | 0.003217 | 0.018709 | 0.011406 | 7  |
| CC | GO:0098978 | 6/80  | 361/19559 | 0.00362  | 0.020513 | 0.012506 | 6  |
| CC | GO:0005819 | 6/80  | 367/19559 | 0.003923 | 0.021673 | 0.013213 | 6  |
| CC | GO:0009898 | 4/80  | 164/19559 | 0.004597 | 0.024536 | 0.014959 | 4  |
| CC | GO:0099522 | 2/80  | 25/19559  | 0.004663 | 0.024536 | 0.014959 | 2  |
| CC | GO:1902554 | 3/80  | 89/19559  | 0.005813 | 0.029875 | 0.018214 | 3  |
| CC | GO:0031091 | 3/80  | 91/19559  | 0.006182 | 0.031051 | 0.018931 | 3  |
| CC | GO:0030496 | 4/80  | 182/19559 | 0.006622 | 0.032522 | 0.019827 | 4  |
| CC | GO:0005667 | 6/80  | 413/19559 | 0.006906 | 0.032991 | 0.020114 | 6  |
| CC | GO:0005925 | 6/80  | 415/19559 | 0.007065 | 0.032991 | 0.020114 | 6  |
| CC | GO:0043202 | 3/80  | 96/19559  | 0.007166 | 0.032991 | 0.020114 | 3  |
| CC | GO:0000780 | 2/80  | 32/19559  | 0.007568 | 0.03379  | 0.020601 | 2  |
| CC | GO:0030055 | 6/80  | 423/19559 | 0.007728 | 0.03379  | 0.020601 | 6  |
| CC | GO:0031234 | 3/80  | 99/19559  | 0.007798 | 0.03379  | 0.020601 | 3  |
| CC | GO:0032839 | 2/80  | 34/19559  | 0.008515 | 0.035926 | 0.021903 | 2  |
| CC | GO:0005788 | 5/80  | 308/19559 | 0.008616 | 0.035926 | 0.021903 | 5  |
| CC | GO:1902911 | 3/80  | 104/19559 | 0.008923 | 0.036516 | 0.022263 | 3  |
| CC | GO:0051233 | 2/80  | 36/19559  | 0.009512 | 0.03822  | 0.023302 | 2  |
| MF | GO:0004674 | 19/80 | 435/18352 | 2.75E-14 | 8.57E-12 | 6.34E-12 | 19 |
| MF | GO:0004713 | 11/80 | 135/18352 | 1.54E-11 | 2.40E-09 | 1.77E-09 | 11 |
| MF | GO:0035173 | 6/80  | 17/18352  | 6.75E-11 | 7.02E-09 | 5.19E-09 | 6  |
| MF | GO:0004714 | 8/80  | 61/18352  | 2.23E-10 | 1.74E-08 | 1.28E-08 | 8  |
| MF | GO:0016303 | 5/80  | 10/18352  | 3.44E-10 | 2.14E-08 | 1.58E-08 | 5  |
| MF | GO:0035004 | 5/80  | 12/18352  | 1.07E-09 | 5.58E-08 | 4.12E-08 | 5  |
| MF | GO:0019199 | 8/80  | 80/18352  | 2.05E-09 | 9.14E-08 | 6.75E-08 | 8  |
| MF | GO:0016307 | 5/80  | 16/18352  | 5.83E-09 | 2.02E-07 | 1.49E-07 | 5  |
| MF | GO:0052742 | 5/80  | 16/18352  | 5.83E-09 | 2.02E-07 | 1.49E-07 | 5  |
| MF | GO:0004712 | 6/80  | 45/18352  | 4.03E-08 | 1.26E-06 | 9.30E-07 | 6  |
| MF | GO:0020037 | 8/80  | 138/18352 | 1.53E-07 | 4.32E-06 | 3.19E-06 | 8  |
| MF | GO:0019902 | 9/80  | 194/18352 | 1.66E-07 | 4.32E-06 | 3.19E-06 | 9  |
| MF | GO:0046906 | 8/80  | 148/18352 | 2.63E-07 | 6.30E-06 | 4.66E-06 | 8  |
| MF | GO:0051219 | 6/80  | 85/18352  | 1.89E-06 | 4.20E-05 | 3.11E-05 | 6  |
| MF | GO:0005126 | 9/80  | 271/18352 | 2.71E-06 | 5.65E-05 | 4.17E-05 | 9  |
| MF | GO:0019903 | 7/80  | 149/18352 | 3.91E-06 | 7.62E-05 | 5.63E-05 | 7  |
| MF | GO:0016725 | 3/80  | 10/18352  | 9.36E-06 | 0.000172 | 0.000127 | 3  |
| MF | GO:0016712 | 4/80  | 35/18352  | 1.58E-05 | 0.000274 | 0.000203 | 4  |
| MF | GO:0008353 | 3/80  | 12/18352  | 1.71E-05 | 0.00028  | 0.000207 | 3  |
| MF | GO:0008395 | 4/80  | 38/18352  | 2.21E-05 | 0.000344 | 0.000254 | 4  |
| MF | GO:0019838 | 6/80  | 136/18352 | 2.84E-05 | 0.000422 | 0.000312 | 6  |
| MF | GO:0042169 | 4/80  | 41/18352  | 3.00E-05 | 0.000425 | 0.000314 | 4  |
| MF | GO:0004708 | 3/80  | 18/18352  | 6.21E-05 | 0.000842 | 0.000622 | 3  |
| MF | GO:0004707 | 3/80  | 20/18352  | 8.62E-05 | 0.001121 | 0.000828 | 3  |
| MF | GO:0009055 | 5/80  | 111/18352 | 0.000124 | 0.001546 | 0.001142 | 5  |
| MF | GO:0070330 | 3/80  | 25/18352  | 0.000171 | 0.002054 | 0.001518 | 3  |
| MF | GO:0004129 | 3/80  | 28/18352  | 0.000242 | 0.002599 | 0.00192  | 3  |
| MF | GO:0015002 | 3/80  | 28/18352  | 0.000242 | 0.002599 | 0.00192  | 3  |
| MF | GO:0016676 | 3/80  | 28/18352  | 0.000242 | 0.002599 | 0.00192  | 3  |
| MF | GO:0004693 | 3/80  | 29/18352  | 0.000269 | 0.002619 | 0.001935 | 3  |
| MF | GO:0016675 | 3/80  | 29/18352  | 0.000269 | 0.002619 | 0.001935 | 3  |
| MF | GO:0097472 | 3/80  | 29/18352  | 0.000269 | 0.002619 | 0.001935 | 3  |
| MF | GO:0030332 | 3/80  | 30/18352  | 0.000297 | 0.002813 | 0.002078 | 3  |
| MF | GO:0002020 | 5/80  | 137/18352 | 0.000331 | 0.003034 | 0.002242 | 5  |
| MF | GO:0019825 | 3/80  | 36/18352  | 0.000513 | 0.004477 | 0.003308 | 3  |

|    |            |      |           |          |          |          |   |
|----|------------|------|-----------|----------|----------|----------|---|
| MF | GO:0005506 | 5/80 | 151/18352 | 0.000517 | 0.004477 | 0.003308 | 5 |
| MF | GO:0005125 | 6/80 | 235/18352 | 0.000564 | 0.004756 | 0.003514 | 6 |
| MF | GO:0001784 | 3/80 | 42/18352  | 0.00081  | 0.006604 | 0.00488  | 3 |
| MF | GO:0043560 | 2/80 | 10/18352  | 0.000826 | 0.006604 | 0.00488  | 2 |
| MF | GO:0004497 | 4/80 | 101/18352 | 0.000992 | 0.007549 | 0.005578 | 4 |
| MF | GO:0016709 | 3/80 | 45/18352  | 0.000992 | 0.007549 | 0.005578 | 3 |
| MF | GO:0004715 | 3/80 | 46/18352  | 0.001058 | 0.007859 | 0.005807 | 3 |
| MF | GO:0017171 | 5/80 | 191/18352 | 0.001482 | 0.010752 | 0.007944 | 5 |
| MF | GO:0045309 | 3/80 | 53/18352  | 0.001597 | 0.011326 | 0.008368 | 3 |
| MF | GO:0035259 | 2/80 | 15/18352  | 0.001899 | 0.012882 | 0.009518 | 2 |
| MF | GO:0097153 | 2/80 | 15/18352  | 0.001899 | 0.012882 | 0.009518 | 2 |
| MF | GO:0008392 | 2/80 | 16/18352  | 0.002164 | 0.014368 | 0.010616 | 2 |
| MF | GO:0005507 | 3/80 | 60/18352  | 0.002283 | 0.014838 | 0.010963 | 3 |
| MF | GO:0008391 | 2/80 | 20/18352  | 0.003388 | 0.02079  | 0.015361 | 2 |
| MF | GO:0070182 | 2/80 | 20/18352  | 0.003388 | 0.02079  | 0.015361 | 2 |
| MF | GO:0016811 | 3/80 | 69/18352  | 0.003398 | 0.02079  | 0.015361 | 3 |
| MF | GO:0042379 | 3/80 | 70/18352  | 0.003539 | 0.021237 | 0.015691 | 3 |
| MF | GO:0004709 | 2/80 | 24/18352  | 0.004867 | 0.028651 | 0.021169 | 2 |
| MF | GO:0016702 | 2/80 | 25/18352  | 0.005275 | 0.029588 | 0.021861 | 2 |
| MF | GO:0048018 | 7/80 | 487/18352 | 0.005322 | 0.029588 | 0.021861 | 7 |
| MF | GO:0035258 | 3/80 | 81/18352  | 0.005331 | 0.029588 | 0.021861 | 3 |
| MF | GO:0008083 | 4/80 | 162/18352 | 0.0055   | 0.029588 | 0.021861 | 4 |
| MF | GO:0016705 | 4/80 | 162/18352 | 0.0055   | 0.029588 | 0.021861 | 4 |
| MF | GO:0030546 | 7/80 | 492/18352 | 0.005621 | 0.029634 | 0.021896 | 7 |
| MF | GO:0016701 | 2/80 | 26/18352  | 0.005699 | 0.029634 | 0.021896 | 2 |
| MF | GO:0004252 | 4/80 | 169/18352 | 0.006377 | 0.032618 | 0.0241   | 4 |
| MF | GO:0051427 | 4/80 | 177/18352 | 0.007488 | 0.03768  | 0.027841 | 4 |
| MF | GO:0008236 | 4/80 | 187/18352 | 0.009046 | 0.044255 | 0.032698 | 4 |
| MF | GO:0001530 | 2/80 | 33/18352  | 0.009078 | 0.044255 | 0.032698 | 2 |
| MF | GO:0008022 | 4/80 | 189/18352 | 0.009382 | 0.045032 | 0.033272 | 4 |
| MF | GO:0016922 | 3/80 | 101/18352 | 0.009786 | 0.046261 | 0.034181 | 3 |
| MF | GO:0008144 | 3/80 | 104/18352 | 0.010595 | 0.049336 | 0.036452 | 3 |
