# Supplementary material for: Identifying and Targeting Prediction of the PI3K-AKT Signaling Pathway in Drug-Induced Thrombocytopenia in Infected Patients Receiving Linezolid Therapy: A Network Pharmacology-Based Analysis
Source: Hindawi journal article supplement (doi:10.1155/2022/2282351), 2022-10-15
Supplement: f1 [file 2282351.f1.zip]

| SUID   | AverageShort | Betweenness | (Closeness | Cer  | ClusteringC | ccDegree | Eccentricity | name |
|--------|--------------|-------------|------------|------|-------------|----------|--------------|------|
| 72.00  | 2.12         | 0.00        | 0.47       | 1.00 | 4.00        | 3.00     | ACHE         |      |
| 73.00  | 1.67         | 0.04        | 0.60       | 0.43 | 28.00       | 3.00     | CAT          |      |
| 75.00  | 1.37         | 0.20        | 0.73       | 0.30 | 49.00       | 2.00     | ALB          |      |
| 77.00  | 1.41         | 0.09        | 0.71       | 0.35 | 47.00       | 3.00     | AKT1         |      |
| 79.00  | 1.51         | 0.07        | 0.66       | 0.36 | 42.00       | 3.00     | IL6          |      |
| 81.00  | 1.73         | 0.01        | 0.58       | 0.57 | 25.00       | 3.00     | MAPK1        |      |
| 83.00  | 2.12         | 0.00        | 0.47       | 0.78 | 11.00       | 4.00     | AURKA        |      |
| 85.00  | 1.72         | 0.02        | 0.58       | 0.51 | 29.00       | 3.00     | CCL2         |      |
| 87.00  | 1.94         | 0.00        | 0.52       | 0.79 | 14.00       | 3.00     | CD38         |      |
| 89.00  | 1.71         | 0.02        | 0.59       | 0.50 | 29.00       | 3.00     | IFNG         |      |
| 91.00  | 1.81         | 0.01        | 0.55       | 0.66 | 22.00       | 3.00     | MAPK14       |      |
| 94.00  | 1.90         | 0.00        | 0.53       | 0.65 | 18.00       | 3.00     | FLT3         |      |
| 96.00  | 2.08         | 0.00        | 0.48       | 0.76 | 13.00       | 4.00     | RAF1         |      |
| 98.00  | 1.86         | 0.00        | 0.54       | 0.73 | 21.00       | 3.00     | EPO          |      |
| 100.00 | 1.88         | 0.00        | 0.53       | 0.69 | 18.00       | 3.00     | CDK4         |      |
| 102.00 | 1.76         | 0.01        | 0.57       | 0.68 | 23.00       | 3.00     | KDR          |      |
| 104.00 | 1.82         | 0.01        | 0.55       | 0.52 | 29.00       | 4.00     | PIK3CA       |      |
| 106.00 | 1.60         | 0.03        | 0.62       | 0.47 | 37.00       | 3.00     | STAT3        |      |
| 108.00 | 2.08         | 0.00        | 0.48       | 0.86 | 8.00        | 3.00     | PIK3C2A      |      |
| 110.00 | 1.82         | 0.01        | 0.55       | 0.60 | 19.00       | 3.00     | CDK2         |      |
| 112.00 | 1.62         | 0.05        | 0.62       | 0.46 | 34.00       | 3.00     | ERBB2        |      |
| 114.00 | 1.47         | 0.07        | 0.68       | 0.40 | 43.00       | 3.00     | EGFR         |      |
| 116.00 | 1.78         | 0.00        | 0.56       | 0.68 | 24.00       | 3.00     | KIT          |      |
| 118.00 | 1.94         | 0.00        | 0.52       | 0.59 | 22.00       | 3.00     | PIK3CB       |      |
| 121.00 | 1.92         | 0.01        | 0.52       | 0.50 | 12.00       | 3.00     | LRRK2        |      |
| 123.00 | 1.92         | 0.01        | 0.52       | 0.68 | 15.00       | 3.00     | PRKDC        |      |
| 125.00 | 2.09         | 0.00        | 0.48       | 0.82 | 10.00       | 4.00     | TBK1         |      |
| 127.00 | 2.17         | 0.00        | 0.46       | 0.86 | 8.00        | 4.00     | P2RX7        |      |
| 129.00 | 1.92         | 0.02        | 0.52       | 0.64 | 16.00       | 3.00     | SELE         |      |
| 131.00 | 1.90         | 0.01        | 0.53       | 0.66 | 16.00       | 3.00     | NLRP3        |      |
| 133.00 | 2.00         | 0.01        | 0.50       | 0.49 | 10.00       | 3.00     | CYP3A4       |      |
| 135.00 | 2.00         | 0.00        | 0.50       | 0.66 | 19.00       | 4.00     | PIK3CG       |      |
| 137.00 | 1.96         | 0.02        | 0.51       | 0.56 | 11.00       | 3.00     | MT-CYB       |      |
| 139.00 | 1.55         | 0.03        | 0.64       | 0.46 | 41.00       | 3.00     | MTOR         |      |
| 141.00 | 1.96         | 0.02        | 0.51       | 0.42 | 13.00       | 4.00     | PTGS1        |      |
| 143.00 | 1.78         | 0.01        | 0.56       | 0.59 | 23.00       | 3.00     | PARP1        |      |
| 145.00 | 1.96         | 0.00        | 0.51       | 0.76 | 13.00       | 3.00     | CASP7        |      |
| 147.00 | 2.08         | 0.00        | 0.48       | 0.58 | 9.00        | 4.00     | ALOX5        |      |
| 149.00 | 2.03         | 0.00        | 0.49       | 0.67 | 19.00       | 4.00     | PIK3CD       |      |
| 151.00 | 1.82         | 0.02        | 0.55       | 0.54 | 19.00       | 3.00     | RAD51        |      |
| 153.00 | 1.86         | 0.03        | 0.54       | 0.42 | 14.00       | 3.00     | HSPD1        |      |
| 155.00 | 1.87         | 0.01        | 0.53       | 0.69 | 16.00       | 3.00     | CDK1         |      |
| 157.00 | 1.88         | 0.00        | 0.53       | 0.76 | 18.00       | 3.00     | MAPK8        |      |
| 160.00 | 1.85         | 0.01        | 0.54       | 0.57 | 20.00       | 3.00     | CHEK1        |      |
| 162.00 | 1.92         | 0.00        | 0.52       | 0.84 | 16.00       | 3.00     | FGFR1        |      |
| 164.00 | 1.63         | 0.03        | 0.61       | 0.44 | 34.00       | 3.00     | IL10         |      |
| 166.00 | 1.87         | 0.00        | 0.53       | 0.70 | 19.00       | 3.00     | CASP1        |      |
| 168.00 | 2.04         | 0.00        | 0.49       | 0.71 | 11.00       | 3.00     | ELANE        |      |
| 171.00 | 2.10         | 0.00        | 0.48       | 0.50 | 8.00        | 3.00     | PLAT         |      |
| 181.00 | 2.26         | 0.00        | 0.44       | 0.60 | 5.00        | 3.00     | CYP2C9       |      |

|        |      |      |      |      |       |      |         |
|--------|------|------|------|------|-------|------|---------|
| 185.00 | 2.31 | 0.00 | 0.43 | 0.67 | 3.00  | 3.00 | KLKB1   |
| 191.00 | 1.90 | 0.00 | 0.53 | 0.76 | 17.00 | 3.00 | FLT1    |
| 197.00 | 2.27 | 0.03 | 0.44 | 0.30 | 5.00  | 3.00 | GBA     |
| 201.00 | 2.24 | 0.00 | 0.45 | 0.53 | 6.00  | 3.00 | CYP2C19 |
| 205.00 | 1.87 | 0.01 | 0.53 | 0.58 | 21.00 | 3.00 | SYK     |
| 209.00 | 2.28 | 0.00 | 0.44 | 0.67 | 4.00  | 3.00 | CYP2D6  |
| 211.00 | 2.04 | 0.02 | 0.49 | 0.53 | 11.00 | 3.00 | MT-CO1  |
| 215.00 | 1.83 | 0.00 | 0.55 | 0.69 | 22.00 | 3.00 | JAK2    |
| 218.00 | 2.19 | 0.01 | 0.46 | 0.50 | 5.00  | 3.00 | F10     |
| 220.00 | 1.90 | 0.00 | 0.53 | 0.75 | 17.00 | 3.00 | MET     |
| 237.00 | 3.26 | 0.00 | 0.31 | 0.00 | 1.00  | 4.00 | ASAH1   |
| 245.00 | 2.37 | 0.00 | 0.42 | 0.71 | 8.00  | 4.00 | FANCI   |
| 249.00 | 2.21 | 0.00 | 0.45 | 0.64 | 13.00 | 4.00 | AURKB   |
| 263.00 | 2.50 | 0.00 | 0.40 | 0.58 | 11.00 | 4.00 | C10orf2 |
| 264.00 | 2.28 | 0.01 | 0.44 | 0.42 | 12.00 | 4.00 | RRM2B   |
| 266.00 | 2.60 | 0.00 | 0.38 | 0.69 | 10.00 | 4.00 | DGUOK   |
| 268.00 | 2.54 | 0.01 | 0.39 | 0.56 | 11.00 | 4.00 | POLG    |
| 270.00 | 2.28 | 0.01 | 0.44 | 0.47 | 10.00 | 3.00 | SLC25A4 |
| 272.00 | 2.62 | 0.00 | 0.38 | 0.86 | 7.00  | 4.00 | MT-ND6  |
| 275.00 | 2.06 | 0.01 | 0.48 | 0.50 | 12.00 | 4.00 | MT-CO2  |
| 279.00 | 2.15 | 0.01 | 0.46 | 0.57 | 8.00  | 4.00 | TYMP    |
| 281.00 | 2.40 | 0.00 | 0.42 | 0.71 | 7.00  | 4.00 | MPV17   |
| 349.00 | 2.38 | 0.00 | 0.42 | 1.00 | 5.00  | 4.00 | IDO1    |
| 352.00 | 2.41 | 0.00 | 0.41 | 0.80 | 6.00  | 4.00 | PPBP    |
| 371.00 | 2.09 | 0.00 | 0.48 | 0.54 | 14.00 | 4.00 | ZAP70   |
| 420.00 | 2.60 | 0.00 | 0.38 | 0.00 | 1.00  | 4.00 | CNR2    |
| 524.00 | 2.87 | 0.00 | 0.35 | 0.00 | 2.00  | 4.00 | F5      |
| 571.00 | 2.85 | 0.00 | 0.35 | 0.00 | 1.00  | 4.00 | PABPC1  |
| 593.00 | 2.40 | 0.00 | 0.42 | 1.00 | 4.00  | 4.00 | RORC    |

| Neighborhood | NumberOfDi | Radiality | Stress  | TopologicalCoefficient |
|--------------|------------|-----------|---------|------------------------|
| 41.50        | 4.00       | 0.72      | 0.00    | 0.64                   |
| 22.61        | 28.00      | 0.83      | 2322.00 | 0.30                   |
| 19.04        | 49.00      | 0.91      | 6124.00 | 0.24                   |
| 20.51        | 47.00      | 0.90      | 3586.00 | 0.27                   |
| 20.12        | 42.00      | 0.87      | 3424.00 | 0.27                   |
| 26.20        | 25.00      | 0.82      | 1014.00 | 0.35                   |
| 23.18        | 11.00      | 0.72      | 148.00  | 0.39                   |
| 23.45        | 29.00      | 0.82      | 1282.00 | 0.33                   |
| 30.79        | 14.00      | 0.77      | 102.00  | 0.45                   |
| 23.90        | 29.00      | 0.82      | 1672.00 | 0.33                   |
| 28.09        | 22.00      | 0.80      | 386.00  | 0.40                   |
| 28.28        | 18.00      | 0.78      | 370.00  | 0.42                   |
| 28.69        | 13.00      | 0.73      | 102.00  | 0.48                   |
| 29.14        | 21.00      | 0.79      | 290.00  | 0.43                   |
| 26.39        | 18.00      | 0.78      | 306.00  | 0.38                   |
| 27.61        | 23.00      | 0.81      | 898.00  | 0.38                   |
| 22.66        | 29.00      | 0.79      | 692.00  | 0.35                   |
| 22.95        | 37.00      | 0.85      | 1904.00 | 0.32                   |
| 32.75        | 8.00       | 0.73      | 68.00   | 0.51                   |
| 24.21        | 19.00      | 0.79      | 674.00  | 0.33                   |
| 23.12        | 34.00      | 0.85      | 2192.00 | 0.32                   |
| 21.81        | 43.00      | 0.88      | 3284.00 | 0.29                   |
| 27.42        | 24.00      | 0.80      | 444.00  | 0.39                   |
| 22.86        | 22.00      | 0.77      | 298.00  | 0.37                   |
| 26.50        | 12.00      | 0.77      | 526.00  | 0.37                   |
| 24.80        | 15.00      | 0.77      | 356.00  | 0.36                   |
| 31.50        | 10.00      | 0.73      | 38.00   | 0.51                   |
| 28.75        | 8.00       | 0.71      | 12.00   | 0.50                   |
| 27.31        | 16.00      | 0.77      | 1012.00 | 0.41                   |
| 26.81        | 16.00      | 0.78      | 390.00  | 0.38                   |
| 27.00        | 10.00      | 0.75      | 290.00  | 0.40                   |
| 24.47        | 19.00      | 0.75      | 184.00  | 0.41                   |
| 19.36        | 11.00      | 0.76      | 1192.00 | 0.28                   |
| 22.95        | 41.00      | 0.86      | 1954.00 | 0.32                   |
| 20.00        | 13.00      | 0.76      | 966.00  | 0.29                   |
| 25.52        | 23.00      | 0.80      | 938.00  | 0.35                   |
| 29.31        | 13.00      | 0.76      | 74.00   | 0.43                   |
| 25.00        | 9.00       | 0.73      | 154.00  | 0.39                   |
| 23.63        | 19.00      | 0.74      | 142.00  | 0.41                   |
| 23.74        | 19.00      | 0.79      | 1482.00 | 0.33                   |
| 23.36        | 14.00      | 0.79      | 1370.00 | 0.31                   |
| 24.25        | 16.00      | 0.78      | 604.00  | 0.34                   |
| 30.78        | 18.00      | 0.78      | 122.00  | 0.45                   |
| 23.30        | 20.00      | 0.79      | 822.00  | 0.33                   |
| 29.19        | 16.00      | 0.77      | 98.00   | 0.43                   |
| 21.97        | 34.00      | 0.84      | 2214.00 | 0.30                   |
| 27.42        | 19.00      | 0.78      | 224.00  | 0.40                   |
| 26.36        | 11.00      | 0.74      | 210.00  | 0.41                   |
| 22.25        | 8.00       | 0.72      | 126.00  | 0.36                   |
| 17.40        | 5.00       | 0.69      | 22.00   | 0.33                   |

|       |       |      |         |      |
|-------|-------|------|---------|------|
| 21.67 | 3.00  | 0.67 | 8.00    | 0.42 |
| 29.29 | 17.00 | 0.78 | 230.00  | 0.42 |
| 13.80 | 5.00  | 0.68 | 584.00  | 0.27 |
| 15.00 | 6.00  | 0.69 | 40.00   | 0.28 |
| 26.14 | 21.00 | 0.78 | 424.00  | 0.39 |
| 17.50 | 4.00  | 0.68 | 16.00   | 0.34 |
| 16.55 | 11.00 | 0.74 | 1042.00 | 0.26 |
| 27.36 | 22.00 | 0.79 | 350.00  | 0.40 |
| 22.20 | 5.00  | 0.70 | 228.00  | 0.39 |
| 28.29 | 17.00 | 0.78 | 206.00  | 0.41 |
| 5.00  | 1.00  | 0.44 | 0.00    | 0.00 |
| 16.00 | 8.00  | 0.66 | 140.00  | 0.38 |
| 19.62 | 13.00 | 0.70 | 144.00  | 0.38 |
| 10.73 | 11.00 | 0.63 | 150.00  | 0.33 |
| 14.00 | 12.00 | 0.68 | 552.00  | 0.30 |
| 10.00 | 10.00 | 0.60 | 58.00   | 0.38 |
| 9.73  | 11.00 | 0.62 | 130.00  | 0.33 |
| 12.00 | 10.00 | 0.68 | 402.00  | 0.26 |
| 11.29 | 7.00  | 0.60 | 104.00  | 0.43 |
| 15.08 | 12.00 | 0.73 | 926.00  | 0.24 |
| 17.25 | 8.00  | 0.71 | 676.00  | 0.29 |
| 12.86 | 7.00  | 0.65 | 222.00  | 0.32 |
| 34.20 | 5.00  | 0.65 | 0.00    | 0.73 |
| 25.50 | 6.00  | 0.65 | 6.00    | 0.58 |
| 24.79 | 14.00 | 0.73 | 198.00  | 0.43 |
| 34.00 | 1.00  | 0.60 | 0.00    | 0.00 |
| 10.50 | 2.00  | 0.53 | 2.00    | 0.59 |
| 14.00 | 1.00  | 0.54 | 0.00    | 0.00 |
| 35.50 | 4.00  | 0.65 | 0.00    | 0.76 |
