# Supplementary material for: Identifying and Targeting Prediction of the PI3K-AKT Signaling Pathway in Drug-Induced Thrombocytopenia in Infected Patients Receiving Linezolid Therapy: A Network Pharmacology-Based Analysis
Source: Hindawi journal article supplement (doi:10.1155/2022/2282351), 2022-10-15
Supplement: f1 [file 2282351.f1.zip]

MAOA  
LACTB  
MAOB  
CYP3A4  
CYP2D6  
CYP2C9  
CYP1A2  
F5  
POLG  
TYMP  
SCO2  
EDAR  
ALB  
IL6  
SLC22A6  
SLC22A8  
CFTR  
MT-CO2  
PIK3C2A  
CYP3A5  
CYP2C19  
CYP2E1  
RPL4  
IFNG  
CCL2  
IL10  
PDF  
RRM2B  
SLC25A4  
GHR  
DGUOK  
FANCI  
MPV17  
POLG2  
SSBP1  
TMEM70  
NT5M  
UPP2  
TEFM  
TWNK  
MT-TT  
MT-TM  
PPBP  
NLRP3

MT-TL1  
MT-TK  
GHRL  
CLPB  
MT-ND5  
MT-TF  
CAT  
FASN  
HSPD1  
EPO  
MT-CO1  
MT-ND6  
MT-ND1  
MT-CO3  
MT-CYB  
MT-TS1  
MT-TV  
MT-TI  
MT-TS2  
MT-TW  
MT-TQ  
MT-TC  
MT-TP  
F10  
STAT3  
GBA  
MAPK14  
NAMPT  
PRKDC  
RORC  
KDR  
MMP13  
RPS6KA3  
RPS6KA2  
PDE10A  
PIK3CB  
HPGDS  
SMO  
CHEK1  
P2RX7  
SYK  
MET  
TNKS2  
LRRK2

RAF1  
JAK2  
PARP1  
PDE9A  
ASAH1  
CNR1  
CNR2  
PIK3CD  
PIK3CG  
PIK3CA  
TNIK  
MELK  
GABRA5  
ALOX5  
PDE1C  
AVPR2  
PLAT  
AVPR1A  
KLKB1  
NTRK1  
GRM5  
MAPK1  
CD38  
TBK1  
SMG1  
CASP6  
CASP7  
GCK  
AKT1  
CASP1  
MCHR1  
TSPO  
PABPC1  
FLT1  
MAP3K12  
FGFR1  
ADORA1  
ADORA2A  
ADORA3  
IRAK4  
CCNE1  
FLT3  
CDK9  
TDO2

ACHE  
ELANE  
GSK3B  
CDK2  
ADK  
IDO1  
PDE3A  
PDE3B  
CA12  
CAPN1  
HSD11B1  
EPHB4  
ERBB2  
EGFR  
MTOR  
CCR8  
PTK6  
MAP3K8  
SLC6A9  
AURKB  
CDK1  
CDK4  
LIPE  
NAAA  
MMP12  
AURKA  
ZAP70  
PDE1A  
SELE  
PDE1B  
KIT  
SCN5A  
MAPK8  
CCNT1  
ACACB  
AKR1C3  
CYP2J2  
COPS5  
FADS1  
GRM2  
HKDC1  
SLC16A3  
NPY2R  
PIK3C2G

PDE8B  
RAD1  
RAD51  
SLC6A5  
SIGMAR1  
STAMBP  
STAT6
