# Supplementary material for: Identifying and Targeting Prediction of the PI3K-AKT Signaling Pathway in Drug-Induced Thrombocytopenia in Infected Patients Receiving Linezolid Therapy: A Network Pharmacology-Based Analysis
Source: Hindawi journal article supplement (doi:10.1155/2022/2282351), 2022-10-15
Supplement: f1 [file 2282351.f1.zip]

| ID       | GeneRatio | BgRatio  | pvalue   | p.adjust | qvalue   | Count |
|----------|-----------|----------|----------|----------|----------|-------|
| hsa01521 | 14/82     | 79/8142  | 2.57E-14 | 5.71E-12 | 1.76E-12 | 14    |
| hsa05230 | 13/82     | 70/8142  | 1.23E-13 | 1.36E-11 | 4.19E-12 | 13    |
| hsa05212 | 13/82     | 76/8142  | 3.76E-13 | 2.78E-11 | 8.58E-12 | 13    |
| hsa05417 | 18/82     | 215/8142 | 2.52E-12 | 1.16E-10 | 3.56E-11 | 18    |
| hsa04151 | 22/82     | 354/8142 | 2.69E-12 | 1.16E-10 | 3.56E-11 | 22    |
| hsa05235 | 13/82     | 89/8142  | 3.12E-12 | 1.16E-10 | 3.56E-11 | 13    |
| hsa01522 | 13/82     | 98/8142  | 1.11E-11 | 3.52E-10 | 1.09E-10 | 13    |
| hsa04933 | 13/82     | 100/8142 | 1.45E-11 | 4.01E-10 | 1.24E-10 | 13    |
| hsa04625 | 13/82     | 104/8142 | 2.41E-11 | 5.95E-10 | 1.83E-10 | 13    |
| hsa04068 | 14/82     | 131/8142 | 3.36E-11 | 7.45E-10 | 2.30E-10 | 14    |
| hsa04066 | 13/82     | 109/8142 | 4.43E-11 | 8.94E-10 | 2.75E-10 | 13    |
| hsa05208 | 17/82     | 223/8142 | 5.00E-11 | 9.25E-10 | 2.85E-10 | 17    |
| hsa05167 | 16/82     | 194/8142 | 6.11E-11 | 9.81E-10 | 3.02E-10 | 16    |
| hsa05135 | 14/82     | 137/8142 | 6.19E-11 | 9.81E-10 | 3.02E-10 | 14    |
| hsa05223 | 11/82     | 72/8142  | 9.98E-11 | 1.48E-09 | 4.55E-10 | 11    |
| hsa05164 | 15/82     | 171/8142 | 1.08E-10 | 1.50E-09 | 4.63E-10 | 15    |
| hsa05215 | 12/82     | 97/8142  | 1.70E-10 | 2.22E-09 | 6.85E-10 | 12    |
| hsa04218 | 14/82     | 156/8142 | 3.58E-10 | 4.41E-09 | 1.36E-09 | 14    |
| hsa04660 | 12/82     | 104/8142 | 3.90E-10 | 4.56E-09 | 1.41E-09 | 12    |
| hsa04014 | 16/82     | 232/8142 | 8.84E-10 | 9.81E-09 | 3.02E-09 | 16    |
| hsa05221 | 10/82     | 67/8142  | 9.53E-10 | 1.01E-08 | 3.11E-09 | 10    |
| hsa04664 | 10/82     | 68/8142  | 1.11E-09 | 1.12E-08 | 3.45E-09 | 10    |
| hsa04917 | 10/82     | 70/8142  | 1.49E-09 | 1.44E-08 | 4.43E-09 | 10    |
| hsa05218 | 10/82     | 72/8142  | 1.98E-09 | 1.83E-08 | 5.64E-09 | 10    |
| hsa04914 | 11/82     | 102/8142 | 4.62E-09 | 3.94E-08 | 1.22E-08 | 11    |
| hsa05142 | 11/82     | 102/8142 | 4.62E-09 | 3.94E-08 | 1.22E-08 | 11    |
| hsa04630 | 13/82     | 162/8142 | 6.43E-09 | 5.10E-08 | 1.57E-08 | 13    |
| hsa05161 | 13/82     | 162/8142 | 6.43E-09 | 5.10E-08 | 1.57E-08 | 13    |
| hsa04012 | 10/82     | 85/8142  | 1.04E-08 | 7.96E-08 | 2.45E-08 | 10    |
| hsa05415 | 14/82     | 203/8142 | 1.13E-08 | 8.39E-08 | 2.58E-08 | 14    |
| hsa04668 | 11/82     | 112/8142 | 1.26E-08 | 8.92E-08 | 2.75E-08 | 11    |
| hsa05205 | 14/82     | 205/8142 | 1.29E-08 | 8.92E-08 | 2.75E-08 | 14    |
| hsa05224 | 12/82     | 147/8142 | 2.14E-08 | 1.44E-07 | 4.44E-08 | 12    |
| hsa04935 | 11/82     | 119/8142 | 2.38E-08 | 1.56E-07 | 4.80E-08 | 11    |
| hsa04932 | 12/82     | 155/8142 | 3.89E-08 | 2.46E-07 | 7.60E-08 | 12    |
| hsa05163 | 14/82     | 225/8142 | 4.21E-08 | 2.59E-07 | 7.99E-08 | 14    |
| hsa05160 | 12/82     | 157/8142 | 4.49E-08 | 2.69E-07 | 8.29E-08 | 12    |
| hsa05214 | 9/82      | 75/8142  | 4.99E-08 | 2.92E-07 | 8.99E-08 | 9     |
| hsa05171 | 14/82     | 232/8142 | 6.19E-08 | 3.52E-07 | 1.09E-07 | 14    |
| hsa05213 | 8/82      | 58/8142  | 9.54E-08 | 5.29E-07 | 1.63E-07 | 8     |
| hsa04659 | 10/82     | 108/8142 | 1.07E-07 | 5.78E-07 | 1.78E-07 | 10    |
| hsa04370 | 8/82      | 59/8142  | 1.09E-07 | 5.78E-07 | 1.78E-07 | 8     |
| hsa05418 | 11/82     | 139/8142 | 1.20E-07 | 6.20E-07 | 1.91E-07 | 11    |
| hsa04015 | 13/82     | 210/8142 | 1.43E-07 | 7.24E-07 | 2.23E-07 | 13    |
| hsa05132 | 14/82     | 249/8142 | 1.49E-07 | 7.29E-07 | 2.25E-07 | 14    |
| hsa05145 | 10/82     | 112/8142 | 1.51E-07 | 7.29E-07 | 2.25E-07 | 10    |
| hsa05210 | 9/82      | 86/8142  | 1.67E-07 | 7.90E-07 | 2.43E-07 | 9     |
| hsa04072 | 11/82     | 148/8142 | 2.28E-07 | 1.06E-06 | 3.26E-07 | 11    |
| hsa05226 | 11/82     | 149/8142 | 2.45E-07 | 1.11E-06 | 3.42E-07 | 11    |
| hsa04613 | 12/82     | 190/8142 | 3.66E-07 | 1.63E-06 | 5.01E-07 | 12    |

|          |       |          |           |           |           |    |
|----------|-------|----------|-----------|-----------|-----------|----|
| hsa05231 | 9/82  | 98/8142  | 5.19E-07  | 2.26E-06  | 6.96E-07  | 9  |
| hsa04510 | 12/82 | 201/8142 | 6.72E-07  | 2.87E-06  | 8.84E-07  | 12 |
| hsa05169 | 12/82 | 202/8142 | 7.08E-07  | 2.97E-06  | 9.14E-07  | 12 |
| hsa05133 | 8/82  | 76/8142  | 8.10E-07  | 3.33E-06  | 1.03E-06  | 8  |
| hsa04620 | 9/82  | 104/8142 | 8.63E-07  | 3.48E-06  | 1.07E-06  | 9  |
| hsa05010 | 16/82 | 384/8142 | 1.05E-06  | 4.16E-06  | 1.28E-06  | 16 |
| hsa05162 | 10/82 | 139/8142 | 1.14E-06  | 4.45E-06  | 1.37E-06  | 10 |
| hsa05170 | 12/82 | 212/8142 | 1.19E-06  | 4.54E-06  | 1.40E-06  | 12 |
| hsa04550 | 10/82 | 143/8142 | 1.48E-06  | 5.58E-06  | 1.72E-06  | 10 |
| hsa05152 | 11/82 | 180/8142 | 1.63E-06  | 6.02E-06  | 1.85E-06  | 11 |
| hsa04071 | 9/82  | 119/8142 | 2.69E-06  | 9.79E-06  | 3.02E-06  | 9  |
| hsa05020 | 13/82 | 273/8142 | 2.86E-06  | 1.02E-05  | 3.16E-06  | 13 |
| hsa05219 | 6/82  | 41/8142  | 2.94E-06  | 1.04E-05  | 3.20E-06  | 6  |
| hsa04062 | 11/82 | 192/8142 | 3.06E-06  | 1.06E-05  | 3.27E-06  | 11 |
| hsa04380 | 9/82  | 128/8142 | 4.93E-06  | 1.68E-05  | 5.18E-06  | 9  |
| hsa04926 | 9/82  | 129/8142 | 5.25E-06  | 1.75E-05  | 5.40E-06  | 9  |
| hsa05211 | 7/82  | 69/8142  | 5.29E-06  | 1.75E-05  | 5.40E-06  | 7  |
| hsa05131 | 12/82 | 247/8142 | 5.85E-06  | 1.90E-05  | 5.84E-06  | 12 |
| hsa04930 | 6/82  | 46/8142  | 5.89E-06  | 1.90E-05  | 5.84E-06  | 6  |
| hsa05225 | 10/82 | 168/8142 | 6.36E-06  | 2.02E-05  | 6.22E-06  | 10 |
| hsa04010 | 13/82 | 294/8142 | 6.46E-06  | 2.02E-05  | 6.23E-06  | 13 |
| hsa05207 | 11/82 | 212/8142 | 7.96E-06  | 2.45E-05  | 7.57E-06  | 11 |
| hsa04210 | 9/82  | 136/8142 | 8.10E-06  | 2.46E-05  | 7.60E-06  | 9  |
| hsa05144 | 6/82  | 50/8142  | 9.68E-06  | 2.90E-05  | 8.95E-06  | 6  |
| hsa05220 | 7/82  | 76/8142  | 1.01E-05  | 3.00E-05  | 9.24E-06  | 7  |
| hsa04140 | 9/82  | 141/8142 | 1.09E-05  | 3.18E-05  | 9.79E-06  | 9  |
| hsa04931 | 8/82  | 108/8142 | 1.17E-05  | 3.36E-05  | 1.04E-05  | 8  |
| hsa05166 | 11/82 | 222/8142 | 1.23E-05  | 3.51E-05  | 1.08E-05  | 11 |
| hsa04725 | 8/82  | 113/8142 | 1.63E-05  | 4.58E-05  | 1.41E-05  | 8  |
| hsa05022 | 16/82 | 476/8142 | 1.67E-05  | 4.60E-05  | 1.42E-05  | 16 |
| hsa04662 | 7/82  | 82/8142  | 1.68E-05  | 4.60E-05  | 1.42E-05  | 7  |
| hsa04722 | 8/82  | 119/8142 | 2.38E-05  | 6.44E-05  | 1.98E-05  | 8  |
| hsa05143 | 5/82  | 37/8142  | 3.10E-05  | 8.30E-05  | 2.56E-05  | 5  |
| hsa04611 | 8/82  | 124/8142 | 3.20E-05  | 8.47E-05  | 2.61E-05  | 8  |
| hsa04213 | 6/82  | 62/8142  | 3.40E-05  | 8.88E-05  | 2.74E-05  | 6  |
| hsa05203 | 10/82 | 204/8142 | 3.47E-05  | 8.97E-05  | 2.76E-05  | 10 |
| hsa04929 | 6/82  | 64/8142  | 4.08E-05  | 0.0001035 | 3.19E-05  | 6  |
| hsa04657 | 7/82  | 94/8142  | 4.10E-05  | 0.0001035 | 3.19E-05  | 7  |
| hsa04650 | 8/82  | 131/8142 | 4.76E-05  | 0.0001187 | 3.66E-05  | 8  |
| hsa04666 | 7/82  | 97/8142  | 5.02E-05  | 0.0001239 | 3.82E-05  | 7  |
| hsa04910 | 8/82  | 137/8142 | 6.55E-05  | 0.0001597 | 4.92E-05  | 8  |
| hsa01524 | 6/82  | 73/8142  | 8.62E-05  | 0.0002081 | 6.41E-05  | 6  |
| hsa05017 | 8/82  | 143/8142 | 8.86E-05  | 0.0002113 | 6.51E-05  | 8  |
| hsa04621 | 9/82  | 184/8142 | 8.95E-05  | 0.0002113 | 6.51E-05  | 9  |
| hsa04217 | 8/82  | 159/8142 | 0.0001856 | 0.0004338 | 0.0001337 | 8  |
| hsa04919 | 7/82  | 121/8142 | 0.0002034 | 0.0004704 | 0.000145  | 7  |
| hsa04211 | 6/82  | 89/8142  | 0.000259  | 0.0005928 | 0.0001827 | 6  |
| hsa04658 | 6/82  | 92/8142  | 0.0003103 | 0.0006958 | 0.0002145 | 6  |
| hsa05222 | 6/82  | 92/8142  | 0.0003103 | 0.0006958 | 0.0002145 | 6  |
| hsa05165 | 11/82 | 331/8142 | 0.0004475 | 0.0009934 | 0.0003062 | 11 |
| hsa04915 | 7/82  | 138/8142 | 0.0004551 | 0.0010003 | 0.0003083 | 7  |

|          |       |          |           |           |           |    |
|----------|-------|----------|-----------|-----------|-----------|----|
| hsa05321 | 5/82  | 65/8142  | 0.0004715 | 0.0010262 | 0.0003163 | 5  |
| hsa04960 | 4/82  | 37/8142  | 0.0004902 | 0.0010565 | 0.0003256 | 4  |
| hsa00970 | 5/82  | 66/8142  | 0.0005061 | 0.0010804 | 0.000333  | 5  |
| hsa05146 | 6/82  | 102/8142 | 0.000541  | 0.0011439 | 0.0003525 | 6  |
| hsa04920 | 5/82  | 69/8142  | 0.0006217 | 0.001302  | 0.0004013 | 5  |
| hsa04020 | 9/82  | 240/8142 | 0.0006498 | 0.0013482 | 0.0004155 | 9  |
| hsa04520 | 5/82  | 71/8142  | 0.000709  | 0.0014574 | 0.0004492 | 5  |
| hsa00562 | 5/82  | 73/8142  | 0.0008052 | 0.001625  | 0.0005008 | 5  |
| hsa04115 | 5/82  | 73/8142  | 0.0008052 | 0.001625  | 0.0005008 | 5  |
| hsa04150 | 7/82  | 156/8142 | 0.0009456 | 0.0018911 | 0.0005829 | 7  |
| hsa04726 | 6/82  | 115/8142 | 0.0010192 | 0.0020166 | 0.0006215 | 6  |
| hsa05140 | 5/82  | 77/8142  | 0.0010265 | 0.0020166 | 0.0006215 | 5  |
| hsa05206 | 10/82 | 310/8142 | 0.0010398 | 0.0020249 | 0.0006241 | 10 |
| hsa04973 | 4/82  | 47/8142  | 0.0012265 | 0.0023677 | 0.0007297 | 4  |
| hsa04714 | 8/82  | 232/8142 | 0.0022341 | 0.0042757 | 0.0013178 | 8  |
| hsa04923 | 4/82  | 56/8142  | 0.0023584 | 0.0044749 | 0.0013792 | 4  |
| hsa04912 | 5/82  | 93/8142  | 0.0023822 | 0.0044817 | 0.0013813 | 5  |
| hsa05134 | 4/82  | 57/8142  | 0.0025172 | 0.0046959 | 0.0014473 | 4  |
| hsa04371 | 6/82  | 139/8142 | 0.002687  | 0.004971  | 0.0015321 | 6  |
| hsa00591 | 3/82  | 29/8142  | 0.0029788 | 0.0054472 | 0.0016788 | 3  |
| hsa04750 | 5/82  | 98/8142  | 0.0029935 | 0.0054472 | 0.0016788 | 5  |
| hsa04640 | 5/82  | 99/8142  | 0.0031282 | 0.005646  | 0.0017401 | 5  |
| hsa05014 | 10/82 | 364/8142 | 0.0034101 | 0.0061052 | 0.0018817 | 10 |
| hsa05130 | 7/82  | 197/8142 | 0.003584  | 0.0063652 | 0.0019618 | 7  |
| hsa05012 | 8/82  | 266/8142 | 0.0051481 | 0.0090705 | 0.0027956 | 8  |
| hsa05120 | 4/82  | 70/8142  | 0.0052941 | 0.0092542 | 0.0028522 | 4  |
| hsa00982 | 4/82  | 72/8142  | 0.0058509 | 0.0101476 | 0.0031275 | 4  |
| hsa04810 | 7/82  | 218/8142 | 0.0062183 | 0.0107013 | 0.0032982 | 7  |
| hsa04024 | 7/82  | 221/8142 | 0.006689  | 0.0114227 | 0.0035205 | 7  |
| hsa04152 | 5/82  | 120/8142 | 0.0070767 | 0.0119925 | 0.0036961 | 5  |
| hsa05100 | 4/82  | 77/8142  | 0.0074106 | 0.0124632 | 0.0038412 | 4  |
| hsa04110 | 5/82  | 126/8142 | 0.0086552 | 0.0144471 | 0.0044526 | 5  |
| hsa04360 | 6/82  | 182/8142 | 0.0098827 | 0.0163728 | 0.0050461 | 6  |
| hsa04114 | 5/82  | 131/8142 | 0.0101452 | 0.0166833 | 0.0051418 | 5  |
| hsa05168 | 11/82 | 495/8142 | 0.0103899 | 0.0169137 | 0.0052129 | 11 |
| hsa04610 | 4/82  | 85/8142  | 0.0104377 | 0.0169137 | 0.0052129 | 4  |
| hsa00190 | 5/82  | 134/8142 | 0.0111193 | 0.0178875 | 0.005513  | 5  |
| hsa04260 | 4/82  | 87/8142  | 0.0113027 | 0.0180518 | 0.0055636 | 4  |
| hsa05016 | 8/82  | 306/8142 | 0.0115928 | 0.0183829 | 0.0056657 | 8  |
| hsa04540 | 4/82  | 88/8142  | 0.011752  | 0.0185032 | 0.0057027 | 4  |
| hsa05202 | 6/82  | 193/8142 | 0.0129456 | 0.0202388 | 0.0062377 | 6  |
| hsa04936 | 5/82  | 142/8142 | 0.0140256 | 0.021774  | 0.0067108 | 5  |
| hsa05323 | 4/82  | 93/8142  | 0.0141708 | 0.0218466 | 0.0067332 | 4  |
| hsa04070 | 4/82  | 97/8142  | 0.016318  | 0.0249835 | 0.0077    | 4  |
| hsa04061 | 4/82  | 100/8142 | 0.0180558 | 0.0274547 | 0.0084616 | 4  |
| hsa04921 | 5/82  | 154/8142 | 0.0192835 | 0.0291221 | 0.0089755 | 5  |
| hsa04928 | 4/82  | 106/8142 | 0.0218674 | 0.0328011 | 0.0101094 | 4  |
| hsa00590 | 3/82  | 61/8142  | 0.023316  | 0.0347393 | 0.0107067 | 3  |
| hsa04623 | 3/82  | 63/8142  | 0.0253626 | 0.0375366 | 0.0115689 | 3  |
| hsa04022 | 5/82  | 167/8142 | 0.0262921 | 0.0386546 | 0.0119135 | 5  |
| hsa04670 | 4/82  | 114/8142 | 0.0276656 | 0.0404064 | 0.0124534 | 4  |

|          |      |         |           |           |           |   |
|----------|------|---------|-----------|-----------|-----------|---|
| hsa05204 | 3/82 | 69/8142 | 0.0320649 | 0.0465256 | 0.0143393 | 3 |
| hsa04622 | 3/82 | 70/8142 | 0.0332636 | 0.0479514 | 0.0147788 | 3 |
