# Supplementary material for: Identifying and Targeting Prediction of the PI3K-AKT Signaling Pathway in Drug-Induced Thrombocytopenia in Infected Patients Receiving Linezolid Therapy: A Network Pharmacology-Based Analysis
Source: Hindawi journal article supplement (doi:10.1155/2022/2282351), 2022-10-15
Supplement: f1 [file 2282351.f1.zip]

MPL  
GATA1  
WAS  
ANKRD26  
THPO  
RUNX1  
ITGB3  
ETV6  
MYH9  
GP1BA  
ITGA2B  
RBM8A  
GP1BB  
HOXA11  
MECOM  
CYCS  
ADAMTS13  
MASTL  
FLI1  
VWF  
SLFN14  
TCPT  
ITGA2  
SRC  
FYB1  
LIX1L-AS1  
GFI1B  
NBEAL2  
GBA  
IKZF5  
ACTN1  
WDR1  
DIAPH1  
GP9  
THBD  
MPIG6B  
PF4  
LOC106627981  
TPP2  
SEPT5-GP1BB  
FCGR2A  
F3  
CFH  
DGKE

WIPF1  
CD46  
FOXP3  
JAK2  
IL10  
CD109  
IL11  
C3  
FAS  
FLT3  
TUBB1  
TERT  
STAT3  
CFI  
SOCS1  
CTLA4  
NPM1  
FCGR2C  
KRAS  
ARPC1B  
FASLG  
F2  
F11  
CD40LG  
SELP  
CASP10  
KIT  
P2RY12  
STIM1  
SAMD9L  
SMAD4  
SBDS  
GP6  
FCGR2B  
TNFRSF13B  
CFHR1  
CHEK2  
CFHR3  
IL3  
KCNE2  
SALL4  
CDC42  
SERPINC1  
CD36

CD19  
MED12L  
CSF3  
GATA2  
HLA-DRB1  
CFHR5  
TFRC  
STAT1  
IL6  
RNASEH2B  
MMACHC  
TNF  
IFIH1  
TERC  
ERCC6L2  
ZFPM1  
F10  
PTPN11  
ITK  
ACBD5  
SAMHD1  
APOE  
LRBA  
TNFRSF13C  
RNASEH2A  
FLNA  
ETS1  
CFB  
GNE  
MIR155  
CD4  
F5  
TP53  
ABCG5  
RNASEH2C  
NOP10  
IFNA2  
FCGR3A  
PRKCD  
STAT2  
CSF2  
SMPD1  
STXBP2  
APOH

PRKACG  
ABCG8  
TET2  
GP5  
IFNG  
CBFB  
TNFSF13B  
RASGRP1  
CTC1  
PLAT  
PDGFRA  
RPS19  
JBS  
TREX1  
CD209  
ADAR  
IL2  
PRF1  
ACP5  
CFHR4  
EPO  
EFCAB13-DT  
COL4A5  
HP  
ADA  
IFNA1  
HLA-DRB3  
ACTB  
CXCL8  
CD34  
F8  
ALB  
TNFAIP3  
CR2  
CALR  
IL18  
LYST  
KMT2A  
NFKB2  
DNMT3A  
TINF2  
CD79A  
ICAM1  
CD81

PTPN22  
EFL1  
DKC1  
MS4A1  
HLA-B  
SYK  
CEBPA  
CCR6  
KITLG  
NRAS  
BAAT  
LIG4  
IL1B  
PAX5  
NFKB1  
TGFB1  
MYSM1  
ICOSLG  
TLR4  
USP18  
ATM  
BCR  
MAPK1  
NBN  
ZAP70  
CBL  
RPL35A  
PSMB4  
PECAM1  
SAMD9  
ATRIP  
RASGRP2  
PTPRJ  
BRAF  
SERPINE1  
CD8A  
ENG  
G6PC3  
IL17A  
MTHFR  
RTEL1  
ORAI1  
RHD  
CCL2

PPBP  
ITGAM  
PDCD1  
ATRIP-TREX1  
DNAJC21  
NHP2  
CXCL12  
FGA  
ABCB1  
GJB2  
IL1A  
FCGR1A  
BLK  
ANXA5  
OSTM1  
HLA-A  
RFXANK  
IL4  
ZNF85  
ICOS  
TNFSF12  
NUP214  
IL7R  
STN1  
FANCA  
MBL2  
CXCL10  
STAT5B  
MIR223  
U2AF1  
C1GALT1C1  
THBS1  
MYH7  
CRP  
IL1RN  
TLR2  
CRKL  
FYN  
FANCC  
F2R  
PICALM  
MLLT10  
PSMB9  
ITGAL

GPT  
PNP  
F7  
CASP3  
FANCD2  
ACP1  
CIITA  
FANCF  
ALG8  
RAG2  
WFS1  
SELL  
SRP54  
CHIC2  
PLG  
SLX4  
FANCB  
MIR126  
GATA3  
MIR15A  
IL7  
BRCA2  
APBB1  
HAVCR2  
SLC17A5  
F9  
SPATA5  
IFNB1  
LYN  
PCCA  
BRCA1  
SELE  
MAP2K1  
FANCG  
KLF1  
CD47  
FIP1L1  
AZU1  
TBX1  
ACVRL1  
FANCE  
TLR7  
TALDO1  
SETBP1

LPP  
SH3GL1  
IFNG-AS1  
BTK  
IGHG1  
TLR9  
MAP2K2  
LUC7L2  
TOP1  
TBX5  
ERBB2  
COMT  
MAGT1  
CPB2  
PTEN  
MRTFA  
SPARC  
RAD51  
IL17F  
ABCG2  
VPS11  
KARS1  
MIR203A  
ATPLS  
CSF3R  
CD40  
AP1B1  
ITPA  
CDK4  
LTA  
AP3B1  
GALC  
PARN  
OCLN  
PLCG2  
LCK  
MIR146A  
ASXL1  
KIF15  
CD274  
JMJD1C  
PCCB  
PROS1  
ARHGEF1



MGMT  
NLRP3  
IRF4  
PML  
MCFD2  
MIR210  
BRIP1  
EPOR  
DYNC2LI1  
PIK3C2A  
MMP9  
ANGPT2  
ANGPT1  
TRIM21  
ZBTB16  
INSL6  
RARA  
MAD2L2  
UBE2T  
NFE2  
LAT  
SRP72  
MVK  
SEC24C  
HIRA  
RREB1  
CDC40  
ARVCF  
UFD1  
SIRT1  
BCL2  
CD44  
LOC117038795  
HCK  
MIR106B  
MIR181A2  
KMT2D  
FANCL  
ARID5B  
TCIRG1  
IRF2BP2  
DHFR  
RTEL1-TNFRSF6B  
UQCRFS1

FARS2  
SCARF2  
RSPH14  
FANCI  
FANCM  
HAX1  
RAD51C  
FGR  
PFAS  
STX11  
MIRLET7C  
WRAP53  
GZMB  
IL6ST  
DNMT3B  
SPP1  
GPR89A  
GPR89B  
ZNF627  
JAK3  
RPL5  
FWS  
SLC35A1  
USB1  
GNAZ  
EIF4A3  
TBX6  
UPF2  
POLR3C  
UPF3A  
CARHSP1  
RAB36  
C16orf72  
LINC01699  
TBL1XR1  
HPSE  
TNFRSF1A  
HRAS  
EDN1  
SH2B3  
TPMT  
CCND1  
RAG1  
SRP19

SRPRA  
MIR16-1  
DEL22Q11.2  
TBX21  
CD86  
PIGA  
AANAT  
ASMT  
HIF1A  
TNFRSF8  
TBXAS1  
HPS5  
PSMB8  
GNA14  
VPS45  
HBG1  
IL9  
RPS14  
C4B  
RBSN  
MIR34A  
MIR19A  
AOPEP  
FANCD2OS  
LOC107303338  
BDPLT9  
SCARB2  
KDM6A  
PALB2  
SLC46A1  
POU2F3  
ALOX12  
FMN1  
MTOR  
PDGFRB  
NPC1  
HBB  
ERCC4  
XRCC2  
RFWD3  
ELANE  
HBG2  
FCGRT  
NIPBL

UNC13D  
VRK2  
CRBN  
RPL15  
FGG  
TECTA  
PRKAR1A  
LARS2  
NUMA1  
BCOR  
NABP1  
HELLPAR  
BCHE  
PTPRC  
LOC107980440  
DPYD  
COL5A1  
PIK3CD  
SH2D1A  
MYH11  
TET2-AS1  
RPL11  
PSAP  
XIAP  
MYH14  
MYO7A  
LIPA  
ABL1  
GIMAP5  
TTC7A  
MIRLET7D  
MIRLET7A3  
FCGR3B  
SOS1  
LOC107963955  
DGUOK  
RPS10  
RPS24  
RFX5  
RFXAP  
TPM4  
CLCN7  
MYD88  
TCN2

FLT1  
AGGF1  
SLC35D3  
SIRPA  
SRSF2  
MIR25  
SMARCAL1  
PDGFB  
COL4A4  
ABCA1  
C4A  
NOTCH1  
RPS20  
IRAK1  
TYK2  
SARM1  
PIGM  
PIGW  
HSCB  
MAL  
ZNF276  
ZNFX1  
MIR143  
MIR29A  
MIR93  
GIMAP1-GIMAP5  
LARS2-AS1  
LOC112486223  
LOC112486220  
MYO15A  
BCL6  
MMUT  
CR1  
CASP8  
LOC107133510  
MIR17  
MYO3A  
DIAPH3  
TRIOBP  
ESPN  
PTPRQ  
ACTRT2  
PLPPR5  
RECK

TUBB  
CYP2C19  
PLAU  
IKZF1  
IL2RA  
VEGFA  
DDX41  
AGK  
NHEJ1  
CD52  
MIR21  
LOC106099062  
DCLRE1C  
NOS3  
NLRC4  
LMBRD1  
LRRC56  
MMAB  
MMAA  
RYR1  
SLC19A2  
RRAS2  
MSH3  
ASAH1  
NEU1  
ALDH2  
RPS17  
RPL26  
RPS26  
RPS29  
LZTR1  
RELA  
TNFSF11  
ADA2  
COL5A2  
GNB1  
ERBB3  
STAT4  
SF3B1  
MIR152  
DOCK6  
RPS28  
IDH2  
IDH1

RMND5B  
LOC110806306  
RAF1  
EGF  
ALG2  
CD28  
RMRP  
GYPA  
IRF5  
F13A1  
LBR  
BLOC1S6  
RPS27  
RPL31  
ARHGAP31  
EOGT  
TSR2  
RPS15  
MIR424  
HLCS  
ALG12  
ACD  
ABCD4  
PLEK  
C5  
CD55  
AKT1  
NOS2  
MIR27A  
MT-CO1  
DIPK1A  
PEE1  
COG1  
CSF1  
S100A8  
TRPM7  
CDKN2B  
CXCR4  
MIR221  
CHD7  
HDAC9  
ATRX  
IVD  
DNASE1

P2RX7  
POT1  
RAD21  
HYOU1  
MADD  
SMARCD2  
MIR181A1HG  
ALL1  
ALL2  
MIR23A  
OCRL  
PEPD  
ANKRD11  
MIR20A  
PRDX1  
BRD4  
MMRN1  
IRF7  
SPN  
TNIP1  
DOCK8  
CDK2  
SERPINF2  
TYMS  
NSD1  
CDKN1A  
TWNK  
MIR181A1  
MYC  
MLLT3  
H2AC18  
BCL2L1  
B4GALT1  
ADAMTSL1  
SPRY2  
JAK1  
CTNNB1  
TGM1  
XRCC4  
LOC110806263  
BAX  
CDK6  
TNFSF13  
MYB



ATP7B  
ITGB2  
TNFSF10  
NUDT15  
CA2  
STT3B  
COG4  
RAB27A  
MPO  
MIR195  
CTTN  
IKZF3  
RBM15  
TRB  
APOA1  
YME1L1  
FGFR3  
HCFC1  
CDKN3  
RIT1  
SHOC2  
LOC110006319  
RB1  
CUBN  
CD70  
GRB2  
IDO1  
MIR23B  
MIR150  
JUN  
MIR145  
CDK1  
SNX10  
VPS33A  
BTNL2  
TMEM165  
COG6  
ESCO2  
PKHD1  
HDAC8  
CHIT1  
VAV1  
HPS6  
MYH10

PLCG1  
IGF2R  
SP140  
MIR181B1  
DDX58  
SLC4A1  
CFHR2  
DEK  
NR3C1  
SLC25A4  
MRAS  
PPP1CB  
SOS2  
RRAS  
SPRED2  
A2ML1  
RASA2  
TKFC  
DENND11  
RPS10-NUDT3  
LOC107303343  
CD9  
XDH  
MIR222  
MIR22  
MIR18A  
HLA-DRA  
WT1  
SLC7A7  
UROS  
HBB-LCR  
IGHE  
HPS3  
MIR204  
MIR320A  
MIR107  
FHL1  
TGFB3  
IL18R1  
MET  
PSTPIP1  
DCK  
CDKN1B  
DLL4

UBA1  
AMN  
SNCA  
THYN1  
NKX2-5  
MIR142  
PMM2  
CCL5  
PIK3CA  
PIK3R1  
WASL  
UBASH3B  
G6PD  
CARD14  
IGKC  
C2  
GGT1  
MSN  
IL12A  
VCAM1  
COL1A1  
COL1A2  
GSTP1  
FCN2  
TBK1  
TRIP10  
CD59  
UGT1A1  
RAC1  
GFI1  
ARFRP1  
EGFR  
ZAN  
WASF2  
IL2RG  
CDAN1  
IGHG3  
FN1  
PKD1  
PLEKHM1  
B2M  
PHGDH  
ADH5  
RBPJ

SLC20A2  
RPL35  
CORIN  
RPL18  
WARS2  
NSUN2  
ACAD9  
MOGS  
RPS15A  
ATP6AP1  
RPL27  
PPIL1  
XPR1  
JAM2  
POMP  
RPS7  
SARS2  
SP110  
STOX1  
SC5D  
OTUD5  
GUCY1A1  
DZIP1L  
MYORG  
IL21  
IFNAR1  
PPARG  
TRAF6  
RETN  
FGFR1  
PRODH  
EIF1B  
WASF1  
SDC1  
GGCX  
VPS33B  
AP3D1  
TEK  
APC  
TNFRSF11A  
ERF  
MIR196A2  
MIR127  
MIR181C

JAM3  
MIR99A  
TNXA  
HAVCR1  
STAT5A  
MIRLET7B  
TRA  
TNFRSF17  
LMO2  
TSC2  
TWIST1  
PKD2  
MAN2B1  
NAGLU  
SLC37A4  
COG7  
ACKR1  
AP4E1  
CCDC115  
CA3-AS1  
TBXA2R  
SMAD6  
DOCK2  
CENPF  
ALOX12B  
TGM6  
ARL11  
CEP72  
TMEM107  
C11orf65  
MIR34B  
MIR32  
SNORD118  
IGHV4-34  
DPYD-AS1  
IGHV3-21  
TAM  
DEL1Q21  
CLLS2  
CLLS3  
CLLS4  
CLLS5  
CLLS1  
MALAT1

CXCR3  
NCAM1  
BCL2L11  
MYH2  
ZIC3  
TBX20  
AFF2  
NCK1  
LCP2  
ACTR2  
ACTR3  
BAIAP2  
SNX9  
WASF3  
NCKIPSD  
RHOD  
WHAMM  
WASHC1  
WASH3P  
WASH6P  
WASF4P  
WASF5P  
BMI1  
IRF3  
IL15  
CD33  
RUNX3  
HOXA10  
GAS5  
SHANK3  
GALE  
BMP6  
NFE2L2  
HSPD1  
IL16  
AICDA  
CABIN1  
PROC  
PVT1  
MIR130A  
CD27  
AKT3  
HNRNPU  
RHCE

ZBTB18  
COX20  
HEPACAM  
VTN  
FMO5  
ACP6  
OPRL1  
SALL1  
SALL2  
GATAD2A  
SALL3  
ATF5  
RTP1  
RTP2  
COL4A3  
CCNC  
SNAP29  
SEPTIN5  
SLC45A2  
IDS  
NBEA  
LPA  
HTR2A  
ACHE  
IL23R  
CLU  
PTX3  
CD7  
MIR182  
CD247  
KNG1  
C1S  
SERPING1  
AIRE  
CCL3  
TIMP1  
CD2  
PARP1  
CX3CR1  
CD5  
SQSTM1  
KIRREL3  
OPCML  
NTM

NFRKB  
DSCAML1  
FEZ1  
NRGN  
ARHGAP32  
SNX19  
FRA10AC1  
BARX2  
MED9  
BSX  
TMEM185A  
FRA11B  
NOTCH3  
ITGAV  
DDRKG1  
SEC23B  
YES1  
FRK  
GPR65  
IGHG2  
IGHG4  
IGKV@  
IGLV@  
IGKJ  
IGLJ  
CREBBP  
BLOC1S1  
MT-CYB  
FZD6  
TSC1  
LIFR  
AXIN1  
ABCC9  
SGSH  
CISH  
MECP2  
SERPINF1  
UBE2L3  
GYPC  
TIRAP  
PDGFRL  
CREB3L1  
GLMN  
P3H1



TNFSF4  
TAF6  
DEF6  
SLC39A7  
HGSNAT  
JAZF1  
DYNC2H1  
PXK  
GYPB  
MTUS1  
RINT1  
BANK1  
KIAA0319L  
TMEM199  
C6orf89  
CPLANE1  
MIR191  
MIR10A  
MIR122  
CFAP92  
MIR200B  
MIR24-2  
MIR181B2  
MIR224  
DGUOK-AS1  
MTOR-AS1  
MFF-DT  
APOA1-AS  
SLEB3  
EOS  
SLEB4  
DBA2  
KAZA1  
PEE2  
PEE3  
SLEB12  
SLEB13  
SLEB14  
SLEB15  
SLEB5  
SLEB7  
SLEB8  
SS3  
CFSS

MDM2  
MMP2  
C5AR1  
CSF1R  
LPL  
CD63  
NFKBIA  
PGF  
IL22  
IL2RB  
CASP9  
KLRK1  
CFD  
AR  
ERCC6  
CD38  
NQO1  
ERVW-1  
CDA  
CD163  
FLT3LG  
CYP3A4  
KIF23  
CDIN1  
MAPK8  
TNFRSF10A  
SLFN13  
SLFN12L  
SLFN12  
RAP1B  
SLC22A1  
HLA-DRB4  
CD72  
MIR183  
IL33  
C1R  
FCN3  
INF2  
ABCC1  
GGH  
IL13  
HLA-DQB1  
CCL4  
TLR5

PTPRN  
PTPRN2  
INSM1  
INSM2  
IL27  
PTGS2  
MIR146B  
IL5  
HGF  
CASP1  
EBI3  
CD69  
ITGAE  
YARS1  
TLR3  
IL1R1  
MCL1  
TCF3  
KLKB1  
FGB  
HRG  
PROZ  
PCID2  
LOC101448202  
HRG-AS1  
LOC107126281  
LOC119407405  
MYH7B  
UBR3  
WRN  
TCOF1  
CCR5  
MEFV  
FGF2  
FOS  
APOB  
SULT1A3  
HSP90AA1  
TKT  
GSTM1  
KDR  
IFNAR2  
INHA  
MASP1

MASP2  
AP2M1  
COLEC11  
CFP  
C3AR1  
RAPGEF1  
FCN1  
C5AR2  
RBMS1  
MYBPH  
AGBL2  
AGBL1  
RBMS2  
VSIG4  
AGBL3  
AGBL4  
MVB12A  
MIR125A  
GZMA  
TFAP2A  
CPA3  
NLRP12  
SIGLEC5  
IGHV4-38-2  
PTPN6  
LIF  
HMGB1  
TNFRSF4  
EZH2  
UGCG  
ISG15  
TERF1  
HPRT1  
AQP1  
RBL2  
SBF2  
RETNLB  
LCAT  
PTGS1  
SLC19A1  
BIRC5  
KIR3DL1  
VNN1  
LPIN2

CYP19A1  
IL11RA  
KDSR  
ANPEP  
TAL1  
MTR  
IVNS1ABP  
ENTPD1  
KDM4C  
HLA-DQA1  
MX1  
SETD2  
CD22  
ITGAX  
CFLAR  
DNTT  
STIM2  
ORAI2  
SYPL2  
ORAI3  
MIR196A1  
GUSB  
CMA1  
IRF8  
IL10RA  
PRDM1  
TCN1  
KMT2E  
RPL38  
CCL18  
PLBD2  
NEAT1  
CCND3  
INS  
RAPGEF3  
IRF9  
RHBDF2  
KMT2B  
CCR3  
ERCC1  
ARSA  
IRF1  
PPARA  
NPC2

FCRL6  
ENPP1  
NRP1  
HSPH1  
IGSF3  
IFRD1  
ABO  
ANXA2  
HADHA  
SCARB1  
TXN  
MIR185  
IGF1  
IFNL3  
XK  
ADAMTS16  
NDFIP2  
IRX1  
ZNF84  
LINC01080  
ENSG00000284196  
piR-39300-045  
piR-31199-095  
IL23A  
DNMT1  
PIK3CG  
MMADHC  
LEF1  
MYCN  
APAF1  
PROM1  
ASPH  
MEIS1  
PUS1  
NUP107  
CLDN5  
PRAME  
SLC25A38  
MIR128-2  
MIRLET7E  
MIR9-1  
MIR199A1  
ACE  
ITGB1

XRCC1  
LEPR  
EP300  
RIPK1  
POLG  
RNASET2  
MBP  
FCER2  
CD80  
EIF6  
MT-ND3  
UTP4  
MIR15B  
MT-TF  
KIR2DS2  
PTTG1  
WAC  
LSM14A  
MIR409  
ERCC2  
IGF1R  
FADD  
BIRC3  
AURKB  
IL12B  
OSM  
MAPK3  
ADIPOQ  
CCR7  
LAMP1  
RSAD2  
RPL6  
FPGS  
VDR  
LAIR1  
CXCL16  
CP  
CYP2C9  
HFE  
SERPINA3  
CD177  
SMARCA4  
NOD2  
IL37

HDAC1  
IFI27  
CYP2D6  
IDUA  
TREML1  
SMC3  
MSH2  
ARF1  
FOXP2  
CDC45  
TNFRSF9  
RECQL4  
MPV17  
TNFRSF18  
USH1C  
RPS16  
CXCR5  
RPS25  
MT-ATP6  
MIR30E  
CDKN2B-AS1  
MIR130B  
CHEK1  
LCN2  
ATR  
CTSD  
NF1  
GATA4  
COL2A1  
CREB1  
PLK1  
GLA  
SPTAN1  
FGF8  
TP53BP1  
DDX11  
BGLAP  
VTI1B  
EMG1  
STAP1  
PNPLA5  
CPLX3  
DCLRE1B  
MEG3



SLC66A1  
TLDC2  
HOTAIR  
MIR125B1  
CCND2  
ITPR3  
CASQ1  
RTN4R  
ERP44  
NUP133  
ESYT1  
MICU2  
JSRP1  
TMCC1  
EGR4  
TMEM178A  
SARAF  
CRACR2A  
STIMATE  
MIR151A  
TNFRSF1B  
XRCC6  
XRCC5  
DNASE1L3  
IL21R  
MRE11  
TERF2  
HLA-C  
GSR  
ABCC2  
AFP  
MYO18A  
SMC1A  
SIRT2  
SIRT3  
G3BP1  
LOC102724971  
TNFRSF6B  
IFIT3  
SST  
CST3  
PRKDC  
IL6R  
ASS1

SLC19A3  
IL12RB1  
HAMP  
PLAUR  
RAD17  
MDC1  
URB2  
H19  
MME  
ABCC3  
ZRSR2  
TALDO1P1  
IGH  
TNFRSF10B  
DRD2  
MUC1  
RXRA  
SCN8A  
ALOX5  
CYP1A1  
LEP  
CDKN1C  
KAT5  
SMARCB1  
PKLR  
POLR1D  
RNASEL  
CCNA2  
EXO1  
NUP98  
CEBPB  
LDLRAP1  
MTMR3  
PLD3  
MSH5  
ASAH2  
CHD8  
RPL3  
MRC1  
CCL19  
BHLHE40  
PLA2R1  
ID4  
RPL29

PLD4  
RSL24D1  
PIF1  
LGALS13  
KCTD13  
DGKK  
PLD5  
HORMAD2  
MBOAT2  
NMD3  
CLEC5A  
NPB  
TENT4A  
TUG1  
XIST  
UCA1  
DGCR5  
MIR30A  
MIR134  
MIR486-1  
TF  
CDKN2A  
ITGA5  
RRM2B  
CD79B  
ACTA2  
NCOR2  
PTPN3  
ALAS2  
BCS1L  
FOLR2  
FAF1  
RIPK3  
TRIP11  
DTNBP1  
THY1  
YARS2  
ARFGAP1  
MLKL  
MVP  
SFXN4  
ARFGAP3  
GLRX5  
PVALB

NUP160  
NUP85  
TRMU  
VPREB1  
HOXA9  
ANKRD49  
PIR  
RAB3IL1  
AHCTF1  
ARFGAP2  
MT-ND4  
MT-CO2  
MGME1  
MT-ND6  
MT-CO3  
CCDC12  
MIR140  
MIR199B  
MIR451A  
MT-TL1  
MT-TH  
MT-TK  
MT-TG  
PDPN  
IFNGR1  
VIM  
OTC  
ELN  
MCEE  
ARID2  
MPEG1  
CNR2  
SOCS3  
MTRR  
TYMP  
SLCO1B3  
MAPK14  
RAD50  
GAPDH  
SERPINA1  
COL4A1  
BLM  
PON1  
HSPA5

TUBG1  
ADSL  
HLA-DPB1  
HNF1A  
ETFA  
ACADVL  
CTSG  
RPA1  
M6PR  
RNF168  
IFI16  
FBL  
RPS13  
AIM2  
IFITM3  
PIGB  
HUS1  
GP2  
IFITM1  
PIGT  
GTPBP1  
GAR1  
FCGBP  
H2AX  
MARVELD3  
NAT16  
KLK3  
MIF  
ABCC4  
DPP4  
ACADS  
ALK  
MAVS  
IGHM  
VIPR1  
MBTPS2  
IL3RA  
MAGOH  
RAC2  
NOTCH2  
SLC6A3  
NRXN1  
PI4KA  
NRG1

BARD1  
SLC25A1  
TXNRD2  
GJA5  
TP73  
CHRNA7  
BLNK  
NCOR1  
FOXP1  
HLA-G  
TUBA8  
ANK3  
DISC1  
FMR1  
FHIT  
KMT2C  
KAT6A  
RANBP1  
SPI1  
AP2S1  
P2RX6  
SUZ12  
CLTCL1  
DGCR8  
GCM2  
HMGN1  
HOXA7  
NLGN4X  
CD58  
TOP3B  
DGCR2  
BBC3  
CYFIP1  
MED15  
CD68  
RUNX1T1  
SF3B2  
TRMT2A  
SPECC1L  
ZDHHC8  
KLHL22  
KIR2DL3  
NIP7  
FOXE3

MRPL40  
PHF21B  
PSMA8  
STK32C  
DHX29  
AIFM3  
ZNF74  
FUT4  
GNB1L  
MRPS18A  
RARS1  
BAALC  
AHDC1  
PPP1R18  
ZNF804A  
MZB1  
TANGO2  
CD24  
PRAM1  
PRDM4  
MRT04  
RPF1  
THAP7  
LSG1  
DGCR6  
DGCR6L  
GLIPR1L2  
ANKRD37  
VWA7  
WBP1L  
RABL2B  
DYNLT2B  
CNPY1  
FOXI3  
H2AC16  
H2AC17  
C22orf15  
OR2T12  
PLPPR1  
MBD3L3  
MIR26B  
RIMBP3B  
MIR149  
MIR342

HOTAIRM1  
LRRC74B  
MIR483  
MIR193A  
MIR574  
MIR423  
MIR30D  
MIR1306  
MIR376A1  
MIR374A  
CCAT1  
MIR147A  
RNASEH2B-AS1  
FAM230B  
ADAM10  
KEAP1  
SEMA4D  
RORC  
BAD  
CARD9  
MBD4  
IL18BP  
MBD2  
IFNL2  
IFNL1  
KIR2DL2  
KIR2DS5  
THRIL  
MIR148A  
CDH1  
AURKA  
SET  
EGR1  
FSCN1  
CD1A  
FAAP100  
FURIN  
AXL  
MSH6  
RARB  
PTCH1  
TNFRSF11B  
CASP7  
LMNA



LRRK2  
SLC12A6  
FES  
ABCB4  
TLR8  
CPS1  
HEXA  
PTK2  
CARD11  
PC  
VKORC1  
NPPA  
HERC2  
ABCA4  
SGPL1  
DAG1  
B4GALNT1  
ACADSB  
ADM  
RPSA  
UGT8  
CSF2RA  
DKK1  
ASPA  
B3GAT1  
CYP26A1  
MBTPS1  
ARAF  
LAMP2  
NLRP1  
BGN  
RPA2  
NOP56  
GDF15  
CORO1A  
GM2A  
INPP4A  
MUS81  
CCL11  
CXCR1  
BCKDHB  
ATP13A2  
RNASEH1  
PABPC1

PHF8  
NAGS  
FLVCR1  
MSLN  
RPS27A  
UBA7  
CBX4  
AP4B1  
ID1  
PROCR  
TSG101  
GBA2  
OAS3  
RNASE3  
AZIN1  
MARVELD2  
PUS7  
PAPPA2  
CD83  
SLAMF1  
HLTF  
CD99  
POLM  
UNC93B1  
RCHY1  
PIGL  
DNASE2  
LARP1  
UGT3A1  
BST2  
MAGEA1  
PRKN  
DLX1  
FAN1  
HELQ  
GULP1  
IFITM2  
TRUB1  
SYT6  
SRA1  
MAGEA3  
MAGEA4  
RASIP1  
CDCA5

PDS5B  
SPCS1  
SPRTN  
DPH7  
PIGY  
ACTRT3  
SHQ1  
TRUB2  
CREG2  
PCP2  
CTAG1B  
IGSF5  
URB1  
XKR7  
FAAP24  
WT1-AS  
MIR33A  
MIR214  
MIR615  
MIR324  
HOXA-AS2  
H3-7  
SNORA67  
MIR500A  
SCARNA23  
FAM223A  
MIR1288  
MT-TN  
MT-TS2  
MT-TM  
MT-TD  
LOC110806264  
LOC122056785  
HSPA4  
SON  
PRKCQ  
PLA2G7  
MAD2L1  
DYSF  
TIMP2  
SYNE1  
ITGA4  
PTHLH  
BIRC2

MIR335  
FLT4  
RHOA  
EFTUD2  
CXCL13  
CXCL9  
SLC35C1  
MALT1  
CRLF2  
TENT5A  
IFNGR2  
SOD1  
ACE2  
HSPG2  
TYRO3  
GJB6  
BCL2L2  
HLA-S  
NLRP6  
BMS1P20  
IL4R  
NR1I2  
ADH1B  
F12  
SLC29A1  
LILRA3  
ST3GAL4  
KLF12  
SNX11  
MIR557  
NEWENTRY  
ASPG  
ELOVL4  
TPO  
C1QA  
TRIM25  
STAG2  
CHRNE  
CLTA  
IFNA13  
PAEP  
NAAA  
MTX1  
CAT

PRB2  
COX8A  
FLII  
FGF4  
SLURP1  
KRT20  
BTG3  
RIEG2  
CDC20  
C20orf181  
SH2B2  
MT1E  
GBAP1  
MXI1  
DCPS  
FUNDC2  
GGTLC5P  
DERL1  
PRDX2  
SOAT1  
SLC25A10  
CYLD  
CYP2C8  
RO60  
MFT2  
PWAR1  
OR2AG1  
DDX53  
SRF  
GSC  
CSN1S1  
SESTD1  
SLCO1B1  
PRSS27  
SLC28A1  
RN7SL263P  
GGTLC1  
RNF34  
LOC102724197  
APBB3  
S1PR4  
MYL9  
CHRD  
CEACAM5

BCL10  
SPZ1  
LINC01152  
GGTLC4P  
GGT2  
GGTLC3  
GTF2IRD1  
HSP90B1  
CRISP2  
PRDX6  
LINC-ROR  
ECT  
TGS1  
NCR1  
XPO1  
CIT  
SLC52A2  
DDIT3  
WDHD1  
CACNB3  
ZFP36  
PADI4  
MTHFD1  
MSR1  
MPI  
ASGR1  
GEM  
SMCP  
MCC  
CBLIF  
NOS1  
SH3BP4  
CLEC1B  
IL4I1  
DUOX2  
C20orf194  
PRPF31  
GAS6  
ACAD8  
CXCL1  
CXCL2  
GTF2I  
HTC2  
HMOX1

HLA-DQB2  
HLA-DPA1  
BTBD8  
DNM2  
PVR  
STX2  
WDR18  
C1GALT1  
SPHK2  
PRSS55  
MMS19  
ATN1  
XYLT2  
TNMD  
SCT  
E2F1  
EFNA5  
RRM1  
ELF3  
EMP1  
PNLIP  
DUOX1  
ATP7A  
NT5C2  
KDM1A  
PIK3CB  
FOLH1  
RASA3  
FHL3  
PRKG1  
ZC4H2  
ARHGEF40  
RNPC3  
PTPA  
FBN1  
MOCOS  
FCER1G  
FGFR2  
POU2F1  
RHOF  
TREM1  
TRIM33  
G6B  
IFZF5
