# Supplementary material for: Identifying and Targeting Prediction of the PI3K-AKT Signaling Pathway in Drug-Induced Thrombocytopenia in Infected Patients Receiving Linezolid Therapy: A Network Pharmacology-Based Analysis
Source: Hindawi journal article supplement (doi:10.1155/2022/2282351), 2022-10-15
Supplement: f1 [file 2282351.f1.zip]

|                                           |        |
|-------------------------------------------|--------|
| EGFR tyrosine kinase inhibitor resistance | IL6    |
| EGFR tyrosine kinase inhibitor resistance | STAT3  |
| EGFR tyrosine kinase inhibitor resistance | KDR    |
| EGFR tyrosine kinase inhibitor resistance | PIK3CB |
| EGFR tyrosine kinase inhibitor resistance | MET    |
| EGFR tyrosine kinase inhibitor resistance | RAF1   |
| EGFR tyrosine kinase inhibitor resistance | JAK2   |
| EGFR tyrosine kinase inhibitor resistance | PIK3CD |
| EGFR tyrosine kinase inhibitor resistance | PIK3CA |
| EGFR tyrosine kinase inhibitor resistance | MAPK1  |
| EGFR tyrosine kinase inhibitor resistance | AKT1   |
| EGFR tyrosine kinase inhibitor resistance | ERBB2  |
| EGFR tyrosine kinase inhibitor resistance | EGFR   |
| EGFR tyrosine kinase inhibitor resistance | MTOR   |
| Central carbon metabolism in cancer       | PIK3CB |
| Central carbon metabolism in cancer       | MET    |
| Central carbon metabolism in cancer       | RAF1   |
| Central carbon metabolism in cancer       | PIK3CD |
| Central carbon metabolism in cancer       | PIK3CA |
| Central carbon metabolism in cancer       | MAPK1  |
| Central carbon metabolism in cancer       | AKT1   |
| Central carbon metabolism in cancer       | FGFR1  |
| Central carbon metabolism in cancer       | FLT3   |
| Central carbon metabolism in cancer       | ERBB2  |
| Central carbon metabolism in cancer       | EGFR   |
| Central carbon metabolism in cancer       | MTOR   |
| Central carbon metabolism in cancer       | KIT    |
| Pancreatic cancer                         | STAT3  |
| Pancreatic cancer                         | PIK3CB |
| Pancreatic cancer                         | RAF1   |
| Pancreatic cancer                         | PIK3CD |
| Pancreatic cancer                         | PIK3CA |
| Pancreatic cancer                         | MAPK1  |
| Pancreatic cancer                         | AKT1   |
| Pancreatic cancer                         | ERBB2  |
| Pancreatic cancer                         | EGFR   |
| Pancreatic cancer                         | MTOR   |
| Pancreatic cancer                         | CDK4   |
| Pancreatic cancer                         | MAPK8  |
| Pancreatic cancer                         | RAD51  |
| Lipid and atherosclerosis                 | CYP2C9 |
| Lipid and atherosclerosis                 | IL6    |
| Lipid and atherosclerosis                 | CCL2   |
| Lipid and atherosclerosis                 | NLRP3  |

|                                                        |        |  |
|--------------------------------------------------------|--------|--|
| Lipid and atherosclerosis                              | HSPD1  |  |
| Lipid and atherosclerosis                              | STAT3  |  |
| Lipid and atherosclerosis                              | MAPK14 |  |
| Lipid and atherosclerosis                              | PIK3CB |  |
| Lipid and atherosclerosis                              | JAK2   |  |
| Lipid and atherosclerosis                              | PIK3CD |  |
| Lipid and atherosclerosis                              | PIK3CA |  |
| Lipid and atherosclerosis                              | MAPK1  |  |
| Lipid and atherosclerosis                              | TBK1   |  |
| Lipid and atherosclerosis                              | CASP7  |  |
| Lipid and atherosclerosis                              | AKT1   |  |
| Lipid and atherosclerosis                              | CASP1  |  |
| Lipid and atherosclerosis                              | SELE   |  |
| Lipid and atherosclerosis                              | MAPK8  |  |
| PI3K-Akt signaling pathway                             | IL6    |  |
| PI3K-Akt signaling pathway                             | EPO    |  |
| PI3K-Akt signaling pathway                             | KDR    |  |
| PI3K-Akt signaling pathway                             | PIK3CB |  |
| PI3K-Akt signaling pathway                             | SYK    |  |
| PI3K-Akt signaling pathway                             | MET    |  |
| PI3K-Akt signaling pathway                             | RAF1   |  |
| PI3K-Akt signaling pathway                             | JAK2   |  |
| PI3K-Akt signaling pathway                             | PIK3CD |  |
| PI3K-Akt signaling pathway                             | PIK3CG |  |
| PI3K-Akt signaling pathway                             | PIK3CA |  |
| PI3K-Akt signaling pathway                             | MAPK1  |  |
| PI3K-Akt signaling pathway                             | AKT1   |  |
| PI3K-Akt signaling pathway                             | FLT1   |  |
| PI3K-Akt signaling pathway                             | FGFR1  |  |
| PI3K-Akt signaling pathway                             | FLT3   |  |
| PI3K-Akt signaling pathway                             | CDK2   |  |
| PI3K-Akt signaling pathway                             | ERBB2  |  |
| PI3K-Akt signaling pathway                             | EGFR   |  |
| PI3K-Akt signaling pathway                             | MTOR   |  |
| PI3K-Akt signaling pathway                             | CDK4   |  |
| PI3K-Akt signaling pathway                             | KIT    |  |
| PD-L1 expression and PD-1 checkpoint pathway in cancer | IFNG   |  |
| PD-L1 expression and PD-1 checkpoint pathway in cancer | STAT3  |  |
| PD-L1 expression and PD-1 checkpoint pathway in cancer | MAPK14 |  |
| PD-L1 expression and PD-1 checkpoint pathway in cancer | PIK3CB |  |
| PD-L1 expression and PD-1 checkpoint pathway in cancer | RAF1   |  |
| PD-L1 expression and PD-1 checkpoint pathway in cancer | JAK2   |  |
| PD-L1 expression and PD-1 checkpoint pathway in cancer | PIK3CD |  |
| PD-L1 expression and PD-1 checkpoint pathway in cancer | PIK3CA |  |

|                                                        |        |
|--------------------------------------------------------|--------|
| PD-L1 expression and PD-1 checkpoint pathway in cancer | MAPK1  |
| PD-L1 expression and PD-1 checkpoint pathway in cancer | AKT1   |
| PD-L1 expression and PD-1 checkpoint pathway in cancer | EGFR   |
| PD-L1 expression and PD-1 checkpoint pathway in cancer | MTOR   |
| PD-L1 expression and PD-1 checkpoint pathway in cancer | ZAP70  |
| Endocrine resistance                                   | CYP2D6 |
| Endocrine resistance                                   | MAPK14 |
| Endocrine resistance                                   | PIK3CB |
| Endocrine resistance                                   | RAF1   |
| Endocrine resistance                                   | PIK3CD |
| Endocrine resistance                                   | PIK3CA |
| Endocrine resistance                                   | MAPK1  |
| Endocrine resistance                                   | AKT1   |
| Endocrine resistance                                   | ERBB2  |
| Endocrine resistance                                   | EGFR   |
| Endocrine resistance                                   | MTOR   |
| Endocrine resistance                                   | CDK4   |
| Endocrine resistance                                   | MAPK8  |
| AGE-RAGE signaling pathway in diabetic complications   | IL6    |
| AGE-RAGE signaling pathway in diabetic complications   | CCL2   |
| AGE-RAGE signaling pathway in diabetic complications   | STAT3  |
| AGE-RAGE signaling pathway in diabetic complications   | MAPK14 |
| AGE-RAGE signaling pathway in diabetic complications   | PIK3CB |
| AGE-RAGE signaling pathway in diabetic complications   | JAK2   |
| AGE-RAGE signaling pathway in diabetic complications   | PIK3CD |
| AGE-RAGE signaling pathway in diabetic complications   | PIK3CA |
| AGE-RAGE signaling pathway in diabetic complications   | MAPK1  |
| AGE-RAGE signaling pathway in diabetic complications   | AKT1   |
| AGE-RAGE signaling pathway in diabetic complications   | CDK4   |
| AGE-RAGE signaling pathway in diabetic complications   | SELE   |
| AGE-RAGE signaling pathway in diabetic complications   | MAPK8  |
| C-type lectin receptor signaling pathway               | IL6    |
| C-type lectin receptor signaling pathway               | IL10   |
| C-type lectin receptor signaling pathway               | NLRP3  |
| C-type lectin receptor signaling pathway               | MAPK14 |
| C-type lectin receptor signaling pathway               | PIK3CB |
| C-type lectin receptor signaling pathway               | SYK    |
| C-type lectin receptor signaling pathway               | RAF1   |
| C-type lectin receptor signaling pathway               | PIK3CD |
| C-type lectin receptor signaling pathway               | PIK3CA |
| C-type lectin receptor signaling pathway               | MAPK1  |
| C-type lectin receptor signaling pathway               | AKT1   |
| C-type lectin receptor signaling pathway               | CASP1  |
| C-type lectin receptor signaling pathway               | MAPK8  |

|                                                   |        |         |
|---------------------------------------------------|--------|---------|
| FoxO signaling pathway                            | IL6    |         |
| FoxO signaling pathway                            | IL10   |         |
| FoxO signaling pathway                            | CAT    |         |
| FoxO signaling pathway                            | STAT3  |         |
| FoxO signaling pathway                            | MAPK14 |         |
| FoxO signaling pathway                            | PIK3CB |         |
| FoxO signaling pathway                            | RAF1   |         |
| FoxO signaling pathway                            | PIK3CD |         |
| FoxO signaling pathway                            | PIK3CA |         |
| FoxO signaling pathway                            | MAPK1  |         |
| FoxO signaling pathway                            | AKT1   |         |
| FoxO signaling pathway                            | CDK2   |         |
| FoxO signaling pathway                            | EGFR   |         |
| FoxO signaling pathway                            | MAPK8  |         |
| HIF-1 signaling pathway                           | IL6    |         |
| HIF-1 signaling pathway                           | IFNG   |         |
| HIF-1 signaling pathway                           | EPO    |         |
| HIF-1 signaling pathway                           | STAT3  |         |
| HIF-1 signaling pathway                           | PIK3CB |         |
| HIF-1 signaling pathway                           | PIK3CD |         |
| HIF-1 signaling pathway                           | PIK3CA |         |
| HIF-1 signaling pathway                           | MAPK1  |         |
| HIF-1 signaling pathway                           | AKT1   |         |
| HIF-1 signaling pathway                           | FLT1   |         |
| HIF-1 signaling pathway                           | ERBB2  |         |
| HIF-1 signaling pathway                           | EGFR   |         |
| HIF-1 signaling pathway                           | MTOR   |         |
| Chemical carcinogenesis - reactive oxygen species |        | COX2    |
| Chemical carcinogenesis - reactive oxygen species |        | SLC25A4 |
| Chemical carcinogenesis - reactive oxygen species |        | CAT     |
| Chemical carcinogenesis - reactive oxygen species |        | COX1    |
| Chemical carcinogenesis - reactive oxygen species |        | ND6     |
| Chemical carcinogenesis - reactive oxygen species |        | COX3    |
| Chemical carcinogenesis - reactive oxygen species |        | CYTB    |
| Chemical carcinogenesis - reactive oxygen species |        | MAPK14  |
| Chemical carcinogenesis - reactive oxygen species |        | PIK3CB  |
| Chemical carcinogenesis - reactive oxygen species |        | MET     |
| Chemical carcinogenesis - reactive oxygen species |        | RAF1    |
| Chemical carcinogenesis - reactive oxygen species |        | PIK3CD  |
| Chemical carcinogenesis - reactive oxygen species |        | PIK3CA  |
| Chemical carcinogenesis - reactive oxygen species |        | MAPK1   |
| Chemical carcinogenesis - reactive oxygen species |        | AKT1    |
| Chemical carcinogenesis - reactive oxygen species |        | EGFR    |
| Chemical carcinogenesis - reactive oxygen species |        | MAPK8   |

|                                                 |        |
|-------------------------------------------------|--------|
| Kaposi sarcoma-associated herpesvirus infection | IL6    |
| Kaposi sarcoma-associated herpesvirus infection | STAT3  |
| Kaposi sarcoma-associated herpesvirus infection | MAPK14 |
| Kaposi sarcoma-associated herpesvirus infection | PIK3CB |
| Kaposi sarcoma-associated herpesvirus infection | SYK    |
| Kaposi sarcoma-associated herpesvirus infection | RAF1   |
| Kaposi sarcoma-associated herpesvirus infection | JAK2   |
| Kaposi sarcoma-associated herpesvirus infection | PIK3CD |
| Kaposi sarcoma-associated herpesvirus infection | PIK3CG |
| Kaposi sarcoma-associated herpesvirus infection | PIK3CA |
| Kaposi sarcoma-associated herpesvirus infection | MAPK1  |
| Kaposi sarcoma-associated herpesvirus infection | TBK1   |
| Kaposi sarcoma-associated herpesvirus infection | AKT1   |
| Kaposi sarcoma-associated herpesvirus infection | MTOR   |
| Kaposi sarcoma-associated herpesvirus infection | CDK4   |
| Kaposi sarcoma-associated herpesvirus infection | MAPK8  |
| Yersinia infection                              | IL6    |
| Yersinia infection                              | CCL2   |
| Yersinia infection                              | IL10   |
| Yersinia infection                              | NLRP3  |
| Yersinia infection                              | MAPK14 |
| Yersinia infection                              | PIK3CB |
| Yersinia infection                              | PIK3CD |
| Yersinia infection                              | PIK3CA |
| Yersinia infection                              | MAPK1  |
| Yersinia infection                              | TBK1   |
| Yersinia infection                              | AKT1   |
| Yersinia infection                              | CASP1  |
| Yersinia infection                              | ZAP70  |
| Yersinia infection                              | MAPK8  |
| Non-small cell lung cancer                      | STAT3  |
| Non-small cell lung cancer                      | PIK3CB |
| Non-small cell lung cancer                      | MET    |
| Non-small cell lung cancer                      | RAF1   |
| Non-small cell lung cancer                      | PIK3CD |
| Non-small cell lung cancer                      | PIK3CA |
| Non-small cell lung cancer                      | MAPK1  |
| Non-small cell lung cancer                      | AKT1   |
| Non-small cell lung cancer                      | ERBB2  |
| Non-small cell lung cancer                      | EGFR   |
| Non-small cell lung cancer                      | CDK4   |
| Influenza A                                     | IL6    |
| Influenza A                                     | IFNG   |
| Influenza A                                     | CCL2   |

|                                   |         |  |
|-----------------------------------|---------|--|
| Influenza A                       | SLC25A4 |  |
| Influenza A                       | NLRP3   |  |
| Influenza A                       | PIK3CB  |  |
| Influenza A                       | RAF1    |  |
| Influenza A                       | JAK2    |  |
| Influenza A                       | PIK3CD  |  |
| Influenza A                       | PIK3CA  |  |
| Influenza A                       | MAPK1   |  |
| Influenza A                       | TBK1    |  |
| Influenza A                       | AKT1    |  |
| Influenza A                       | CASP1   |  |
| Influenza A                       | CDK4    |  |
| Prostate cancer                   | PIK3CB  |  |
| Prostate cancer                   | RAF1    |  |
| Prostate cancer                   | PIK3CD  |  |
| Prostate cancer                   | PIK3CA  |  |
| Prostate cancer                   | PLAT    |  |
| Prostate cancer                   | MAPK1   |  |
| Prostate cancer                   | AKT1    |  |
| Prostate cancer                   | FGFR1   |  |
| Prostate cancer                   | CDK2    |  |
| Prostate cancer                   | ERBB2   |  |
| Prostate cancer                   | EGFR    |  |
| Prostate cancer                   | MTOR    |  |
| Cellular senescence               | IL6     |  |
| Cellular senescence               | SLC25A4 |  |
| Cellular senescence               | MAPK14  |  |
| Cellular senescence               | PIK3CB  |  |
| Cellular senescence               | CHEK1   |  |
| Cellular senescence               | RAF1    |  |
| Cellular senescence               | PIK3CD  |  |
| Cellular senescence               | PIK3CA  |  |
| Cellular senescence               | MAPK1   |  |
| Cellular senescence               | AKT1    |  |
| Cellular senescence               | CDK2    |  |
| Cellular senescence               | MTOR    |  |
| Cellular senescence               | CDK1    |  |
| Cellular senescence               | CDK4    |  |
| T cell receptor signaling pathway | IFNG    |  |
| T cell receptor signaling pathway | IL10    |  |
| T cell receptor signaling pathway | MAPK14  |  |
| T cell receptor signaling pathway | PIK3CB  |  |
| T cell receptor signaling pathway | RAF1    |  |
| T cell receptor signaling pathway | PIK3CD  |  |

|                                   |        |
|-----------------------------------|--------|
| T cell receptor signaling pathway | PIK3CA |
| T cell receptor signaling pathway | MAPK1  |
| T cell receptor signaling pathway | AKT1   |
| T cell receptor signaling pathway | CDK4   |
| T cell receptor signaling pathway | ZAP70  |
| T cell receptor signaling pathway | MAPK8  |
| Ras signaling pathway             | KDR    |
| Ras signaling pathway             | PIK3CB |
| Ras signaling pathway             | MET    |
| Ras signaling pathway             | RAF1   |
| Ras signaling pathway             | PIK3CD |
| Ras signaling pathway             | PIK3CA |
| Ras signaling pathway             | MAPK1  |
| Ras signaling pathway             | TBK1   |
| Ras signaling pathway             | AKT1   |
| Ras signaling pathway             | FLT1   |
| Ras signaling pathway             | FGFR1  |
| Ras signaling pathway             | FLT3   |
| Ras signaling pathway             | EGFR   |
| Ras signaling pathway             | ZAP70  |
| Ras signaling pathway             | KIT    |
| Ras signaling pathway             | MAPK8  |
| Linezolid CYP3A4                  |        |
| Linezolid CYP2D6                  |        |
| Linezolid CYP2C9                  |        |
| Linezolid F5                      |        |
| Linezolid POLG                    |        |
| Linezolid TYMP                    |        |
| Linezolid ALB                     |        |
| Linezolid IL6                     |        |
| Linezolid COX2                    |        |
| Linezolid PIK3C2A                 |        |
| Linezolid CYP2C19                 |        |
| Linezolid IFNG                    |        |
| Linezolid CCL2                    |        |
| Linezolid IL10                    |        |
| Linezolid RRM2B                   |        |
| Linezolid SLC25A4                 |        |
| Linezolid DGUOK                   |        |
| Linezolid FANCI                   |        |
| Linezolid MPV17                   |        |
| Linezolid TWNK                    |        |
| Linezolid TRNM                    |        |
| Linezolid PPBP                    |        |

Linezolid NLRP3  
Linezolid TRNL1  
Linezolid TRNK  
Linezolid TRNF  
Linezolid CAT  
Linezolid HSPD1  
Linezolid EPO  
Linezolid COX1  
Linezolid ND6  
Linezolid COX3  
Linezolid CYTB  
Linezolid TRNS2  
Linezolid F10  
Linezolid STAT3  
Linezolid GBA  
Linezolid MAPK14  
Linezolid PRKDC  
Linezolid RORC  
Linezolid KDR  
Linezolid PIK3CB  
Linezolid CHEK1  
Linezolid P2RX7  
Linezolid SYK  
Linezolid MET  
Linezolid LRRK2  
Linezolid RAF1  
Linezolid JAK2  
Linezolid PARP1  
Linezolid ASAH1  
Linezolid CNR2  
Linezolid PIK3CD  
Linezolid PIK3CG  
Linezolid PIK3CA  
Linezolid ALOX5  
Linezolid PLAT  
Linezolid KLKB1  
Linezolid MAPK1  
Linezolid CD38  
Linezolid TBK1  
Linezolid CASP7  
Linezolid AKT1  
Linezolid CASP1  
Linezolid PABPC1  
Linezolid FLT1



Linezolid FGFR1  
Linezolid FLT3  
Linezolid ACHE  
Linezolid ELANE  
Linezolid CDK2  
Linezolid IDO1  
Linezolid ERBB2  
Linezolid EGFR  
Linezolid MTOR  
Linezolid AURKB  
Linezolid CDK1  
Linezolid CDK4  
Linezolid NAAA  
Linezolid AURKA  
Linezolid ZAP70  
Linezolid SELE  
Linezolid KIT  
Linezolid MAPK8  
Linezolid RAD51  
Thrombocytopenia CYP3A4  
Thrombocytopenia CYP2D6  
Thrombocytopenia CYP2C9  
Thrombocytopenia F5  
Thrombocytopenia POLG  
Thrombocytopenia TYMP  
Thrombocytopenia ALB  
Thrombocytopenia IL6  
Thrombocytopenia COX2  
Thrombocytopenia PIK3C2A  
Thrombocytopenia CYP2C19  
Thrombocytopenia IFNG  
Thrombocytopenia CCL2  
Thrombocytopenia IL10  
Thrombocytopenia RRM2B  
Thrombocytopenia SLC25A4  
Thrombocytopenia DGUOK  
Thrombocytopenia FANCI  
Thrombocytopenia MPV17  
Thrombocytopenia TWNK  
Thrombocytopenia TRNM  
Thrombocytopenia PPBP  
Thrombocytopenia NLRP3  
Thrombocytopenia TRNL1  
Thrombocytopenia TRNK

Thrombocytopenia TRNF  
Thrombocytopenia CAT  
Thrombocytopenia HSPD1  
Thrombocytopenia EPO  
Thrombocytopenia COX1  
Thrombocytopenia ND6  
Thrombocytopenia COX3  
Thrombocytopenia CYTB  
Thrombocytopenia TRNS2  
Thrombocytopenia F10  
Thrombocytopenia STAT3  
Thrombocytopenia GBA  
Thrombocytopenia MAPK14  
Thrombocytopenia PRKDC  
Thrombocytopenia RORC  
Thrombocytopenia KDR  
Thrombocytopenia PIK3CB  
Thrombocytopenia CHEK1  
Thrombocytopenia P2RX7  
Thrombocytopenia SYK  
Thrombocytopenia MET  
Thrombocytopenia LRRK2  
Thrombocytopenia RAF1  
Thrombocytopenia JAK2  
Thrombocytopenia PARP1  
Thrombocytopenia ASAH1  
Thrombocytopenia CNR2  
Thrombocytopenia PIK3CD  
Thrombocytopenia PIK3CG  
Thrombocytopenia PIK3CA  
Thrombocytopenia ALOX5  
Thrombocytopenia PLAT  
Thrombocytopenia KLKB1  
Thrombocytopenia MAPK1  
Thrombocytopenia CD38  
Thrombocytopenia TBK1  
Thrombocytopenia CASP7  
Thrombocytopenia AKT1  
Thrombocytopenia CASP1  
Thrombocytopenia PABPC1  
Thrombocytopenia FLT1  
Thrombocytopenia FGFR1  
Thrombocytopenia FLT3  
Thrombocytopenia ACHE

Thrombocytopenia ELANE  
Thrombocytopenia CDK2  
Thrombocytopenia IDO1  
Thrombocytopenia ERBB2  
Thrombocytopenia EGFR  
Thrombocytopenia MTOR  
Thrombocytopenia AURKB  
Thrombocytopenia CDK1  
Thrombocytopenia CDK4  
Thrombocytopenia NAAA  
Thrombocytopenia AURKA  
Thrombocytopenia ZAP70  
Thrombocytopenia SELE  
Thrombocytopenia KIT  
Thrombocytopenia MAPK8  
Thrombocytopenia RAD51
