# Supplementary material for: Identifying and Targeting Prediction of the PI3K-AKT Signaling Pathway in Drug-Induced Thrombocytopenia in Infected Patients Receiving Linezolid Therapy: A Network Pharmacology-Based Analysis
Source: J Healthc Eng. 2022 Oct 15;2022:2282351. doi: 10.1155/2022/2282351 (PMC9588367; doi:10.1155/2022/2282351)
Supplement: Supplementary Materials — Supplementary Table 1 and experimental dataset are provided for MCODE cluster analysis. Supplementary data files for all the figures are also provided in the supplementary materials. [file 2282351.f1.zip]

Archive with 8 entries (8 files):
- 1. Supplementary Table 1.docx
- Figure 4-topological data.pdf
- Figure 5-network data.pdf
- Figure 6-Go enrichment data.pdf
- Figure 7-KEGG data.pdf
- Figure 8-Drug-target-pathway network data.pdf
- Figures 1-3 disease data.pdf
- Figures 1-3 drug data.pdf
